# Supplementary material for: Water-mediated radical C–H tosylation of alkenes with tosyl cyanide
Source: Royal Society of Chemistry journal article supplement (doi:10.1039/d2cc06101e), 2022-12-08
Supplement: d2cc06101e1.pdf [file d2cc06101e1.pdf]

## Supplementary Information

# Water-Mediated Radical C–H Tosylation of Alkenes with Tosyl Cyanides

Dongyan Hu, Yang Zhang, Jianwei Li, Kangjiang Liang,\* and Chengfeng Xia\*

Key Laboratory of Medicinal Chemistry for Natural Resource, Ministry of Education;  
Yunnan Research & Development Center for Natural Products; School of Pharmacy,  
Yunnan University, Kunming 650500, China.

E-mail: [xiacf@ynu.edu.cn](mailto:xiacf@ynu.edu.cn); [liangkangjiang@ynu.edu.cn](mailto:liangkangjiang@ynu.edu.cn)

### Table of Contents

|                                                                            |     |
|----------------------------------------------------------------------------|-----|
| 1. General information.....                                                | S2  |
| 2. General procedure for the tosylation of alkenes with tosyl cyanide..... | S3  |
| 3. Reaction setup for the gram-scale experiment.....                       | S4  |
| 4. Controlled experiments for water-mediated tosylation.....               | S5  |
| 5. Experiments for radical pathway investigation.....                      | S7  |
| 6. Parallel KIE experiments.....                                           | S10 |
| 7. EPR experiments.....                                                    | S11 |
| 8. Identification of compounds.....                                        | S12 |
| 9. Transformations of alkenyl sulfone.....                                 | S32 |
| 10. Copies of NMR spectra.....                                             | S34 |
| 11. References.....                                                        | S87 |

## 1. General information

All reactions were performed under argon using flame-dried glassware unless otherwise noted. DMF was distilled over  $\text{CaH}_2$  and rigorously degassed by freeze/pump/thaw. All reagents and starting materials were commercially available and used without further purification unless indicated otherwise. Thin layer chromatographies were carried out on GF254 plates (0.25 mm layer thickness). Flash chromatographies were performed with 200–300 mesh silica gels. Reactions were monitored by TLC and visualized by  $\text{KMnO}_4$  stain. Yields reported were for isolated, spectroscopically pure compounds.

$^1\text{H}$  NMR,  $^{13}\text{C}$  NMR, and  $^{19}\text{F}$  NMR spectra were recorded on Bruker Avance 400, 500, and 600 MHz spectrophotometers. Chemical shifts ( $\delta$ ) were expressed in ppm and  $J$ -values are given in Hz. Chemical shifts in  $^1\text{H}$  NMR spectra were reported in parts per million (ppm) on the  $\delta$  scale from an internal standard of residual chloroform (7.26 ppm). Data for  $^{13}\text{C}$  NMR spectra were presented in terms of chemical shift in ppm from the central peak of  $\text{CDCl}_3$  (77.16 ppm).  $^1\text{H}$  NMR data were presented as follows: multiplicity (s = singlet, d = doublet, t = triplet, q = quartet, dd = doublet of doublet, dt = doublet of triplet, m = multiplet, br s = broad singlet), coupling constant in Hertz (Hz) and integration. HR-ESI-MS were taken on Agilent 6540 Q-TOF spectrometer. EPR spectra were recorded by an ADANI SPINSCAN X spectrometer. Melting points were measured on a Hanon MP 430 auto melting-point system and values are uncorrected.

## 2. General procedure for the tosylation of alkenes with tosyl cyanide

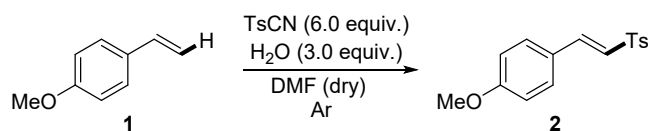

To an oven dried 10 mL glass tube with a magnetic stirring bar was added TsCN (1.8 mmol, 6.0 equiv.) under argon. Then DMF (3.0 mL), alkenes (0.3 mmol, 1.0 equiv.), and H<sub>2</sub>O (0.9 mmol, 3.0 equiv.) were added. After stirring at room temperature for 48 h, the reaction mixture was diluted with ethyl acetate. The mixture was washed with water (15 mL  $\times$  3), followed by NaHCO<sub>3</sub> aq. and brine. After dried over anhydrous Na<sub>2</sub>SO<sub>4</sub> and concentrated, the crude product was subjected to column chromatography (acetone/petroleum ether = 1:10) on silica gel to afford **2**.<sup>1</sup> The spectral properties were consistent with the reported values. <sup>1</sup>H NMR (CDCl<sub>3</sub>, 600 MHz)  $\delta$  7.81 (d,  $J$  = 7.9 Hz, 2H), 7.60 (d,  $J$  = 15.3 Hz, 1H), 7.42 (d,  $J$  = 8.3 Hz, 2H), 7.33 (d,  $J$  = 7.9 Hz, 2H), 6.89 (d,  $J$  = 8.3 Hz, 2H), 6.69 (d,  $J$  = 15.3 Hz, 1H), 3.83 (s, 3H), 2.42 (s, 3H). <sup>13</sup>C{<sup>1</sup>H} NMR (CDCl<sub>3</sub>, 150 MHz)  $\delta$  162.0, 144.1, 141.7, 138.2, 130.3, 129.9, 127.6, 125.1, 124.9, 114.5, 55.4, 21.6.

### 3. Reaction setup for the gram-scale experiment

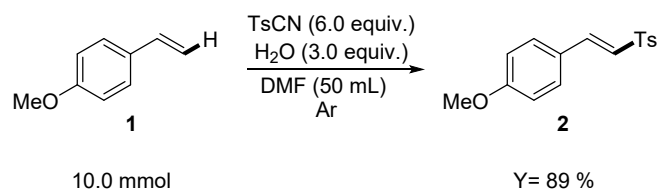

To an oven dried 100mL round-bottom flask with a magnetic stirring bar was added TsCN (10.9 g, 60 mmol) under argon. Then DMF (50 mL), *p*-methoxystyrene **1** (1.34 g, 10 mmol), and H<sub>2</sub>O (540 μL, 30 mmol) were added. After stirred at room temperature for 56 h, the reaction mixture was diluted with ethyl acetate. The mixture was washed with water (45 mL × 3), followed by NaHCO<sub>3</sub> aq. and brine. After dried over anhydrous Na<sub>2</sub>SO<sub>4</sub> and concentrated, the crude product was subjected to column chromatography (acetone/petroleum ether = 1:10) on silica gel to afford **2** (2.5 g, 89% yield).

#### 4. Controlled experiments for water-mediated tosylation

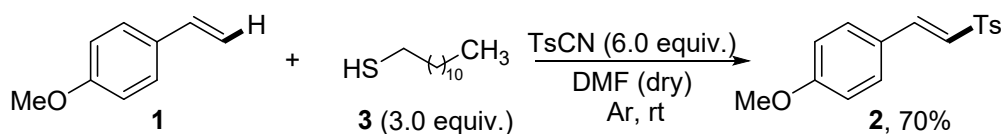

To an oven dried 10 mL glass tube with a magnetic stirring bar was added TsCN (326.2 mg, 1.8 mmol) under argon. Then DMF (3.0 mL), *p*-methoxystyrene **1** (40  $\mu$ L, 0.3 mmol), and dodecanethiol **3** (216  $\mu$ L, 0.9 mmol) were added. After stirred at room temperature for 48 h, the reaction mixture was diluted with ethyl acetate. The mixture was washed with water (15 mL  $\times$  3), followed by NaHCO<sub>3</sub> aq. and brine. After dried over anhydrous Na<sub>2</sub>SO<sub>4</sub> and concentrated, the crude product was subjected to column chromatography (acetone/petroleum ether = 1:10) on silica gel to afford **2** (60.7 mg, 70% yield).

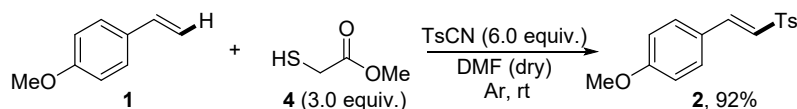

To an oven dried 10 mL glass tube with a magnetic stirring bar was added TsCN (326.2 mg, 1.8 mmol) under argon. Then DMF (3.0 mL), *p*-methoxystyrene **1** (40  $\mu$ L, 0.30 mmol), and methyl thioglycolate **4** (80  $\mu$ L, 0.9 mmol) were added. After stirred at room temperature for 48 h, the reaction mixture was diluted with ethyl acetate. The mixture was washed with water (15 mL  $\times$  3), followed by NaHCO<sub>3</sub> aq. and brine. After dried over anhydrous Na<sub>2</sub>SO<sub>4</sub> and concentrated, the crude product was subjected to column chromatography (acetone/petroleum ether = 1:10) on silica gel to afford **2** (79.2 mg, 92% yield).

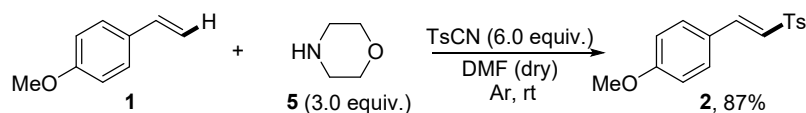

To an oven dried 10 mL glass tube with a magnetic stirring bar was added TsCN (326.2 mg, 1.8 mmol) under argon. Then DMF (3.0 mL), *p*-methoxystyrene **1** (40  $\mu$ L, 0.3 mmol), and morpholine **5** (79  $\mu$ L, 0.9 mmol) were added. After stirred at room

temperature for 48 h, the reaction mixture was diluted with ethyl acetate. The mixture was washed with water (15 mL  $\times$  3), followed by NaHCO<sub>3</sub> aq. and brine. After dried over anhydrous Na<sub>2</sub>SO<sub>4</sub> and concentrated, the crude product was subjected to column chromatography (acetone/petroleum ether = 1:10) on silica gel to afford **2** (75.1 mg, 87% yield).

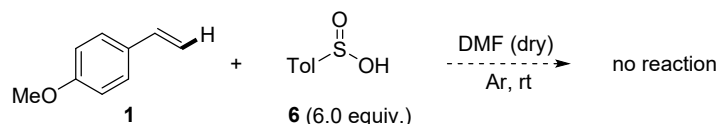

To an oven dried 10 mL glass tube with a magnetic stirring bar was added *p*-toluenesulfonic acid **6**. (281.2 mg, 1.8 mmol) under argon. Then DMF (3.0 mL) and *p*-methoxystyrene **1** (40  $\mu$ L, 0.3 mmol) were added. The reaction mixture was stirred at room temperature for 48 h and monitored by TLC. The TLC showed that there was no target product generated.

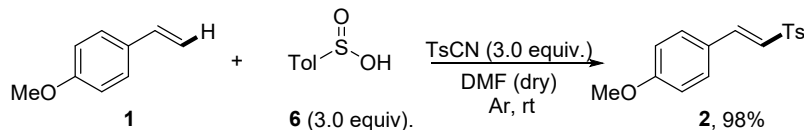

To an oven dried 10 mL glass tube with a magnetic stirring bar was added TsCN (163.1 mg, 0.9 mmol) under argon. Then DMF (3.0 mL), *p*-methoxystyrene **1** (40  $\mu$ L, 0.3 mmol), and *p*-toluenesulfonic acid **6** (140.1 mg, 0.9 mmol) were added. After stirred at room temperature for 48 h, the reaction mixture was diluted with ethyl acetate. The mixture was washed with water (15 mL  $\times$  3), followed by NaHCO<sub>3</sub> aq. and brine. After dried over anhydrous Na<sub>2</sub>SO<sub>4</sub> and concentrated, the crude product was subjected to column chromatography (acetone/petroleum ether = 1:10) on silica gel to afford **2** (84.7 mg, 98% yield).

## 5. Experiments for radical pathway investigation

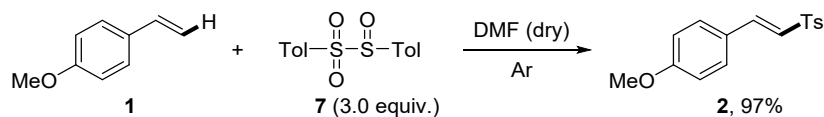

To an oven dried 10 mL glass tube with a magnetic stirring bar was added sulfanyl sulfone **7** (264.6 mg, 0.9 mmol) under argon. Then DMF (3.0 mL) and *p*-methoxystyrene **1** (40  $\mu$ L, 0.3 mmol) were added. After stirred at room temperature for 24 h, the reaction mixture was diluted with ethyl acetate. The mixture was washed with water (15 mL  $\times$  3), followed by NaHCO<sub>3</sub> aq. and brine. After dried over anhydrous Na<sub>2</sub>SO<sub>4</sub> and concentrated, the crude product was subjected to column chromatography (acetone/petroleum ether = 1:10) on silica gel to afford **2** (83.6 mg, 97% yield). Sulfanyl sulfone **7** was prepared according to the known procedures.<sup>2</sup> <sup>1</sup>H NMR (CDCl<sub>3</sub>, 400 MHz)  $\delta$  7.51 (d,  $J$  = 8.0 Hz, 2H), 7.48 (d,  $J$  = 7.9 Hz, 2H), 7.33–7.28 (m, 4H), 2.45 (s, 3H), 2.44 (s, 3H). <sup>13</sup>C {<sup>1</sup>H} NMR (CDCl<sub>3</sub>, 100 MHz)  $\delta$  146.9, 144.6, 134.8, 130.3, 129.9, 129.8, 129.7, 125.8, 21.9, 21.8.

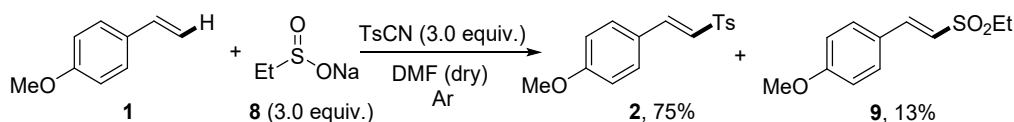

To an oven dried 10 mL glass tube with a magnetic stirring bar was added TsCN (163.1 mg, 0.9 mmol) under argon. Then DMF (3.0 mL), *p*-methoxystyrene **1** (40  $\mu$ L, 0.3 mmol), and sodium ethylsulfinate **8** (104.5 mg, 0.9 mmol) were added. After stirred at room temperature for 48 h, the reaction mixture was diluted with ethyl acetate. The mixture was washed with water (15 mL  $\times$  3), followed by NaHCO<sub>3</sub> aq. and brine. After dried over anhydrous Na<sub>2</sub>SO<sub>4</sub> and concentrated, the crude product was subjected to column chromatography (acetone/petroleum ether = 1:20) on silica gel to afford **2** (65.1mg, 75% yield) and **9** as a white powder (8.9 mg, 13% yield). The spectral properties of **9** were consistent with the reported values.<sup>3</sup> <sup>1</sup>H NMR (CDCl<sub>3</sub>, 400 MHz)  $\delta$  7.54 (d,  $J$  = 15.4 Hz, 1H), 7.47 (d,  $J$  = 8.8 Hz, 2H), 6.93 (d,  $J$  = 8.8 Hz, 2H), 6.65 (d,  $J$  = 15.4 Hz, 1H), 3.85 (s, 3H), 3.08 (q,  $J$  = 7.4 Hz, 2H), 1.38 (t,  $J$  = 7.5 Hz, 3H). <sup>13</sup>C

{<sup>1</sup>H} NMR (CDCl<sub>3</sub>, 100 MHz) δ 162.2, 144.9, 130.4, 124.9, 121.1, 114.6, 55.5, 49.6, 7.4.

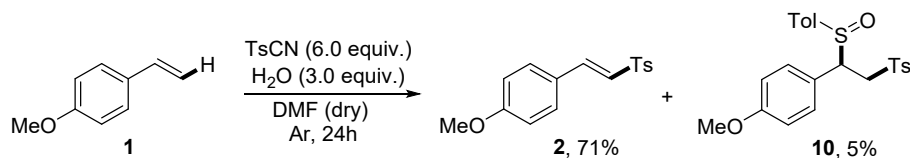

To an oven dried 10 mL glass tube with a magnetic stirring bar was added TsCN (326.2 mg, 1.8 mmol) under argon. Then DMF (3.0 mL), *p*-methoxystyrene **1** (40 μL, 0.3 mmol), and H<sub>2</sub>O (16 μL 0.9 mmol) were added. After stirred at room temperature for 24 h, the reaction mixture was diluted with ethyl acetate. The mixture was washed with water (15 mL × 3), followed by NaHCO<sub>3</sub> aq. and brine. After dried over anhydrous Na<sub>2</sub>SO<sub>4</sub> and concentrated, the crude product was subjected to column chromatography (acetone/petroleum ether = 1:15) on silica gel to afford **2** (61.3 mg, 71% yield) and **10** as a white powder (6.4 mg, 5% yield). <sup>1</sup>H NMR (CDCl<sub>3</sub>, 400 MHz) δ 7.45 (d, *J* = 8.3 Hz, 2H), 7.20 (d, *J* = 8.1 Hz, 2H), 7.17–7.10 (m, 4H), 6.81 (d, *J* = 8.7 Hz, 2H), 6.66 (d, *J* = 8.7 Hz, 2H), 4.09 (dd, *J* = 11.8, 3.0 Hz, 1H), 3.89 (dd, *J* = 14.3, 3.0 Hz, 1H), 3.81 (dd, *J* = 14.0, 2.3 Hz, 1H), 3.76 (s, 3H), 2.39 (s, 3H), 2.37 (s, 3H). <sup>13</sup>C {<sup>1</sup>H} NMR (CDCl<sub>3</sub>, 100 MHz) δ 160.0, 144.5, 142.2, 137.8, 136.6, 130.4, 129.7, 129.6, 127.9, 124.9, 123.1, 114.0, 66.0, 55.3, 55.0, 21.6, 21.5. HR-ESI-MS (*m/z*): calcd. for C<sub>23</sub>H<sub>25</sub>O<sub>4</sub>S<sub>2</sub> [M + H]<sup>+</sup>, 429.1189, found 429.1185.

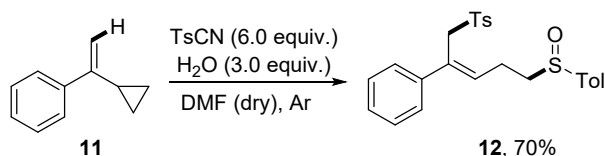

Compound **11** was prepared according to the known procedures.<sup>4</sup> <sup>1</sup>H NMR (CDCl<sub>3</sub>, 400 MHz) δ 7.62–7.57 (m, 2H), 7.36–7.30 (m, 2H), 7.29–7.23 (m, 1H), 5.27 (d, *J* = 1.1 Hz, 1H), 4.92 (d, *J* = 1.1 Hz, 1H), 1.71–1.58 (m, 1H), 0.86–0.76 (m, 2H), 0.61–0.53 (m, 2H).

To an oven dried 10 mL glass tube with a magnetic stirring bar was added TsCN (326.2 mg, 1.8mmol) under argon. Then DMF (3.0 mL), α-cyclopropylstyrene **11** (43.3



mg, 0.3 mmol), and H<sub>2</sub>O (16 μL 0.9 mmol) were added. After stirred at room temperature for 24 h, the reaction mixture was diluted with ethyl acetate. The mixture was washed with water (15 mL × 3), followed by NaHCO<sub>3</sub> aq. and brine. After dried over anhydrous Na<sub>2</sub>SO<sub>4</sub> and concentrated, the crude product was subjected to column chromatography (acetone/petroleum ether = 1:30) on silica gel to afford **12** as a colorless oil (92.3 mg, 70% yield). <sup>1</sup>H NMR (CDCl<sub>3</sub>, 500 MHz) δ 7.59 (d, *J* = 8.3 Hz, 2H), 7.50 (d, *J* = 8.2 Hz, 2H), 7.33 (d, *J* = 7.9 Hz, 2H), 7.20–7.14 (m, 7H), 5.96 (t, *J* = 7.7 Hz, 1H), 4.36–4.22 (m, 2H), 2.95–2.82 (m, 2H), 2.68–2.59 (m, 1H), 2.46–2.41 (m, 1H), 2.41 (s, 3H), 2.36 (s, 3H). <sup>13</sup>C {<sup>1</sup>H} NMR (CDCl<sub>3</sub>, 125 MHz) δ 144.6, 141.5, 140.5, 140.3, 136.2, 134.1, 130.4, 130.0, 129.6, 128.35, 128.32, 127.4, 126.5, 124.1, 57.7, 55.6, 22.4, 21.6, 21.4. HR-ESI-MS (*m/z*): calcd. for C<sub>25</sub>H<sub>27</sub>O<sub>3</sub>S<sub>2</sub> [M + H]<sup>+</sup>, 439.1396, found 439.1391.

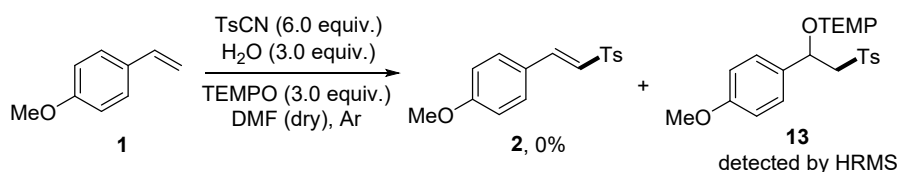

To an oven dried 10 mL glass tube with a magnetic stirring bar was added TsCN (326.2 mg, 1.8mmol) under argon. Then DMF (3.0 mL), *p*-methoxystyrene **1** (40 μL, 0.3 mmol), TEMPO (140.4 mg, 0.9 mmol), and H<sub>2</sub>O (16 μL 0.9 mmol) were added. The reaction mixture was stirred at room temperature for 48 h. Compound **13** was detected by HRMS. HR-ESI-MS (*m/z*): calcd. for C<sub>25</sub>H<sub>36</sub>NO<sub>4</sub>S [M + H]<sup>+</sup>, 4446.2360, found 446.2356.

## 6. Parallel KIE experiments

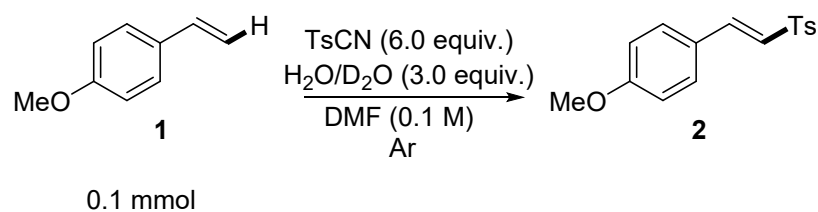

To an oven dried 10 mL glass tube with a magnetic stirring bar was added TsCN (108.6 mg, 0.6 mmol) under argon. Then DMF (1.0 mL), *p*-methoxystyrene **1** (13  $\mu$ L, 0.1 mmol), and H<sub>2</sub>O (5.4  $\mu$ L, 0.3 mmol) or D<sub>2</sub>O (5.7  $\mu$ L, 0.3 mmol) were added. The mixture was stirring at room temperature for corresponding time, and the product yield was analyzed by NMR with diphenylacetonitrile as internal standard.

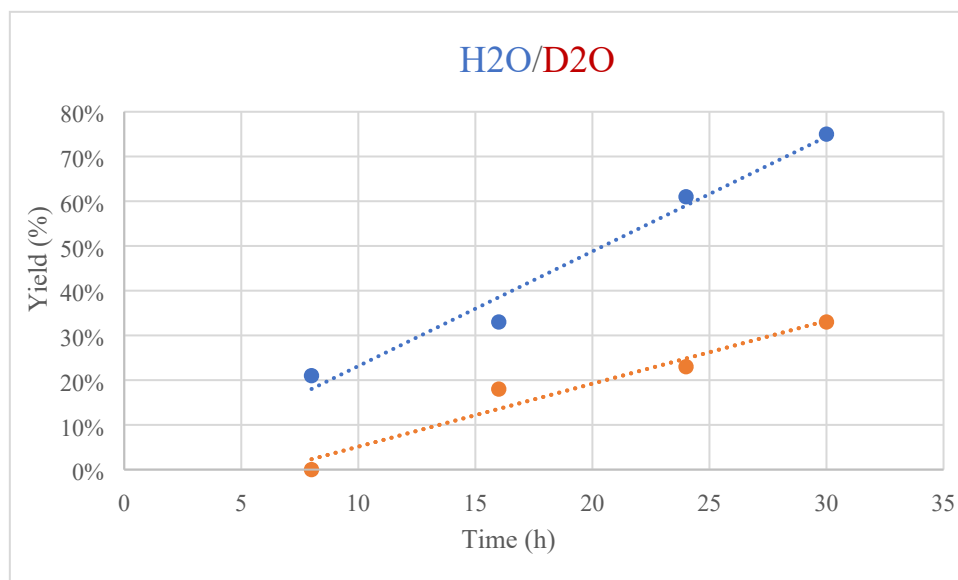

$$\text{KIE} = K_{\text{H}}/K_{\text{D}} = 1.82$$

## 7. EPR experiments

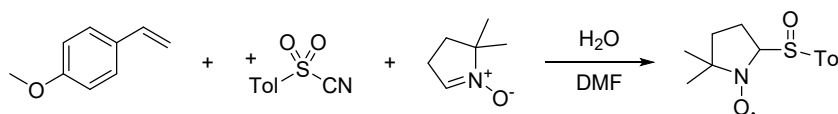

EPR spectra were recorded at room temperature on an ANANI SPINSCAN X spectrometer.

EPR spectrometer was operated at 9.446724 GHz. Typical spectrometer parameters are shown as following: scan range: 50 100  $\mu$ T; modulation frequency: 93750 Hz; power attenuation: 25 dB; g-factor: 1.9999

A mixture of *p*-methoxystyrene **1** (13  $\mu$ L, 0.1 mmol) and TsCN (108.7 mg, 0.6 mmol) in degassed dry DMF (1.0 mL) was added H<sub>2</sub>O (5.4  $\mu$ L, 0.3 mmol). After stirred under an argon atmosphere for 5h, DMPO (67.9 mg, 0.6 mmol) was added into the reaction. Afterwards, 20  $\mu$ L of the mixture was quickly taken out into a small tube and analyzed by EPR.<sup>5</sup>  $A_N = 13.5$  G,  $A_{HB} = 12.5$  G.

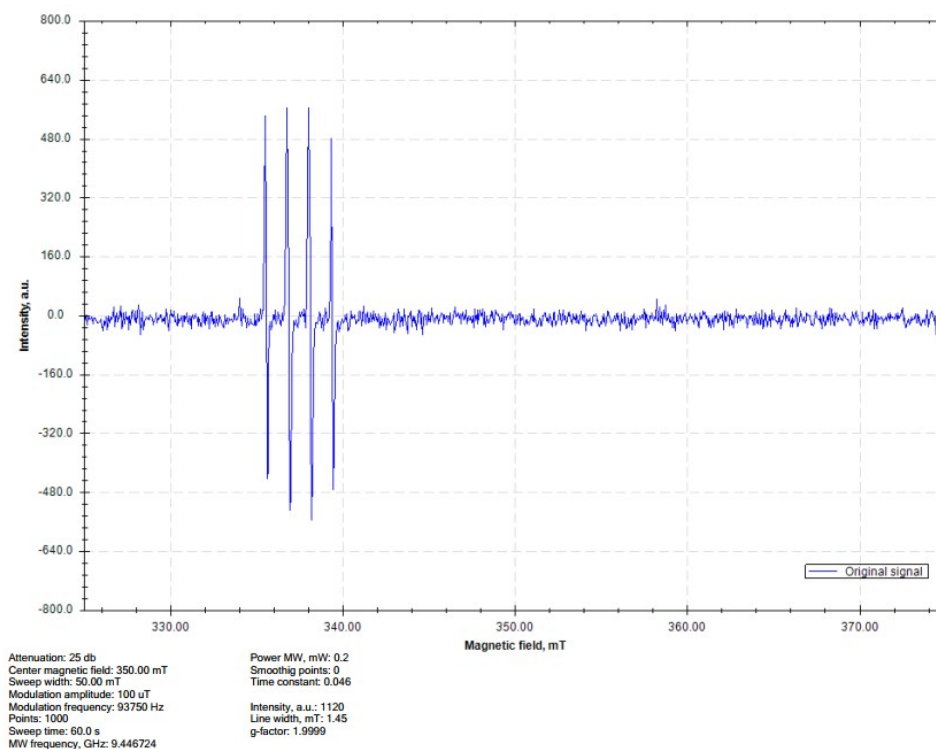

## 8. Identification of compounds

### (*E*)-1-Methyl-4-(styrylsulfonyl)benzene (**14**)<sup>6</sup>

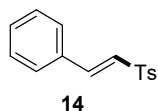

Prepared according to the general procedure using styrene (34  $\mu$ L, 0.3 mmol), TsCN (326.2 mg, 1.8 mmol), H<sub>2</sub>O (16  $\mu$ L, 0.9 mmol), and DMF (3.0 mL). The mixture was stirred at room temperature for 48 h and purified by column chromatography (acetone/petroleum ether = 1:15) on silica gel to afford product **14** as a colorless solid (69.8 mg, 90% yield). <sup>1</sup>H NMR (CDCl<sub>3</sub>, 400 MHz)  $\delta$  7.83 (d,  $J$  = 8.4 Hz, 2H), 7.66 (d,  $J$  = 15.4 Hz, 1H), 7.48 (dd,  $J$  = 7.5, 2.1 Hz, 2H), 7.43–7.32 (m, 5H), 6.85 (d,  $J$  = 15.4 Hz, 1H), 2.44 (s, 3H). <sup>13</sup>C{<sup>1</sup>H} NMR (CDCl<sub>3</sub>, 100 MHz)  $\delta$  144.4, 142.0, 137.7, 132.5, 131.1, 130.0, 129.1, 128.5, 127.7, 127.6, 21.6.

### (*E*)-1-Fluoro-4-(2-tosylvinyl)benzene (**15**)<sup>7</sup>

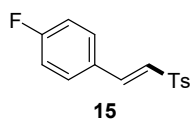

Prepared according to the general procedure using 1-fluoro-4-vinylbenzene (36  $\mu$ L, 0.3 mmol), TsCN (326.2 mg, 1.8 mmol), H<sub>2</sub>O (16  $\mu$ L, 0.9 mmol), and DMF (3.0 mL). The mixture was stirred at room temperature for 48 h and purified by column chromatography (acetone/petroleum ether = 1:15) on silica gel to afford product **15** as a colorless solid (70.1 mg, 85% yield). <sup>1</sup>H NMR (CDCl<sub>3</sub>, 600 MHz)  $\delta$  7.82 (d,  $J$  = 8.1 Hz, 2H), 7.62 (d,  $J$  = 15.3 Hz, 1H), 7.50–7.44 (m, 2H), 7.34 (d,  $J$  = 8.3 Hz, 2H), 7.07 (t,  $J$  = 8.6 Hz, 2H), 6.78 (d,  $J$  = 15.3 Hz, 1H), 2.43 (s, 3H). <sup>13</sup>C{<sup>1</sup>H} NMR (CDCl<sub>3</sub>, 150 MHz)  $\delta$  165.2 (d, <sup>1</sup> $J_{C-F}$  = 251.4 Hz), 144.5, 140.6, 137.7, 130.6 (d, <sup>3</sup> $J_{C-F}$  = 10.3 Hz), 130.0, 128.7, 127.7, 127.4, 116.4 (d, <sup>2</sup> $J_{C-F}$  = 22.0 Hz), 21.6. <sup>19</sup>F NMR (CDCl<sub>3</sub>, 565 MHz)  $\delta$  -107.91 (s, 1F).

### (*E*)-1-Chloro-4-(2-tosylvinyl)benzene (**16**)<sup>7</sup>

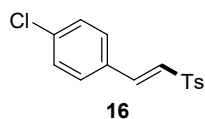

Prepared according to the general procedure using 1-chloro-4-vinylbenzene (36  $\mu$ L, 0.3 mmol), TsCN (326.2 mg, 1.8 mmol), H<sub>2</sub>O (16  $\mu$ L, 0.9 mmol), and DMF (3.0 mL). The mixture was stirred at room temperature for 48 h and purified by column chromatography (acetone/petroleum ether = 1:15) on silica gel to afford product **16** as a colorless solid (68.8 mg, 79% yield). <sup>1</sup>H NMR (CDCl<sub>3</sub>, 500 MHz)  $\delta$  7.82 (d,  $J$  = 8.3 Hz, 2H), 7.60 (d,  $J$  = 15.4 Hz, 1H), 7.40 (d,  $J$  = 8.6 Hz, 2H), 7.36–7.32 (m, 4H), 6.83 (d,  $J$  = 15.4 Hz, 1H), 2.43 (s, 3H). <sup>13</sup>C {<sup>1</sup>H} NMR (CDCl<sub>3</sub>, 125 MHz)  $\delta$  144.6, 140.4, 137.5, 137.1, 131.0, 130.1, 129.7, 129.4, 128.3, 127.8, 21.7.

**(E)-1-Bromo-4-(2-tosylvinyl)benzene (17)**<sup>7</sup>

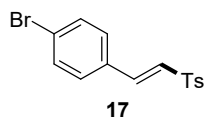

Prepared according to the general procedure using 1-bromo-4-vinylbenzene (39  $\mu$ L, 0.3 mmol), TsCN (326.2 mg, 1.8 mmol), H<sub>2</sub>O (16  $\mu$ L, 0.9 mmol), and DMF (3.0 mL). The mixture was stirred at room temperature for 48 h and purified by column chromatography (acetone/petroleum ether = 1:15) on silica gel to afford product **17** as a colorless solid (90.2 mg, 90% yield). <sup>1</sup>H NMR (CDCl<sub>3</sub>, 400 MHz)  $\delta$  7.82 (d,  $J$  = 8.3 Hz, 2H), 7.59 (d,  $J$  = 15.4 Hz, 1H), 7.52 (d,  $J$  = 8.4 Hz, 2H), 7.37–7.31 (m, 4H), 6.84 (d,  $J$  = 15.4 Hz, 1H), 2.44 (s, 3H). <sup>13</sup>C {<sup>1</sup>H} NMR (CDCl<sub>3</sub>, 100 MHz)  $\delta$  144.6, 140.5, 137.4, 132.4, 131.4, 130.1, 129.9, 128.3, 127.8, 125.5, 21.6.

**(E)-4-(2-Tosylvinyl)benzotrile (18)**<sup>1</sup>

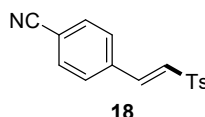

Prepared according to the general procedure using 4-vinylbenzotrile (36  $\mu$ L, 0.3 mmol), TsCN (326.2 mg, 1.8 mmol), H<sub>2</sub>O (16  $\mu$ L, 0.9 mmol), and DMF (3.0 mL). The mixture was stirred at room temperature for 48 h and purified by column chromatography (acetone/petroleum ether = 1:10) on silica gel to afford product **18** as

a colorless solid (69.3 mg, 82% yield).  $^1\text{H}$  NMR ( $\text{CDCl}_3$ , 600 MHz)  $\delta$  7.83 (d,  $J = 8.2$  Hz, 2H), 7.68 (d,  $J = 8.5$  Hz, 2H), 7.64 (d,  $J = 15.4$  Hz, 1H), 7.57 (d,  $J = 8.3$  Hz, 2H), 7.37 (d,  $J = 7.9$  Hz, 2H), 6.95 (d,  $J = 15.4$  Hz, 1H), 2.45 (s, 3H).  $^{13}\text{C}\{^1\text{H}\}$  NMR ( $\text{CDCl}_3$ , 150 MHz)  $\delta$  145.0, 139.2, 136.9, 136.8, 132.8, 131.4, 130.2, 128.9, 128.0, 118.0, 114.3, 21.7.

**(E)-1-(*tert*-Butyl)-4-(2-tosylvinyl)benzene (19)**<sup>8</sup>

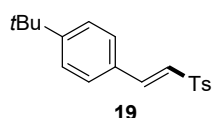

Prepared according to the general procedure using 1-(*tert*-butyl)-4-vinylbenzene (55  $\mu\text{L}$ , 0.3 mmol), TsCN (326.2 mg, 1.8 mmol),  $\text{H}_2\text{O}$  (16  $\mu\text{L}$ , 0.9 mmol), and DMF (3.0 mL). The mixture was stirred at room temperature for 48 h and purified by column chromatography (acetone/petroleum ether = 1:20) on silica gel to afford product **19** as a colorless solid (78.9 mg, 84% yield).  $^1\text{H}$  NMR ( $\text{CDCl}_3$ , 500 MHz)  $\delta$  7.82 (d,  $J = 8.3$  Hz, 2H), 7.65 (d,  $J = 15.4$  Hz, 1H), 7.44–7.38 (m, 4H), 7.32 (d,  $J = 8.1$  Hz, 2H), 6.82 (d,  $J = 15.4$  Hz, 1H), 2.42 (s, 3H), 1.30 (s, 9H).  $^{13}\text{C}\{^1\text{H}\}$  NMR ( $\text{CDCl}_3$ , 125 MHz,)  $\delta$  154.9, 144.3, 142.0, 138.0, 130.0, 129.7, 128.4, 127.7, 126.6, 126.1, 35.0, 31.1, 21.6.

**(E)-*N,N*-Dimethyl-4-(2-tosylvinyl)aniline (20)**<sup>9</sup>

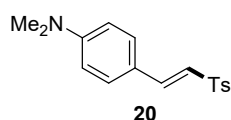

Prepared according to the general procedure using *N,N*-dimethyl-4-vinylaniline (42  $\mu\text{L}$ , 0.3 mmol), TsCN (326.2 mg, 1.8 mmol),  $\text{H}_2\text{O}$  (16  $\mu\text{L}$ , 0.9 mmol), and DMF (3.0 mL). The mixture was stirred at room temperature for 48 h and purified by column chromatography (acetone/petroleum ether = 1:5) on silica gel to afford product **20** as a colorless solid (85.0 mg, 71% yield).  $^1\text{H}$  NMR ( $\text{CDCl}_3$ , 500 MHz)  $\delta$  7.81 (d,  $J = 7.8$  Hz, 2H), 7.56 (d,  $J = 15.2$  Hz, 1H), 7.35 (d,  $J = 8.4$  Hz, 2H), 7.31 (d,  $J = 7.8$  Hz, 2H), 6.63 (d,  $J = 8.4$  Hz, 2H), 6.56 (d,  $J = 15.2$  Hz, 1H), 3.01 (s, 6H), 2.42 (s, 3H).  $^{13}\text{C}\{^1\text{H}\}$  NMR ( $\text{CDCl}_3$ , 125 MHz)  $\delta$  152.2, 143.7, 142.8, 139.0, 130.3, 129.8, 127.4, 121.2, 120.0, 111.7, 40.1 21.6.

**(E)-1-Methyl-2-(2-tosylvinyl)benzene (21)**<sup>10</sup>

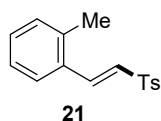

Prepared according to the general procedure using 1-methyl-2-vinylbenzene (40  $\mu$ L, 0.3 mmol), TsCN (326.2 mg, 1.8 mmol), H<sub>2</sub>O (16  $\mu$ L, 0.9 mmol), and DMF (3.0 mL). The mixture was stirred at room temperature for 48 h and purified by column chromatography (acetone/petroleum ether = 1:15) on silica gel to afford product **21** as a colorless solid (67.8 mg, 83% yield). <sup>1</sup>H NMR (CDCl<sub>3</sub>, 500 MHz)  $\delta$  7.94 (d,  $J$  = 15.3 Hz, 1H), 7.83 (d,  $J$  = 8.4 Hz, 2H), 7.42 (d,  $J$  = 7.8 Hz, 1H), 7.35 (d,  $J$  = 8.1 Hz, 2H), 7.32–7.25 (m, 1H), 7.23–7.15 (m, 2H), 6.77 (d,  $J$  = 15.3 Hz, 1H), 2.45 (s, 3H), 2.44 (s, 3H). <sup>13</sup>C{<sup>1</sup>H} NMR (CDCl<sub>3</sub>, 125 MHz)  $\delta$  144.4, 139.6, 138.2, 137.8, 131.4, 131.0, 130.9, 130.0, 128.6, 127.7, 126.9, 126.8, 21.6, 19.8.

**(E)-1-Nitro-2-(2-tosylvinyl)benzene (22)**<sup>11</sup>

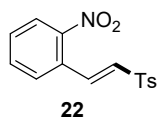

Prepared according to the general procedure using 1-nitro-2-vinylbenzene (42  $\mu$ L, 0.3 mmol), TsCN (326.2 mg, 1.8 mmol), H<sub>2</sub>O (16  $\mu$ L, 0.9 mmol), and DMF (3.0 mL). The mixture was stirred at room temperature for 48 h and purified by column chromatography (acetone/petroleum ether = 1:5) on silica gel to afford product **22** as a colorless solid (69.5 mg, 76% yield). <sup>1</sup>H NMR (CDCl<sub>3</sub>, 500 MHz)  $\delta$  8.32–(m, 1H), 8.24 (d,  $J$  = 8.4 Hz, 1H), 7.83 (d,  $J$  = 8.3 Hz, 2H), 7.79 (d,  $J$  = 7.8 Hz, 1H), 7.68 (d,  $J$  = 15.4 Hz, 1H), 7.60 (t,  $J$  = 8.0 Hz, 1H), 7.36 (d,  $J$  = 8.1 Hz, 2H), 7.01 (d,  $J$  = 15.4 Hz, 1H), 2.44 (s, 3H). <sup>13</sup>C{<sup>1</sup>H} NMR (CDCl<sub>3</sub>, 125 MHz)  $\delta$  148.7, 145.0, 138.8, 136.9, 134.3, 134.2, 131.1, 130.3, 130.2, 128.0, 125.3, 122.8, 21.7.

**(E)-1-Chloro-3-(2-tosylvinyl)benzene (23)**<sup>1</sup>

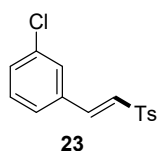

Prepared according to the general procedure using 1-chloro-3-vinylbenzene (38  $\mu\text{L}$ , 0.3 mmol), TsCN (326.2 mg, 1.8 mmol),  $\text{H}_2\text{O}$  (16  $\mu\text{L}$ , 0.9 mmol), and DMF (3.0 mL). The mixture was stirred at room temperature for 48 h and purified by column chromatography (acetone/petroleum ether = 1:15) on silica gel to afford product **23** as a colorless solid (69.7 mg, 80% yield).  $^1\text{H}$  NMR ( $\text{CDCl}_3$ , 500 MHz)  $\delta$  7.85 (d,  $J = 7.9$  Hz, 2H), 7.62 (d,  $J = 15.4$  Hz, 1H), 7.48 (s, 1H), 7.43–7.32 (m, 5H), 6.89 (d,  $J = 15.4$  Hz, 1H), 2.47 (s, 3H).  $^{13}\text{C}\{^1\text{H}\}$  NMR ( $\text{CDCl}_3$ , 125 MHz)  $\delta$  144.7, 140.2, 137.4, 135.1, 134.3, 131.0, 130.3, 130.1, 129.3, 128.2, 127.8, 126.8, 21.6.

**(E)-1-Methyl-3-(2-tosylvinyl)benzene (24)**<sup>10</sup>

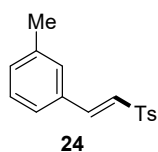

Prepared according to the general procedure using 1-methyl-3-vinylbenzene (39  $\mu\text{L}$ , 0.3 mmol), TsCN (326.2 mg, 1.8 mmol),  $\text{H}_2\text{O}$  (16  $\mu\text{L}$ , 0.9 mmol), and DMF (3.0 mL). The mixture was stirred at room temperature for 48 h and purified by column chromatography (acetone/petroleum ether = 1:15) on silica gel to afford product **24** as a colorless solid (68.2 mg, 84% yield).  $^1\text{H}$  NMR ( $\text{CDCl}_3$ , 400 MHz)  $\delta$  7.87 (d,  $J = 8.2$  Hz, 2H), 7.67 (d,  $J = 15.3$  Hz, 1H), 7.37 (d,  $J = 8.0$  Hz, 2H), 7.34–7.29 (m, 3H), 7.25 (s, 1H), 6.88 (d,  $J = 15.3$  Hz, 1H), 2.46 (s, 3H), 2.38 (s, 3H).  $^{13}\text{C}\{^1\text{H}\}$  NMR ( $\text{CDCl}_3$ , 100 MHz)  $\delta$  144.4, 142.1, 138.8, 137.8, 132.4, 132.0, 130.0, 129.1, 129.0, 127.7, 127.4, 125.8, 21.6, 21.3.

**(E)-1,4-Dimethyl-2-(2-tosylvinyl)benzene (25)**<sup>12</sup>

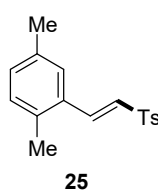



Prepared according to the general procedure using 1,4-dimethyl-2-vinylbenzene (44  $\mu\text{L}$ , 0.3 mmol), TsCN (326.2 mg, 1.8 mmol),  $\text{H}_2\text{O}$  (16  $\mu\text{L}$ , 0.9 mmol), and DMF (3.0 mL). The mixture was stirred at room temperature for 48 h and purified by column chromatography (acetone/petroleum ether = 1:20) on silica gel to afford product **25** as a colorless solid (66.3 mg, 77% yield).  $^1\text{H}$  NMR ( $\text{CDCl}_3$ , 400 MHz)  $\delta$  7.91 (d,  $J$  = 15.3 Hz, 1H), 7.83 (d,  $J$  = 8.3 Hz, 2H), 7.34 (d,  $J$  = 8.1 Hz, 2H), 7.24 (s, 1H), 7.10 (d,  $J$  = 1.1 Hz, 2H), 6.76 (d,  $J$  = 15.3 Hz, 1H), 2.44 (s, 3H), 2.40 (s, 3H), 2.28 (s, 3H).  $^{13}\text{C}\{^1\text{H}\}$  NMR ( $\text{CDCl}_3$ , 100 MHz)  $\delta$  144.3, 139.8, 137.9, 136.0, 135.2, 131.7, 131.1, 131.0, 130.0, 128.2, 127.7, 127.3, 21.6, 20.9, 19.3.

**(E)-1,3,5-Trimethyl-2-(2-tosylvinyl)benzene (26)**<sup>8</sup>

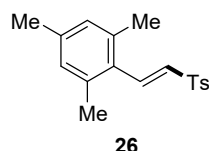

Prepared according to the general procedure using 1,3,5-trimethyl-2-vinylbenzene (48  $\mu\text{L}$ , 0.3 mmol), TsCN (326.2 mg, 1.8 mmol),  $\text{H}_2\text{O}$  (16  $\mu\text{L}$ , 0.9 mmol), and DMF (3.0 mL). The mixture was stirred at room temperature for 48 h and purified by column chromatography (acetone/petroleum ether = 1:25) on silica gel to afford product **26** as a colorless solid (85.0 mg, 79% yield).  $^1\text{H}$  NMR ( $\text{CDCl}_3$ , 500 MHz)  $\delta$  7.87–7.79 (m, 3H), 7.35 (d,  $J$  = 8.0 Hz, 2H), 6.87 (s, 2H), 6.52 (d,  $J$  = 15.7 Hz, 1H), 2.44 (s, 3H), 2.27 (d,  $J$  = 6.7 Hz, 9H).  $^{13}\text{C}\{^1\text{H}\}$  NMR ( $\text{CDCl}_3$ , 125 MHz)  $\delta$  144.4, 140.4, 139.4, 138.1, 137.6, 135.8, 132.2, 130.1, 129.9, 129.5, 128.7, 127.7, 29.8, 21.7, 21.2, 21.1.

**(E)-1,2,3,4,5-Pentafluoro-6-(2-tosylvinyl)benzene (27)**<sup>13</sup>

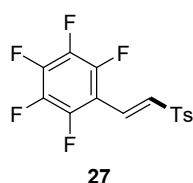

Prepared according to the general procedure using 1,2,3,4,5-pentafluoro-6-vinylbenzene (42  $\mu\text{L}$ , 0.3 mmol), TsCN (326.2 mg, 1.8 mmol),  $\text{H}_2\text{O}$  (16  $\mu\text{L}$ , 0.9 mmol) and DMF (3.0 mL). The mixture was stirred at room temperature for 48 h and purified

by column chromatography (acetone/petroleum ether = 1:15) on silica gel to afford product **27** as a colorless solid (93.3 mg, 89% yield).  $^1\text{H}$  NMR ( $\text{CDCl}_3$ , 500 MHz)  $\delta$  7.82 (d,  $J = 8.4$  Hz, 2H), 7.65 (d,  $J = 15.8$  Hz, 1H), 7.37 (d,  $J = 7.9$  Hz, 2H), 7.21 (d,  $J = 15.8$  Hz, 1H), 2.45 (s, 3H).  $^{13}\text{C}\{^1\text{H}\}$  NMR ( $\text{CDCl}_3$ , 125 MHz)  $\delta$  146.7(dm,  $^1J_{\text{C-F}} = 257.0$  Hz), 145.2(s), 143.4(dm,  $^1J_{\text{C-F}} = 258.5$  Hz), 138.8(dm,  $^1J_{\text{C-F}} = 252.4$  Hz), 136.5(s), 135.7(tm,  $^3J_{\text{C-F}} = 8.6$  Hz), 130.2(s), 128.1(s), 125.3(s), 108.2(dt,  $^2J_{\text{C-F}} = 16.3$  Hz,  $^3J_{\text{C-F}} = 3.8$  Hz), 21.7(s).  $^{19}\text{F}$  NMR ( $\text{CDCl}_3$ , 471 MHz)  $\delta$  -138.19 – -138.35 (m, 2F), -148.86 – -149.03 (m, 1F), -160.75 (td,  $J = 19.5, 6.1$  Hz, 2F).

### 3-Tosyl-1,2,4a,8a-tetrahydronaphthalene (**28**)<sup>14</sup>

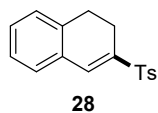

Prepared according to the general procedure using 1,2-dihydronaphthalene (35  $\mu\text{L}$ , 0.3 mmol), TsCN (326.2 mg, 1.8 mmol),  $\text{H}_2\text{O}$  (16  $\mu\text{L}$ , 0.9 mmol), and DMF (3.0 mL). The mixture was stirred at room temperature for 48 h and purified by column chromatography (acetone/petroleum ether = 1:15) on silica gel to afford product **28** as a colorless solid (58.1 mg, 68% yield).  $^1\text{H}$  NMR ( $\text{CDCl}_3$ , 400 MHz)  $\delta$  7.80 (d,  $J = 8.3$  Hz, 2H), 7.56 (s, 1H), 7.33 (d,  $J = 8.0$  Hz, 2H), 7.28–7.22 (m, 3H), 7.12 (d,  $J = 7.0$  Hz, 1H), 2.86 (t,  $J = 8.3$  Hz, 2H), 2.49 (t,  $J = 8.3$  Hz, 2H), 2.43 (s, 3H).  $^{13}\text{C}\{^1\text{H}\}$  NMR ( $\text{CDCl}_3$ , 100 MHz)  $\delta$  144.3, 138.5, 136.6, 135.6, 134.8, 131.1, 130.4, 129.9, 129.0, 128.0, 127.8, 127.2, 27.6, 21.7, 21.6.

### (*E*)-1-Methyl-4-((2-phenylprop-1-en-1-yl)sulfonyl)benzene (**29**)<sup>15</sup>

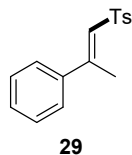

Prepared according to the general procedure using prop-1-en-2-ylbenzene (39  $\mu\text{L}$ , 0.3 mmol), TsCN (326.2 mg, 1.8 mmol),  $\text{H}_2\text{O}$  (16  $\mu\text{L}$ , 0.9 mmol), and DMF (3.0 mL). The mixture was stirred at room temperature for 72 h and purified by column chromatography (acetone/petroleum ether = 1:45) on silica gel to afford product **29** as

a colorless solid (60.4 mg, 74% yield).  $^1\text{H}$  NMR ( $\text{CDCl}_3$ , 400 MHz)  $\delta$  7.85 (d,  $J = 8.3$  Hz, 2H), 7.40–7.33 (m, 7H), 6.60 (q,  $J = 1.3$  Hz, 1H), 2.52 (d,  $J = 1.3$  Hz, 3H), 2.44 (s, 3H).  $^{13}\text{C}\{^1\text{H}\}$  NMR ( $\text{CDCl}_3$ , 100 MHz)  $\delta$  153.0, 144.2, 140.2, 139.3, 129.9, 129.8, 128.7, 127.8, 127.3, 126.3, 21.6, 17.2.

**(2-Tosylethene-1,1-diyl)dibenzene (30)**<sup>15</sup>

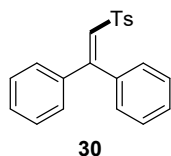

Prepared according to the general procedure using ethene-1,1-diylidibenzene (53  $\mu\text{L}$ , 0.3 mmol), TsCN (326.2 mg, 1.8 mmol),  $\text{H}_2\text{O}$  (16  $\mu\text{L}$ , 0.9 mmol), and DMF (3.0 mL). The mixture was stirred at room temperature for 72 h and purified by column chromatography (acetone/petroleum ether = 1:45) on silica gel to afford product **30** as a colorless solid (79.3 mg, 79% yield).  $^1\text{H}$  NMR ( $\text{CDCl}_3$ , 400 MHz)  $\delta$  7.47 (d,  $J = 8.3$  Hz, 2H), 7.40–7.34 (m, 2H), 7.33–7.27 (m, 4H), 7.23–7.18 (m, 2H), 7.17–7.13 (m, 2H), 7.12–7.07 (m, 2H), 6.99 (s, 1H), 2.38 (s, 3H).  $^{13}\text{C}\{^1\text{H}\}$  NMR ( $\text{CDCl}_3$ , 100 MHz)  $\delta$  154.7, 143.8, 139.2, 138.6, 135.6, 130.2, 129.8, 129.3, 129.0, 128.9, 128.6, 128.2, 127.8, 127.7, 21.6.

**(E)-2-(2-Tosylvinyl)pyridine (31)**<sup>11</sup>

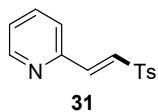

Prepared according to the general procedure using 2-vinylpyridine (32  $\mu\text{L}$ , 0.3 mmol), TsCN (326.2 mg, 1.8 mmol),  $\text{H}_2\text{O}$  (16  $\mu\text{L}$ , 0.9 mmol), and DMF (3.0 mL). The mixture was stirred at room temperature for 56 h and purified by column chromatography (acetone/petroleum ether = 1:5) on silica gel to afford product **31** as a colorless solid (50.6 mg, 65% yield).  $^1\text{H}$  NMR ( $\text{CDCl}_3$ , 500 MHz)  $\delta$  8.60 (d,  $J = 4.7$  Hz, 1H), 7.84 (d,  $J = 7.9$  Hz, 2H), 7.73 (t,  $J = 7.7$  Hz, 1H), 7.62 (d,  $J = 14.9$  Hz, 1H), 7.46–7.37 (m, 2H), 7.34 (d,  $J = 7.9$  Hz, 2H), 7.31–7.26 (m, 1H), 2.43 (s, 3H).  $^{13}\text{C}\{^1\text{H}\}$  NMR ( $\text{CDCl}_3$ , 125

MHz)  $\delta$  151.2, 150.3, 144.6, 140.0, 137.3, 137.0, 132.2, 130.0, 128.0, 125.4, 124.9, 21.6.

**(E)-1-Methyl-4-(pent-1-en-1-ylsulfonyl)benzene (32)**<sup>16</sup>

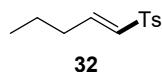

Prepared according to the general procedure using pent-1-ene (33  $\mu$ L, 0.3 mmol), TsCN (326.2 mg, 1.8 mmol), H<sub>2</sub>O (16  $\mu$ L, 0.9 mmol), and DMF (3.0 mL). The mixture was stirred at room temperature for 56 h and purified by column chromatography (acetone/petroleum ether = 1:15) on silica gel to afford product **32** as a colorless solid (38.5 mg, 57% yield). <sup>1</sup>H NMR (CDCl<sub>3</sub>, 400 MHz)  $\delta$  7.75 (d,  $J$  = 8.3 Hz, 2H), 7.32 (d,  $J$  = 8.4 Hz, 2H), 6.94 (dt,  $J$  = 15.1, 6.8 Hz, 1H), 6.29 (dt,  $J$  = 15.1, 1.6 Hz, 1H), 2.42 (s, 3H), 2.19 (qd,  $J$  = 7.3, 1.6 Hz, 2H), 1.55–1.41 (m, 2H), 0.91 (t,  $J$  = 7.4 Hz, 3H). <sup>13</sup>C{<sup>1</sup>H} NMR (CDCl<sub>3</sub>, 100 MHz)  $\delta$  146.4, 144.2, 137.8, 130.7, 129.9, 127.6, 33.4, 21.6, 20.9, 13.6.

**(E)-1-Methyl-4-((4-phenylbut-1-en-1-yl)sulfonyl)benzene (33)**<sup>17</sup>

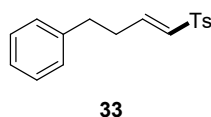

Prepared according to the general procedure using but-3-en-1-ylbenzene (42  $\mu$ L, 0.3 mmol), TsCN (326.2 mg, 1.8 mmol), H<sub>2</sub>O (16  $\mu$ L, 0.9 mmol), and DMF (3.0 mL). The mixture was stirred at room temperature for 56 h and purified by column chromatography (acetone/petroleum ether = 1:15) on silica gel to afford product **33** as a colorless solid (61.9 mg, 72% yield). <sup>1</sup>H NMR (CDCl<sub>3</sub>, 400 MHz)  $\delta$  7.70 (d,  $J$  = 8.2 Hz, 2H), 7.31 (d,  $J$  = 8.1 Hz, 2H), 7.29–7.22 (m, 2H), 7.22–7.16 (m, 1H), 7.14–7.09 (m, 2H), 6.97 (dt,  $J$  = 15.1, 6.8 Hz, 1H), 6.28 (d,  $J$  = 15.1 Hz, 1H), 2.77 (t,  $J$  = 7.6 Hz, 2H), 2.60–2.49 (m, 2H), 2.44 (s, 3H). <sup>13</sup>C{<sup>1</sup>H} NMR (CDCl<sub>3</sub>, 100 MHz)  $\delta$  145.3, 144.2, 140.0, 137.6, 131.3, 129.9, 128.6, 128.3, 127.6, 126.4, 33.9, 33.1, 21.6.

**1-((2-Ethylbut-1-en-1-yl)sulfonyl)-4-methylbenzene (34)**<sup>16</sup>

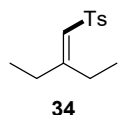

Prepared according to the general procedure using 3-methylenepentane (37  $\mu$ L, 0.3 mmol), TsCN (326.2 mg, 1.8 mmol), H<sub>2</sub>O (16  $\mu$ L, 0.9 mmol), and DMF (3.0 mL). The mixture was stirred at room temperature for 72 h and purified by column chromatography (acetone/petroleum ether = 1:45) on silica gel to afford product **34** as a colorless solid (44.6 mg, 62% yield). <sup>1</sup>H NMR (CDCl<sub>3</sub>, 600 MHz)  $\delta$  7.79 (d,  $J$  = 8.3 Hz, 2H), 7.32 (d,  $J$  = 7.8 Hz, 2H), 6.09 (s, 1H), 2.60 (q,  $J$  = 7.5 Hz, 2H), 2.43 (s, 3H), 2.18 (qd,  $J$  = 7.4, 1.5 Hz, 2H), 1.02 (t,  $J$  = 7.5 Hz, 6H). <sup>13</sup>C{<sup>1</sup>H} NMR (CDCl<sub>3</sub>, 150 MHz)  $\delta$  163.8, 143.8, 139.8, 129.7, 127.2, 124.8, 29.9, 24.5, 21.6, 12.8, 11.6.

**(E)-1-((2-Cyclohexylvinyl)sulfonyl)-4-methylbenzene (35)**<sup>18</sup>

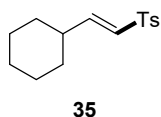

Prepared according to the general procedure using vinylcyclohexane (41  $\mu$ L, 0.3 mmol), TsCN (326.2 mg, 1.8 mmol), H<sub>2</sub>O (16  $\mu$ L, 0.9 mmol), and DMF (3.0 mL). The mixture was stirred at room temperature for 56 h and purified by column chromatography (acetone/petroleum ether = 1:45) on silica gel to afford product **35** as a colorless solid (50.2 mg, 63% yield). <sup>1</sup>H NMR (CDCl<sub>3</sub>, 400 MHz)  $\delta$  7.75 (d,  $J$  = 8.3 Hz, 2H), 7.32 (d,  $J$  = 7.9 Hz, 2H), 6.92 (dd,  $J$  = 15.2, 6.4 Hz, 1H), 6.23 (dd,  $J$  = 15.2, 1.5 Hz, 1H), 2.43 (s, 3H), 2.22-2.21 (m, 1H), 1.81-1.70 (m, 4H), 1.33-1.18 (m, 3H), 1.18-1.06 (m, 3H). <sup>13</sup>C{<sup>1</sup>H} NMR (CDCl<sub>3</sub>, 100 MHz)  $\delta$  151.2, 144.1, 137.9, 129.9, 128.6, 127.6, 39.8, 31.3, 25.7, 25.6, 21.6.

**1-(Cyclopent-1-en-1-ylsulfonyl)-4-methylbenzene (36)**<sup>14</sup>

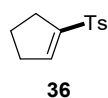

Prepared according to the general procedure using cyclopentene (27  $\mu$ L, 0.3 mmol), TsCN (326.2 mg, 1.8 mmol), H<sub>2</sub>O (16  $\mu$ L, 0.9 mmol), and DMF (3.0 mL). The mixture was stirred at room temperature for 56 h and purified by column chromatography

(acetone/petroleum ether = 1:20) on silica gel to afford product **36** as a colorless solid (50.7mg, 76% yield).  $^1\text{H}$  NMR ( $\text{CDCl}_3$ , 400 MHz)  $\delta$  7.77 (d,  $J = 8.3$  Hz, 2H), 7.33 (d,  $J = 8.1$  Hz, 2H), 6.71 (q,  $J = 2.2, 1.6$  Hz, 1H), 2.55–2.49 (m, 4H), 2.43 (s, 3H), 2.06–1.97 (m, 2H).  $^{13}\text{C}\{^1\text{H}\}$  NMR ( $\text{CDCl}_3$ , 100 MHz)  $\delta$  144.9, 144.3, 142.8, 136.7, 129.8, 128.0, 32.9, 30.8, 23.6, 21.6.

### (*E*)-6-Tosylhex-5-en-2-one (**37**)

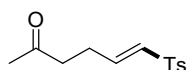

**37**

Prepared according to the general procedure using hex-5-en-2-one (33  $\mu\text{L}$ , 0.3 mmol), TsCN (326.2 mg, 1.8 mmol),  $\text{H}_2\text{O}$  (16  $\mu\text{L}$ , 0.9 mmol), and DMF (3.0 mL). The mixture was stirred at room temperature for 56 h and purified by column chromatography (acetone/petroleum ether = 1:20) on silica gel to afford product **37** as a colorless oil (53.8 mg, 71% yield).  $^1\text{H}$  NMR ( $\text{CDCl}_3$ , 400 MHz)  $\delta$  7.74 (d,  $J = 8.3$  Hz, 2H), 7.33 (d,  $J = 7.7$  Hz, 2H), 6.92 (dt,  $J = 15.1, 6.7$  Hz, 1H), 6.32 (dt,  $J = 15.1, 1.5$  Hz, 1H), 2.61 (t,  $J = 7.5$  Hz, 2H), 2.49 (q,  $J = 7.0, 6.5$  Hz, 2H), 2.44 (s, 3H), 2.15 (s, 3H).  $^{13}\text{C}\{^1\text{H}\}$  NMR ( $\text{CDCl}_3$ , 100 MHz)  $\delta$  206.2, 144.5, 144.4, 137.4, 131.5, 129.9, 127.7, 41.0, 29.9, 25.2, 21.6. HR-ESI-MS ( $m/z$ ): calcd. for  $\text{C}_{13}\text{H}_{17}\text{O}_3\text{S}$   $[\text{M} + \text{H}]^+$ , 253.0893, found 253.0896.

### Methyl (*E*)-2-(2-tosylvinyl)nonanoate (**38**)

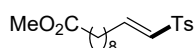

**38**

Prepared according to the general procedure using methyl 2-vinylnonanoate (67  $\mu\text{L}$ , 0.3 mmol), TsCN (326.2 mg, 1.8 mmol),  $\text{H}_2\text{O}$  (16  $\mu\text{L}$ , 0.9 mmol), and DMF (3.0 mL). The mixture was stirred at room temperature for 56 h and purified by column chromatography (acetone/petroleum ether = 1:10) on silica gel to afford product **38** as a colorless solid (74.5 mg, 70% yield), m.p.: 86–88  $^\circ\text{C}$ .  $^1\text{H}$  NMR ( $\text{CDCl}_3$ , 400 MHz)  $\delta$  7.73 (d,  $J = 8.3$  Hz, 2H), 7.31 (d,  $J = 7.7$  Hz, 2H), 6.93 (dt,  $J = 15.1, 6.8$  Hz, 1H), 6.27 (dt,  $J = 15.1, 1.6$  Hz, 1H), 3.65 (s, 3H), 2.42 (s, 3H), 2.28 (t,  $J = 7.5$  Hz, 2H), 2.23–2.16 (m, 2H), 1.63–1.54 (m, 2H), 1.48–1.36 (m, 2H), 1.30–1.22 (m, 8H).  $^{13}\text{C}\{^1\text{H}\}$  NMR

(CDCl<sub>3</sub>, 100 MHz)  $\delta$  174.3, 146.6, 144.2, 137.8, 130.6, 129.9, 127.6, 51.5, 34.0, 31.4, 29.04, 29.01, 28.9, 27.5, 24.9, 21.6. HR-ESI-MS (m/z): calcd. for C<sub>19</sub>H<sub>29</sub>O<sub>4</sub>S [M + H]<sup>+</sup>, 353.1781, found 353.1786.

### Dimethyl (*E*)-2-(3-tosylallyl)malonate (**39**)

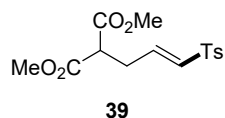

Prepared according to the general procedure using dimethyl 2-allylmalonate (48  $\mu$ L, 0.3 mmol), TsCN (326.2 mg, 1.8 mmol), H<sub>2</sub>O (16  $\mu$ L, 0.9 mmol), and DMF (3.0 mL). The mixture was stirred at room temperature for 56 h and purified by column chromatography (acetone/petroleum ether = 1:10) on silica gel to afford product **39** as a colorless oil (92.0 mg, 94% yield). <sup>1</sup>H NMR (CDCl<sub>3</sub>, 400 MHz)  $\delta$  7.72 (d, *J* = 8.3 Hz, 2H), 7.32 (d, *J* = 8.5 Hz, 2H), 6.86 (dt, *J* = 15.1, 7.2 Hz, 1H), 6.38 (dt, *J* = 15.1, 1.4 Hz, 1H), 3.69 (s, 6H), 3.51 (t, *J* = 7.4 Hz, 1H), 2.79 (td, *J* = 7.3, 1.5 Hz, 2H), 2.42 (s, 3H). <sup>13</sup>C{<sup>1</sup>H} NMR (CDCl<sub>3</sub>, 100 MHz)  $\delta$  168.3, 144.5, 141.0, 137.1, 133.5, 129.9, 127.7, 52.9, 49.9, 30.3, 21.6. HR-ESI-MS (m/z): calcd. for C<sub>15</sub>H<sub>19</sub>O<sub>6</sub>S [M + H]<sup>+</sup> 327.0897, found 327.0897.

### Methyl (*E*)-(3-tosylallyl) carbonate (**40**)

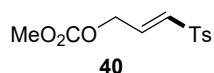

Prepared according to the general procedure using allyl methyl carbonate (34  $\mu$ L, 0.3 mmol), TsCN (326.2 mg, 1.8 mmol), H<sub>2</sub>O (16  $\mu$ L, 0.9 mmol), and DMF (3.0 mL). The mixture was stirred at room temperature for 56 h and purified by column chromatography (acetone/petroleum ether = 1:10) on silica gel to afford product **40** as a colorless solid (49.6 mg, 61% yield), m.p.: 88–90 °C. <sup>1</sup>H NMR (CDCl<sub>3</sub>, 400 MHz)  $\delta$  7.75 (d, *J* = 8.3 Hz, 2H), 7.33 (d, *J* = 8.1 Hz, 2H), 6.93 (dt, *J* = 15.1, 3.9 Hz, 1H), 6.58 (dt, *J* = 15.1, 2.1 Hz, 1H), 4.82 (dd, *J* = 3.9, 2.1 Hz, 2H), 3.79 (s, 3H), 2.43 (s, 3H). <sup>13</sup>C{<sup>1</sup>H} NMR (CDCl<sub>3</sub>, 100 MHz)  $\delta$  154.9, 144.8, 137.9, 136.8, 131.9, 130.0, 127.9,

64.7, 55.3, 21.6. HR-ESI-MS ( $m/z$ ): calcd. for  $C_{12}H_{15}O_5S$   $[M + H]^+$ , 271.0635, found 271.0632.

**(*E*)-1-Methyl-4-((3-phenoxyprop-1-en-1-yl)sulfonyl)benzene (41)**<sup>19</sup>

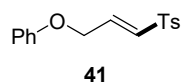

Prepared according to the general procedure using (allyloxy)benzene (40  $\mu$ L, 0.3 mmol), TsCN (326.2 mg, 1.8 mmol),  $H_2O$  (16  $\mu$ L, 0.9 mmol), and DMF (3.0 mL). The mixture was stirred at room temperature for 56 h and purified by column chromatography (acetone/petroleum ether = 1:10) on silica gel to afford product **41** as a colorless solid (68.5 mg, 79% yield).  $^1H$  NMR ( $CDCl_3$ , 400 MHz)  $\delta$  7.78 (d,  $J = 8.1$  Hz, 2H), 7.34 (d,  $J = 8.0$  Hz, 2H), 7.31–7.24 (m, 2H), 7.09 (dt,  $J = 15.0, 3.4$  Hz, 1H), 6.97 (t,  $J = 7.4$  Hz, 1H), 6.86 (d,  $J = 8.2$  Hz, 2H), 6.76 (d,  $J = 15.0$  Hz, 1H), 4.71 (d,  $J = 2.7$  Hz, 2H), 2.43 (s, 3H).  $^{13}C\{^1H\}$  NMR ( $CDCl_3$ , 100 MHz)  $\delta$  157.6, 144.6, 140.1, 137.2, 131.5, 130.0, 129.7, 127.8, 121.7, 114.6, 65.5, 21.6.

**(*E*)-1-((2-(*tert*-Butoxy)vinyl)sulfonyl)-4-methylbenzene (42)**

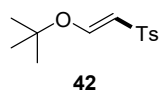

Prepared according to the general procedure using 2-methyl-2-(vinyl)oxypropane (39  $\mu$ L, 0.3 mmol), TsCN (326.2 mg, 1.8 mmol),  $H_2O$  (16  $\mu$ L, 0.9 mmol), and DMF (3.0 mL). The mixture was stirred at room temperature for 48 h and purified by column chromatography (acetone/petroleum ether = 1:30) on silica gel to afford product **42** as a colorless oil (59.1 mg, 78% yield).  $^1H$  NMR ( $CDCl_3$ , 500 MHz)  $\delta$  7.73 (d,  $J = 8.3$  Hz, 2H), 7.63 (d,  $J = 11.6$  Hz, 1H), 7.29 (d,  $J = 8.0$  Hz, 2H), 5.75 (d,  $J = 11.6$  Hz, 1H), 2.41 (s, 3H), 1.37 (s, 9H).  $^{13}C\{^1H\}$  NMR ( $CDCl_3$ , 125 MHz)  $\delta$  156.3, 143.4, 139.9, 129.7, 126.8, 108.4, 81.3, 28.1, 21.5. HR-ESI-MS ( $m/z$ ): calcd. for  $C_{13}H_{19}O_3S$   $[M + H]^+$ , 255.1049, found 255.1050.

**(*E*)-1-((2-Isobutoxyvinyl)sulfonyl)-4-methylbenzene (43)**



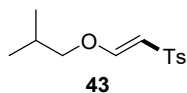

Prepared according to the general procedure using 2-methyl-1-(vinylloxy)propane (39  $\mu\text{L}$ , 0.3 mmol), TsCN (326.2 mg, 1.8 mmol),  $\text{H}_2\text{O}$  (16  $\mu\text{L}$ , 0.9 mmol), and DMF (3.0 mL). The mixture was stirred at room temperature for 48 h and purified by column chromatography (acetone/petroleum ether = 1:30) on silica gel to afford product **43** as a colorless oil (54.6 mg, 72% yield).  $^1\text{H}$  NMR ( $\text{CDCl}_3$ , 500 MHz)  $\delta$  7.75 (d,  $J = 8.3$  Hz, 2H), 7.58 (d,  $J = 12.2$  Hz, 1H), 7.30 (d,  $J = 8.0$  Hz, 2H), 5.66 (d,  $J = 12.2$  Hz, 1H), 3.57 (d,  $J = 6.5$  Hz, 2H), 2.42 (s, 3H), 2.03–1.92 (m, 1H), 0.93 (d,  $J = 6.7$  Hz, 6H).  $^{13}\text{C}\{^1\text{H}\}$  NMR ( $\text{CDCl}_3$ , 125 MHz)  $\delta$  160.7, 143.6, 139.8, 129.8, 130.0, 106.7, 78.1, 28.0, 21.6, 18.8. HR-ESI-MS ( $m/z$ ): calcd. for  $\text{C}_{13}\text{H}_{19}\text{O}_3\text{S}$   $[\text{M} + \text{H}]^+$ , 255.1049, found 255.1047.

**(E)-1-((2-Butoxyvinyl)sulfonyl)-4-methylbenzene (44)**<sup>20</sup>

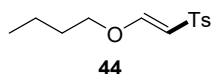

Prepared according to the general procedure using 1-(vinylloxy)butane (39  $\mu\text{L}$ , 0.3 mmol), TsCN (326.2 mg, 1.8 mmol),  $\text{H}_2\text{O}$  (16  $\mu\text{L}$ , 0.9 mmol), and DMF (3.0 mL). The mixture was stirred at room temperature for 48 h and purified by column chromatography (acetone/petroleum ether = 1:30) on silica gel to afford product **44** as a colorless solid (50.8 mg, 67% yield).  $^1\text{H}$  NMR ( $\text{CDCl}_3$ , 600 MHz)  $\delta$  7.76 (d,  $J = 8.3$  Hz, 2H), 7.58 (d,  $J = 12.2$  Hz, 1H), 7.31 (d,  $J = 7.9$  Hz, 2H), 5.67 (d,  $J = 12.2$  Hz, 1H), 3.81 (t,  $J = 6.5$  Hz, 2H), 2.43 (s, 3H), 1.73–1.62 (m, 2H), 1.43–1.35 (m, 2H), 0.93 (t,  $J = 7.4$  Hz, 3H).  $^{13}\text{C}\{^1\text{H}\}$  NMR ( $\text{CDCl}_3$ , 150 MHz)  $\delta$  160.6, 143.6, 139.8, 129.7, 127.0, 106.8, 71.7, 30.7, 21.6, 18.9, 13.6.

**(E)-1-((2-(Cyclohexyloxy)vinyl)sulfonyl)-4-methylbenzene (45)**

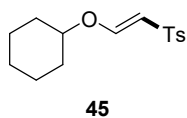

Prepared according to the general procedure using (vinylloxy)cyclohexane (44  $\mu\text{L}$ , 0.3 mmol), TsCN (326.2 mg, 1.8 mmol),  $\text{H}_2\text{O}$  (16  $\mu\text{L}$ , 0.9 mmol), and DMF (3.0 mL). The

mixture was stirred at room temperature for 48 h and purified by column chromatography (acetone/petroleum ether = 1:30) on silica gel to afford product **45** as a colorless solid (66.5 mg, 79% yield), m.p.: 110–112 °C. <sup>1</sup>H NMR (CDCl<sub>3</sub>, 600 MHz) δ 7.74 (d, *J* = 8.3 Hz, 2H), 7.52 (d, *J* = 12.0 Hz, 1H), 7.30 (d, *J* = 8.0 Hz, 2H), 5.71 (d, *J* = 12.0 Hz, 1H), 3.97–3.90 (m, 1H), 2.42 (s, 3H), 1.94–1.85 (m, 2H), 1.77–1.69 (m, 2H), 1.56–1.43 (m, 3H), 1.37–1.21 (m, 3H). <sup>13</sup>C {<sup>1</sup>H} NMR (CDCl<sub>3</sub>, 150 MHz) δ 159.7, 143.4, 139.9, 129.7, 126.9, 107.2, 82.1, 31.7, 25.1, 23.4, 21.5. HR-ESI-MS (*m/z*): calcd. for C<sub>15</sub>H<sub>21</sub>O<sub>3</sub>S [M + H]<sup>+</sup>, 281.1206, found 281.1206.

#### 5-Tosyl-3,4-dihydro-2H-pyran (**46**)

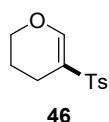

Prepared according to the general procedure using 5-tosyl-3,4-dihydro-2H-pyran (27 μL, 0.30 mmol), TsCN (326.2 mg, 1.8 mmol), H<sub>2</sub>O (16 μL, 0.9 mmol), and DMF (3.0 mL). The mixture was stirred at room temperature for 48 h and purified by column chromatography (acetone/petroleum ether = 1:30) on silica gel to afford product **46** as a colorless solid (50.2 mg, 70% yield), m.p.: 125–127 °C. <sup>1</sup>H NMR (CDCl<sub>3</sub>, 600 MHz) δ 7.73 (d, *J* = 8.3 Hz, 2H), 7.60 (s, 1H), 7.31 (d, *J* = 8.0 Hz, 2H), 4.03–3.98 (m, 2H), 2.43 (s, 3H), 2.17–2.15 (m, 2H), 1.90–1.82 (m, 2H). <sup>13</sup>C {<sup>1</sup>H} NMR (CDCl<sub>3</sub>, 150 MHz) δ 153.4, 143.7, 137.7, 129.7, 127.5, 115.5, 66.5, 21.5, 20.8, 18.9. HR-ESI-MS (*m/z*): calcd. for C<sub>12</sub>H<sub>15</sub>O<sub>3</sub>S [M + H]<sup>+</sup>, 239.0736 found 239.0732.

#### 4-Tosyl-2,3-dihydrofuran (**47**)<sup>21</sup>

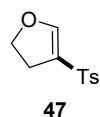

Prepared according to the general procedure using 2,3-dihydrofuran (23 μL, 0.3 mmol), TsCN (326.2 mg, 1.8 mmol), H<sub>2</sub>O (16 μL, 0.9 mmol), and DMF (3.0 mL). The mixture was stirred at room temperature for 48 h and purified by column chromatography (acetone/petroleum ether = 1:30) on silica gel to afford product **47** as a colorless solid

(42.5 mg, 63% yield).  $^1\text{H}$  NMR ( $\text{CDCl}_3$ , 400 MHz)  $\delta$  7.78 (d,  $J = 8.3$  Hz, 2H), 7.34 (d,  $J = 7.7$  Hz, 2H), 7.20 (s, 1H), 4.61 (t,  $J = 9.8$  Hz, 2H), 2.79 (td,  $J = 9.8, 1.8$  Hz, 2H), 2.44 (s, 3H).  $^{13}\text{C}\{^1\text{H}\}$  NMR ( $\text{CDCl}_3$ , 100 MHz,)  $\delta$  156.4, 144.0, 137.8, 129.8, 127.3, 117.6, 74.0, 28.1, 21.6.

**(E)-Phenyl(2-tosylvinyl)sulfane (48)**<sup>22</sup>

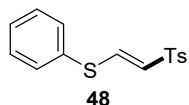

Prepared according to the general procedure using phenyl(vinyl)sulfane (39  $\mu\text{L}$ , 0.3 mmol), TsCN (326.2 mg, 1.8 mmol),  $\text{H}_2\text{O}$  (16  $\mu\text{L}$ , 0.9 mmol), and DMF (3.0 mL). The mixture was stirred at room temperature for 48 h and purified by column chromatography (acetone/petroleum ether = 1:30) on silica gel to afford product **48** as a colorless solid (63.7 mg, 73% yield).  $^1\text{H}$  NMR ( $\text{CDCl}_3$ , 500 MHz)  $\delta$  7.79 (d,  $J = 14.5$  Hz, 1H), 7.70 (d,  $J = 8.0$  Hz, 2H), 7.47–7.39 (m, 5H), 7.30 (d,  $J = 8.0$  Hz, 2H), 5.98 (d,  $J = 14.5$  Hz, 1H), 2.42 (s, 3H).  $^{13}\text{C}\{^1\text{H}\}$  NMR ( $\text{CDCl}_3$ , 125 MHz)  $\delta$  145.6, 144.1, 138.0, 133.4, 130.0, 129.9, 129.8, 129.2, 127.4, 123.5, 21.6.

**(E)-Ethyl(2-tosylvinyl)sulfane (49)**

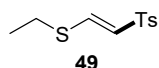

Prepared according to the general procedure using ethyl(vinyl)sulfane (30  $\mu\text{L}$ , 0.3 mmol), TsCN (326.2 mg, 1.8 mmol),  $\text{H}_2\text{O}$  (16  $\mu\text{L}$ , 0.9 mmol), and DMF (3.0 mL). The mixture was stirred at room temperature for 48 h and purified by column chromatography (acetone/petroleum ether = 1:30) on silica gel to afford product **49** as white foam (51.6 mg, 71% yield).  $^1\text{H}$  NMR ( $\text{CDCl}_3$ , 600 MHz)  $\delta$  7.75 (d,  $J = 8.4$  Hz, 2H), 7.70 (d,  $J = 14.6$  Hz, 1H), 7.32 (d,  $J = 7.9$  Hz, 2H), 6.12 (d,  $J = 14.6$  Hz, 1H), 2.79 (q,  $J = 7.4$  Hz, 2H), 2.43 (s, 3H), 1.35–1.30 (m, 3H).  $^{13}\text{C}\{^1\text{H}\}$  NMR ( $\text{CDCl}_3$ , 150 MHz,)  $\delta$  145.0, 144.0, 138.4, 129.9, 127.4, 122.0, 26.4, 21.6, 13.5. HR-ESI-MS ( $m/z$ ): calcd. for  $\text{C}_{11}\text{H}_{15}\text{O}_2\text{S}_2$  [ $\text{M} + \text{H}$ ] $^+$ , 243.0508, found 243.0507.

### Ethyl (*E*)-3-tosylacrylate (**50**)<sup>23</sup>

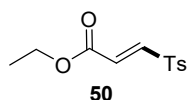

Prepared according to the general procedure using ethyl acrylate (33  $\mu$ L, 0.3 mmol), TsCN (326.2 mg, 1.8 mmol), H<sub>2</sub>O (16  $\mu$ L, 0.9 mmol), and DMF (3.0 mL). The mixture was stirred at room temperature for 48 h and purified by column chromatography (acetone/petroleum ether = 1:20) on silica gel to afford product **50** as a colorless solid (47.3 mg, 62% yield). <sup>1</sup>H NMR (CDCl<sub>3</sub>, 600 MHz)  $\delta$  7.80 (d, *J* = 8.3 Hz, 2H), 7.38 (d, *J* = 7.7 Hz, 2H), 7.31 (d, *J* = 15.1 Hz, 1H), 6.79 (d, *J* = 15.1 Hz, 1H), 4.24 (q, *J* = 7.1 Hz, 2H), 2.46 (s, 3H), 1.30 (t, *J* = 7.1 Hz, 3H). <sup>13</sup>C{<sup>1</sup>H} NMR (CDCl<sub>3</sub>, 150 MHz)  $\delta$  163.5, 145.6, 143.5, 135.6, 130.5, 130.3, 128.4, 62.0, 21.7, 14.0.

### 1-Methyl-4-(((4-(prop-1-en-2-yl) cyclohex-1-en-1-yl) methyl) sulfonyl) benzene (**51**)

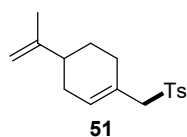

Prepared according to the general procedure using (1*S*,5*S*)-6,6-dimethyl-2-methylenebicyclo [3.1.1] heptane (47  $\mu$ L, 0.3 mmol), TsCN (326.2 mg, 1.8 mmol), H<sub>2</sub>O (16  $\mu$ L, 0.9 mmol), and DMF (3.0 mL). The mixture was stirred at 80 °C for 56 h and purified by column chromatography (acetone/petroleum ether = 1:30) on silica gel to afford product **51** as a colorless solid (81.1 mg, 93% yield), m.p.: 178–180 °C. <sup>1</sup>H NMR (CDCl<sub>3</sub>, 400 MHz)  $\delta$  7.73 (d, *J* = 8.2 Hz, 2H), 7.34 (d, *J* = 8.0 Hz, 2H), 5.44 (dd, *J* = 4.8, 2.4 Hz, 1H), 4.73 (d, *J* = 1.7 Hz, 2H), 3.68 (s, 2H), 2.45 (s, 3H), 2.23–2.13 (m, 2H), 2.13–1.99 (m, 2H), 1.94–1.75 (m, 2H), 1.71 (s, 3H), 1.49–1.34 (m, 1H). <sup>13</sup>C{<sup>1</sup>H} NMR (CDCl<sub>3</sub>, 100 MHz)  $\delta$  149.1, 144.5, 135.7, 132.2, 129.5, 128.5, 125.9, 108.9, 64.5, 40.1, 31.0, 29.1, 27.5, 21.7, 20.8. HR-ESI-MS (*m/z*): calcd. for C<sub>17</sub>H<sub>22</sub>O<sub>2</sub>SNa [M + Na]<sup>+</sup>, 313.1233 found 313.1233.

### General procedure for the arylsulfonylation of alkenes

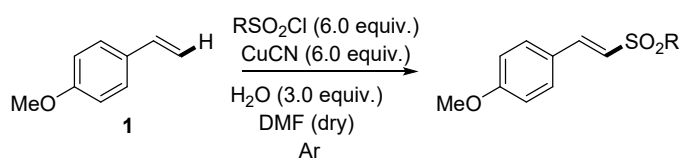

To an oven dried 10 mL glass tube with a magnetic stirring bar was added CuCN (1.8 mmol, 6.0 equiv.) and sulfonyl chloride (1.8 mmol, 6.0 equiv.) in DMF (3.0 mL) under argon. After the mixture was stirred for 30 min at room temperature, *p*-methoxystyrene **1** (40  $\mu$ L, 0.3 mmol) and H<sub>2</sub>O (0.9 mmol, 3.0 equiv.) were added. The mixture was stirred for 24 h at room temperature. Then the reaction mixture was diluted with ethyl acetate followed by addition of water and filtered. The filter liquor was washed with water (15 mL  $\times$  3), followed by NaHCO<sub>3</sub> aq. and brine. After dried over anhydrous Na<sub>2</sub>SO<sub>4</sub> and concentrated, the crude product was subjected to column chromatography (acetone/petroleum ether = 1:30) on silica gel to afford desired product.

**(*E*)-1-Methoxy-4-(2-(phenylsulfonyl)vinyl)benzene<sup>24</sup>**

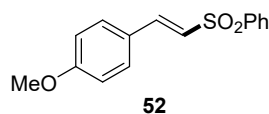

Prepared according to the general procedure using *p*-methoxystyrene **1** (40  $\mu$ L, 0.3 mmol), CuCN (161.2 mg, 1.8 mmol), benzenesulfonyl chloride (0.23 mL, 1.8 mmol), H<sub>2</sub>O (16  $\mu$ L, 0.9 mmol), and DMF (3.0 mL). The mixture was stirred at room temperature for 24 h and purified by column chromatography (acetone/petroleum ether = 1:30) on silica gel to afford product **52** as a colorless solid (60.1 mg, 73% yield). <sup>1</sup>H NMR (CDCl<sub>3</sub>, 400 MHz)  $\delta$  7.94 (d, *J* = 7.1 Hz, 2H), 7.66 – 7.57 (m, 2H), 7.56 – 7.50 (m, 2H), 7.43 (d, *J* = 8.8 Hz, 2H), 6.89 (d, *J* = 8.8 Hz, 2H), 6.71 (d, *J* = 15.3 Hz, 1H), 3.83 (s, 3H). <sup>13</sup>C{<sup>1</sup>H} NMR (CDCl<sub>3</sub>, 100 MHz)  $\delta$  162.1, 142.3, 141.1, 133.2, 130.4, 129.3, 127.5, 125.0, 124.4, 114.5, 55.5.

**(*E*)-1-Fluoro-4-((4-methoxystyryl)sulfonyl)benzene<sup>25</sup>**

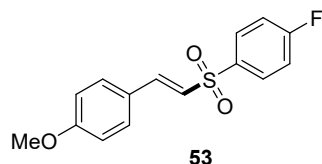

Prepared according to the general procedure using *p*-methoxystyrene **1** (40  $\mu$ L, 0.3 mmol), CuCN (161.2 mg, 1.8 mmol), 4-fluorobenzenesulfonyl chloride (350.3 mg, 1.8 mmol), H<sub>2</sub>O (16  $\mu$ L, 0.9 mmol), and DMF (3.0 mL). The mixture was stirred at room temperature for 24 h and purified by column chromatography (acetone/petroleum ether = 1:20) on silica gel to afford product **53** as a colorless solid (67.6 mg, 77% yield). <sup>1</sup>H NMR (CDCl<sub>3</sub>, 400 MHz)  $\delta$  8.00 – 7.90 (m, 2H), 7.63 (d, *J* = 15.3 Hz, 1H), 7.44 (d, *J* = 8.8 Hz, 2H), 7.25 – 7.17 (m, 2H), 6.90 (d, *J* = 8.8 Hz, 2H), 6.70 (d, *J* = 15.3 Hz, 1H), 3.83 (s, 3H). <sup>13</sup>C {<sup>1</sup>H} NMR (CDCl<sub>3</sub>, 100 MHz)  $\delta$  166.8, 164.2, 162.2, 142.5, 137.2 (d, *J* = 3.0 Hz), 130.6 – 130.2 (m), 124.8, 124.2, 116.7, 116.5, 114.6, 55.5. <sup>19</sup>F NMR (CDCl<sub>3</sub>, 376 MHz)  $\delta$  –104.4.

**(E)-2-((4-Methoxystyryl)sulfonyl)naphthalene**

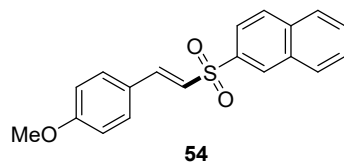

Prepared according to the general procedure using *p*-methoxystyrene **1** (40  $\mu$ L, 0.3 mmol), CuCN (161.2 mg, 1.8 mmol), naphthalene-2-sulfonyl chloride (408.0 mg, 1.8 mmol), H<sub>2</sub>O (16  $\mu$ L, 0.9 mmol), and DMF (3.0 mL). The mixture was stirred at room temperature for 24 h and purified by column chromatography (acetone/petroleum ether = 1:20) on silica gel to afford product **54** as a colorless solid (74.9 mg, 77% yield). <sup>1</sup>H NMR (CDCl<sub>3</sub>, 400 MHz)  $\delta$  8.54 (s, 1H), 7.99 (dd, *J* = 8.6, 6.1 Hz, 2H), 7.94 – 7.85 (m, 2H), 7.71 – 7.60 (m, 3H), 7.44 (d, *J* = 8.8 Hz, 2H), 6.90 (d, *J* = 8.8 Hz, 2H), 6.77 (d, *J* = 15.4 Hz, 1H), 3.83 (s, 3H). <sup>13</sup>C {<sup>1</sup>H} NMR (CDCl<sub>3</sub>, 100 MHz)  $\delta$  162.1, 142.4, 137.9, 135.1, 132.3, 130.4, 129.6, 129.4, 129.1, 129.0, 128.0, 127.6, 125.0, 124.5, 122.6, 114.6, 114.5, 55.5. HR-ESI-MS (*m/z*): calcd. for C<sub>19</sub>H<sub>16</sub>O<sub>3</sub>S [M + H]<sup>+</sup>, 325.0893, found 325.0890.

**(*E*)-2-((4-Methoxystyryl)sulfonyl)thiophene<sup>3</sup>**

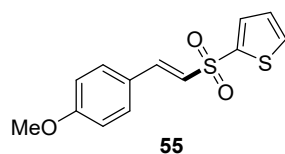

Prepared according to the general procedure using *p*-methoxystyrene **1** (40  $\mu$ L, 0.3 mmol), CuCN (161.2 mg, 1.8 mmol), thiophene-2-sulfonyl chloride (328.8 mg, 1.8 mmol), H<sub>2</sub>O (16  $\mu$ L, 0.9 mmol), and DMF (3.0 mL). The mixture was stirred at room temperature for 24 h and purified by column chromatography (acetone/petroleum ether = 1:20) on silica gel to afford product **55** as a colorless solid (78.3 mg, 93% yield). <sup>1</sup>H NMR (CDCl<sub>3</sub>, 400 MHz)  $\delta$  7.70 (dd,  $J$  = 3.8, 1.4 Hz, 1H), 7.67 (dd,  $J$  = 5.0, 1.4 Hz, 1H), 7.63 (d,  $J$  = 15.3 Hz, 1H), 7.47 – 7.42 (m, 2H), 7.13 (dd,  $J$  = 5.0, 3.8 Hz, 1H), 6.91 (d,  $J$  = 8.8 Hz, 2H), 6.82 (d,  $J$  = 15.3 Hz, 1H), 3.84 (s, 3H). <sup>13</sup>C {<sup>1</sup>H} NMR (CDCl<sub>3</sub>, 100 MHz)  $\delta$  162.2, 142.8, 142.0, 133.6, 133.1, 130.5, 128.0, 125.0, 124.8, 114.6, 55.5.

## 9. Transformations of alkenyl sulfone

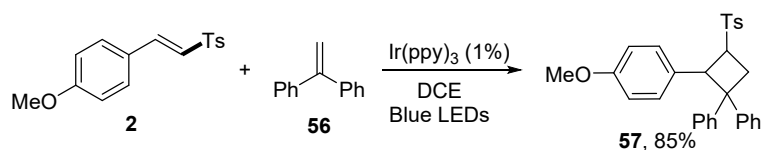

Prepared according to the known procedures.<sup>26</sup> A 10 mL Pyrex tube equipped with a magnetic stir bar was charged with **2** (57.8 mg, 0.2 mmol), 1,1-diphenylethylene **56** (176  $\mu$ L, 1.0 mmol), Ir(ppy)<sub>3</sub> (1.3 mg, 1 mmol%) and 2 mL ClCH<sub>2</sub>CH<sub>2</sub>Cl. This system was bubbled with argon for 10 minutes, then sealed and irradiated at room temperature by blue LED for 5 h. Then, the mixture was evaporated to remove the solvent and the residue was purified by column chromatography (ethyl acetate/hexane = 1:30) on silica gel to afford product **57** as colorless powder (79.7 mg, 85%). <sup>1</sup>H NMR (CDCl<sub>3</sub>, 400 MHz)  $\delta$  7.55 (d,  $J$  = 8.3 Hz, 2H), 7.31 – 7.22 (m, 4H), 7.20 – 7.15 (m, 1H), 7.12 – 7.04 (m, 5H), 6.89 (d,  $J$  = 9.8 Hz, 2H), 6.47 (s, 4H), 4.59 (d,  $J$  = 10.5 Hz, 1H), 4.06 – 3.94 (m, 1H), 3.68 (s, 3H), 3.34 (dd,  $J$  = 11.8, 7.8 Hz, 1H), 2.93 (dd,  $J$  = 11.9, 10.5 Hz, 1H), 2.28 (s, 3H). <sup>13</sup>C {<sup>1</sup>H} NMR (CDCl<sub>3</sub>, 100 MHz)  $\delta$  158.5, 149.6, 144.3, 140.3, 135.4, 129.8, 129.5, 128.7, 128.5, 128.4, 128.2, 127.9, 126.5, 126.3, 126.0, 113.1, 59.0, 55.1, 53.5, 51.2, 31.4, 21.5. HR-ESI-MS ( $m/z$ ): calcd. for C<sub>30</sub>H<sub>29</sub>O<sub>3</sub>S [M + H]<sup>+</sup>, 469.1832, found 469.1834.

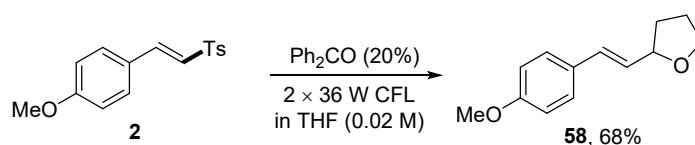

Prepared according to the known procedures.<sup>27</sup> To an oven dried screw cap tube (10 mL) equipped with a magnetic stir bar, charged with **2** (57.8 mg, 0.2 mmol), and benzophenone (7.3 mg, 20 mmol%), followed by tetrahydrofuran (10.0 mL, 0.02 M). The resultant reaction mixture was placed in front of two 36 W household CFL bulb and allowed to stir at room temperature for 80 h. Then, the reaction mixture was neutralized with saturated aqueous solution of NaHCO<sub>3</sub> and diluted with distilled water followed by extracted with ethyl acetate. The combined organic layer was washed with brine, dried over anhydrous Na<sub>2</sub>SO<sub>4</sub>, and concentrated under reduced pressure. The



crude material was purified by column chromatography (acetone/petroleum ether = 1:50) on silica gel to afford product **58** as a colorless oil (27.3 mg, 68%).<sup>28</sup> <sup>1</sup>H NMR (CDCl<sub>3</sub>, 400 MHz)  $\delta$  7.31 (d,  $J$  = 8.8 Hz, 2H), 6.84 (d,  $J$  = 8.8 Hz, 2H), 6.53 (d,  $J$  = 15.8, 1H), 6.07 (dd,  $J$  = 15.8, 6.8 Hz, 1H), 4.49 – 4.39 (m, 1H), 4.02 – 3.91 (m, 1H), 3.88 – 3.78 (m, 4H), 3.80 (s, 3H), 2.17 – 2.05 (m, 1H), 2.04 – 1.88 (m, 2H), 1.77 – 1.62 (m, 1H).

## 10. Copies of NMR spectra

$^1\text{H}$  NMR ( $\text{CDCl}_3$ , 600 MHz) of **2**

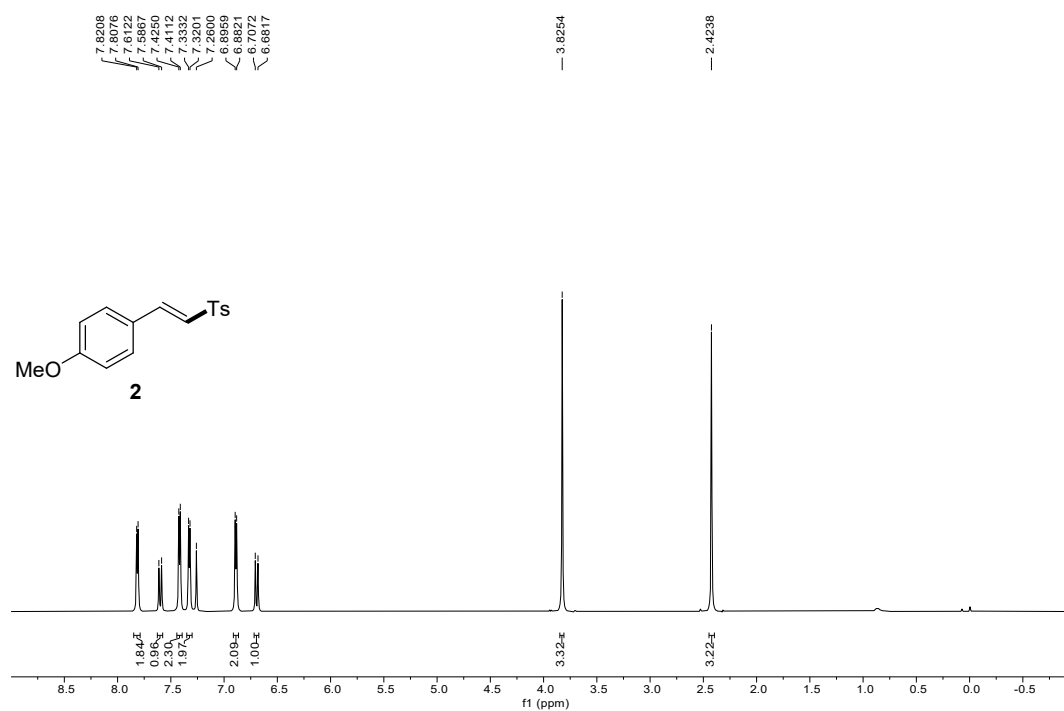

$^{13}\text{C}\{^1\text{H}\}$  NMR ( $\text{CDCl}_3$ , 150 MHz) of **2**

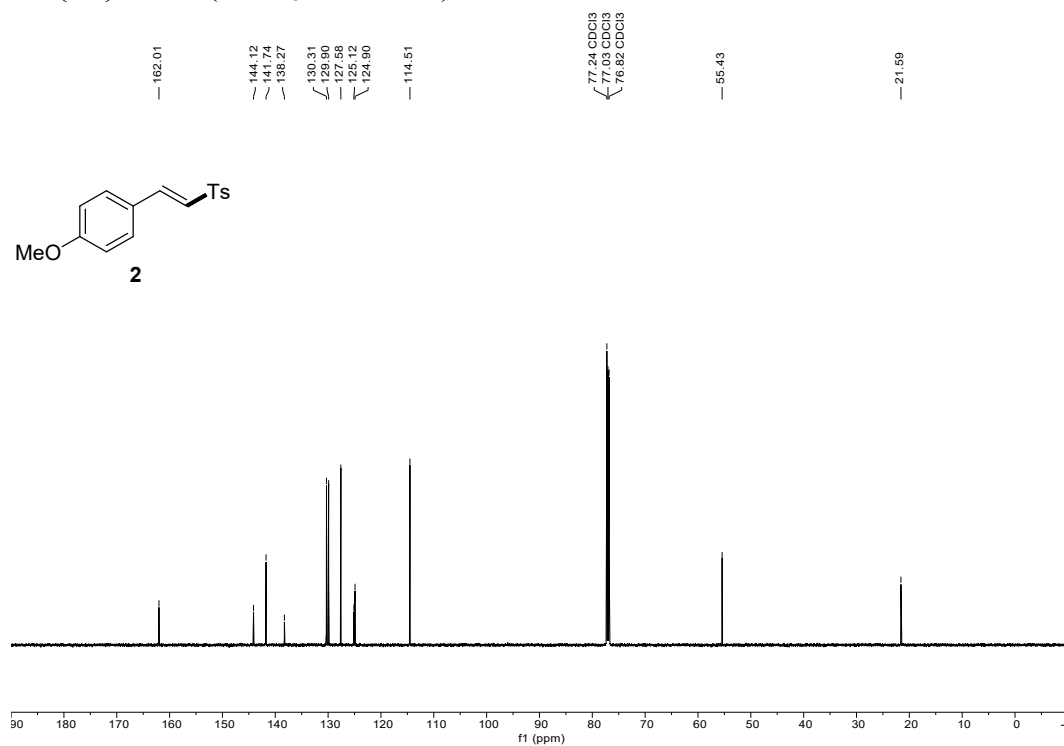

$^1\text{H}$  NMR ( $\text{CDCl}_3$ ,  $\text{CDCl}_3$ ) of **7**

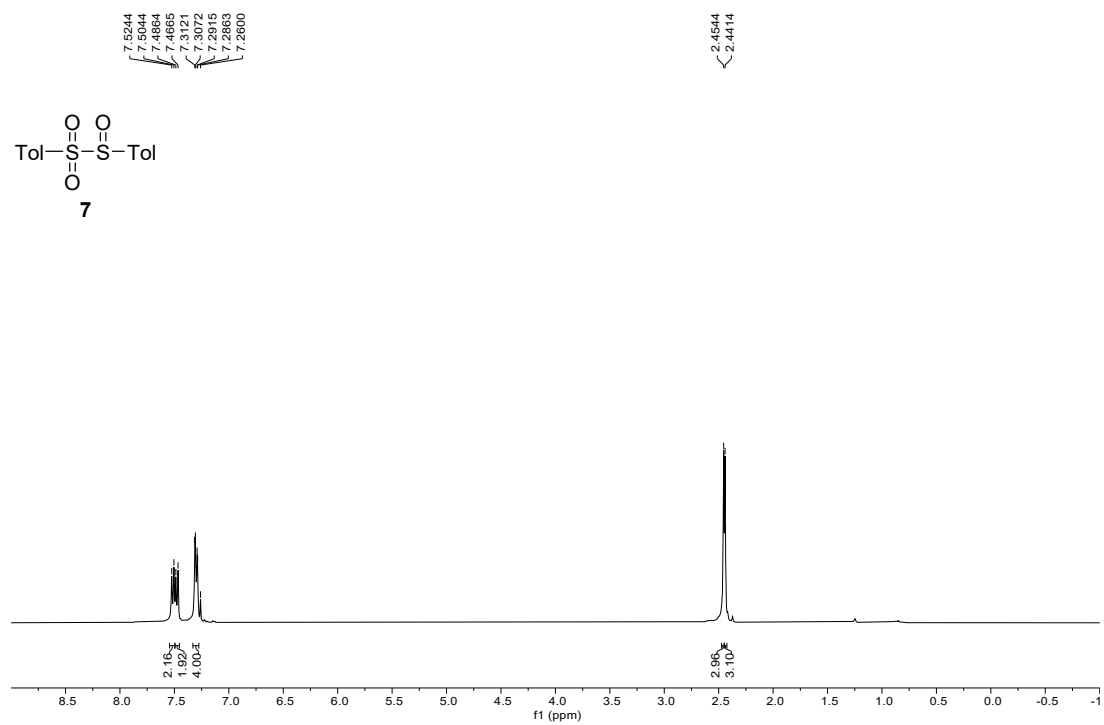

$^{13}\text{C}\{^1\text{H}\}$  NMR ( $\text{CDCl}_3$ ,  $\text{CDCl}_3$ ) of **7**

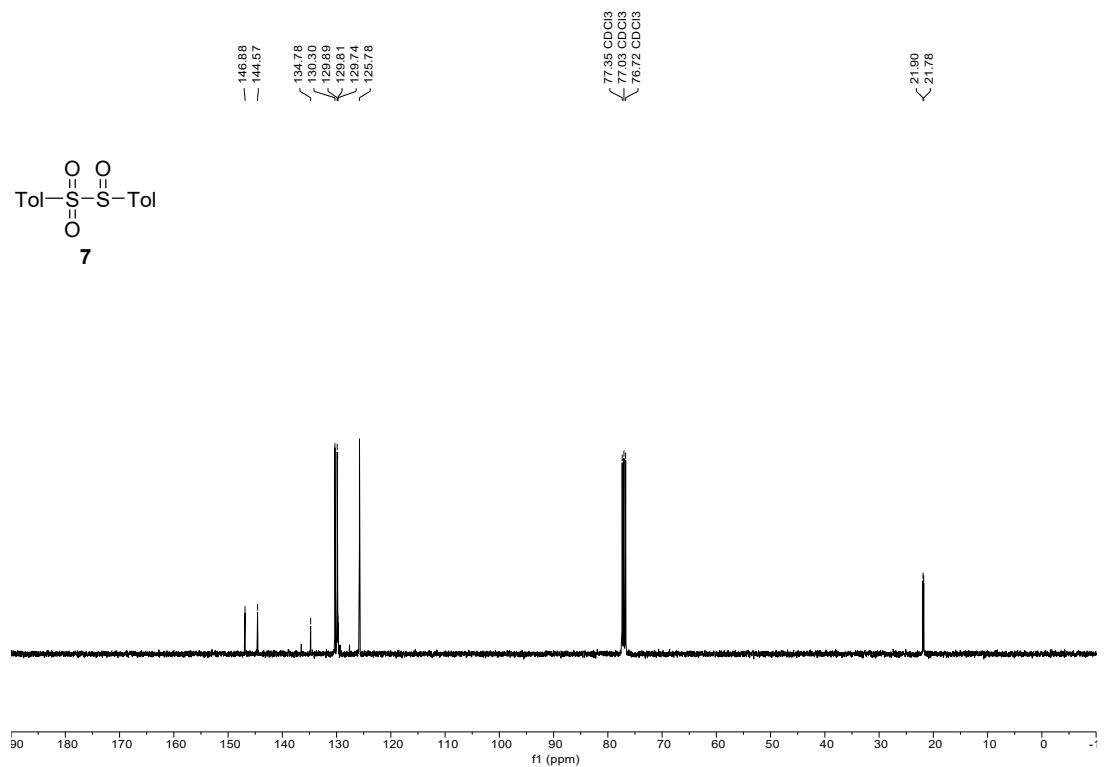

$^1\text{H}$  NMR ( $\text{CDCl}_3$ , 400 MHz) of **9**

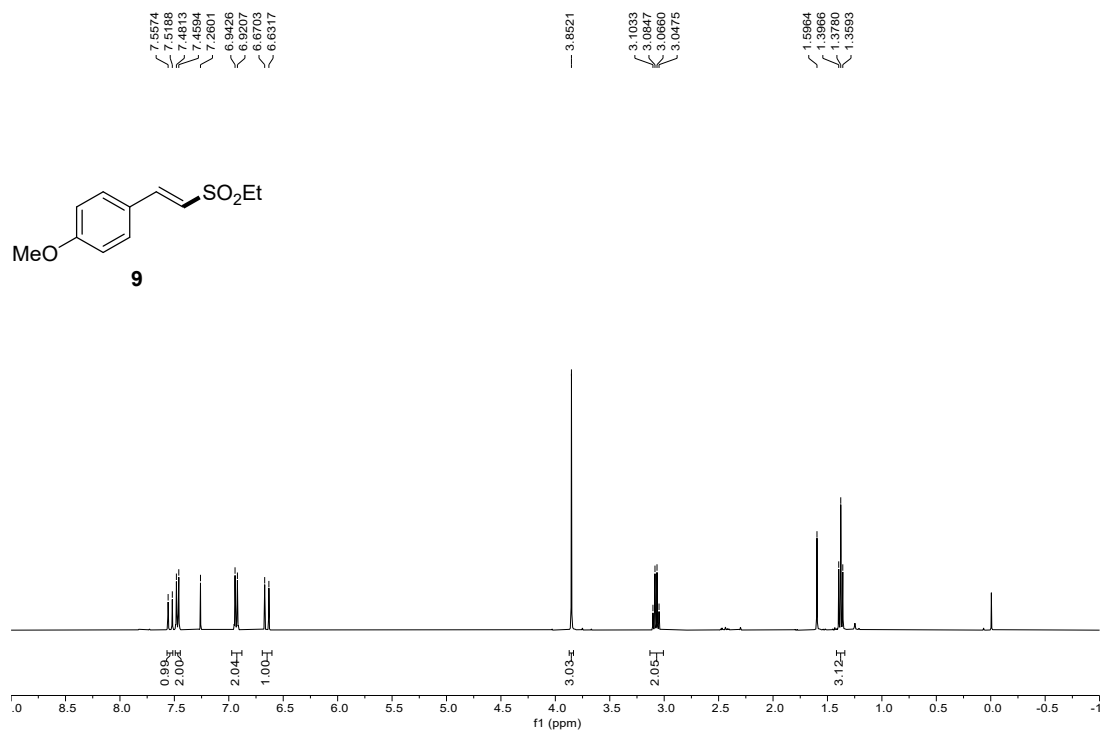

$^{13}\text{C}\{^1\text{H}\}$  NMR ( $\text{CDCl}_3$ , 100 MHz) of **9**

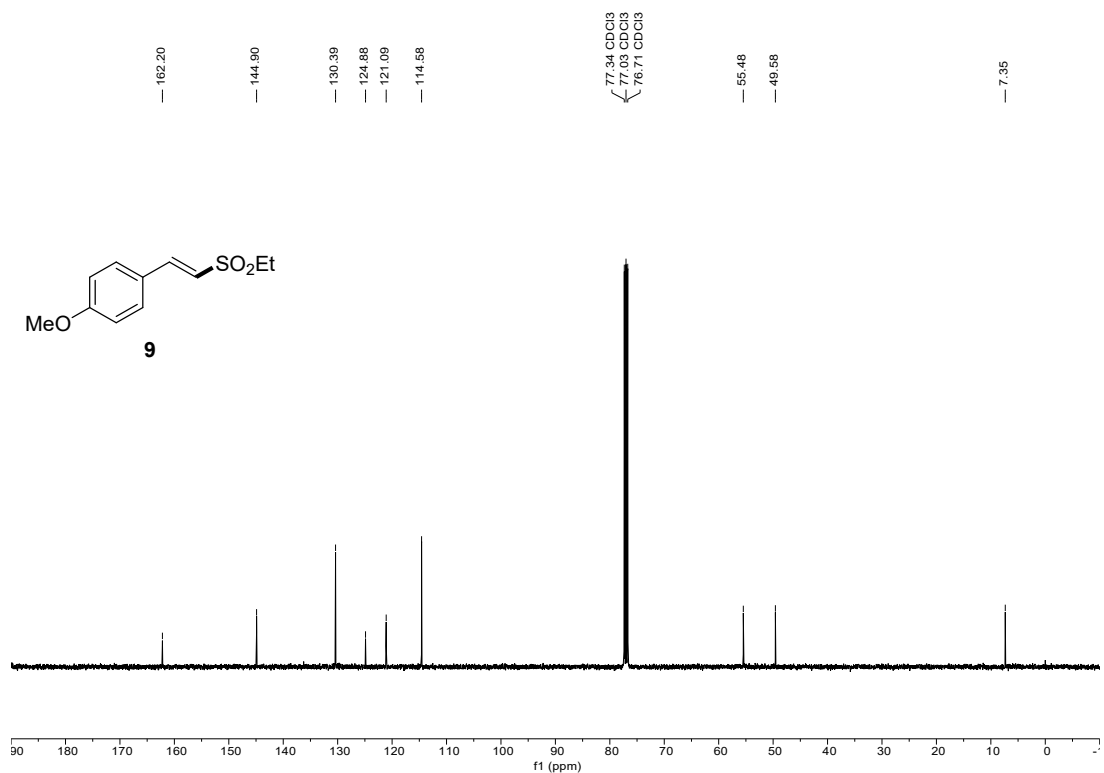

$^1\text{H}$  NMR ( $\text{CDCl}_3$ , 400 MHz) of **10**

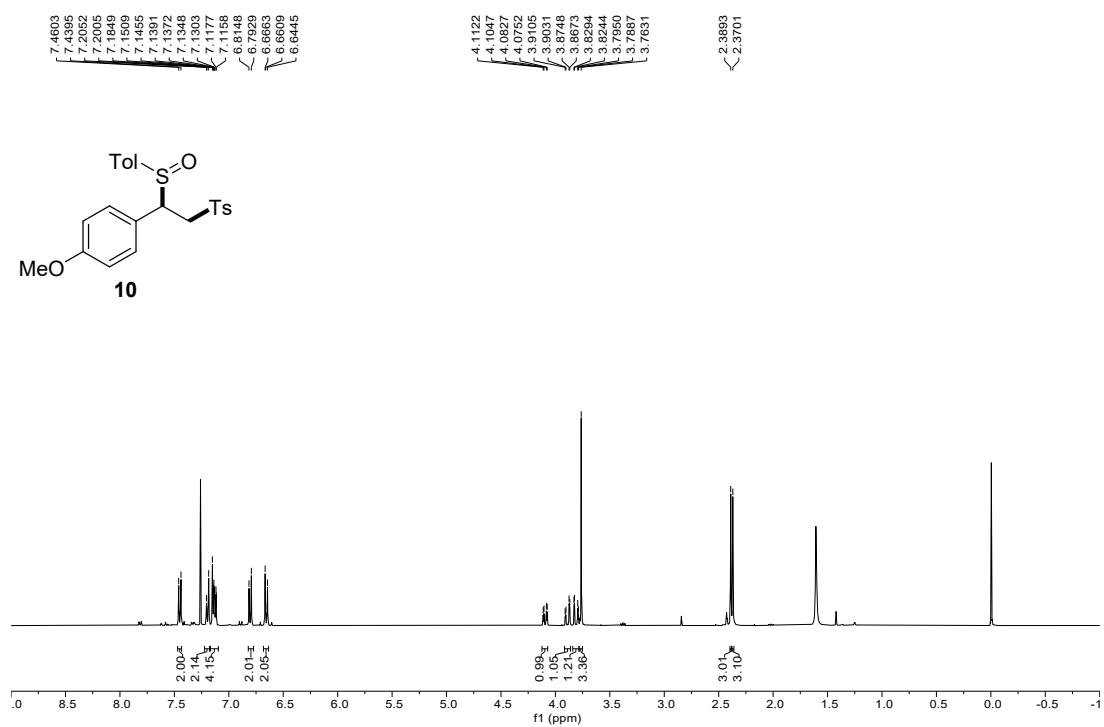

$^{13}\text{C}\{^1\text{H}\}$  NMR ( $\text{CDCl}_3$ , 100 MHz) of **10**

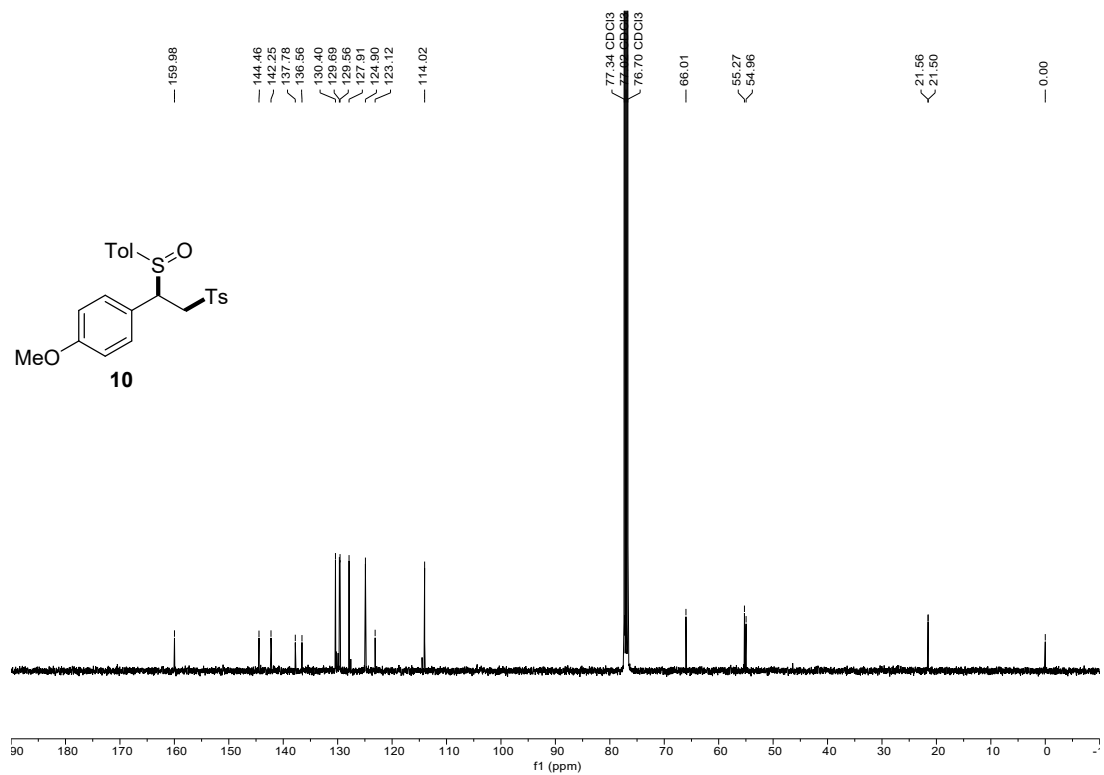

<sup>1</sup>H NMR (CDCl<sub>3</sub>, 400 MHz) of **11**

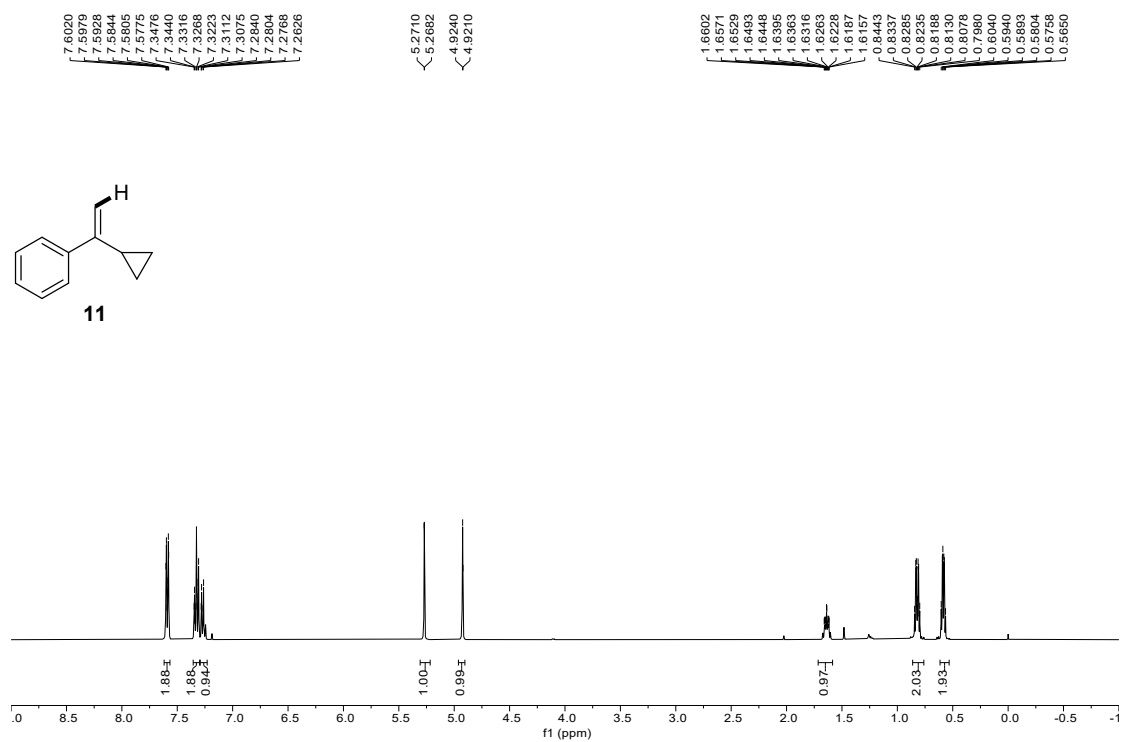

$^1\text{H}$  NMR ( $\text{CDCl}_3$ , 500 MHz) of **12**

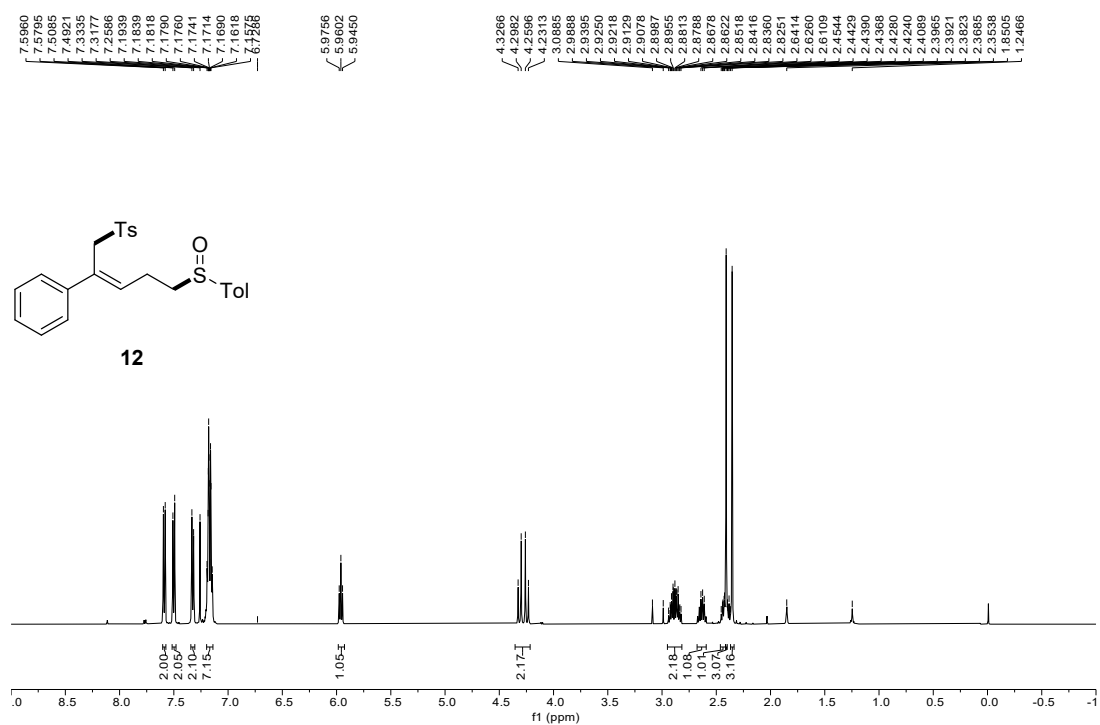

$^{13}\text{C}\{^1\text{H}\}$  NMR ( $\text{CDCl}_3$ , 125 MHz) of **12**

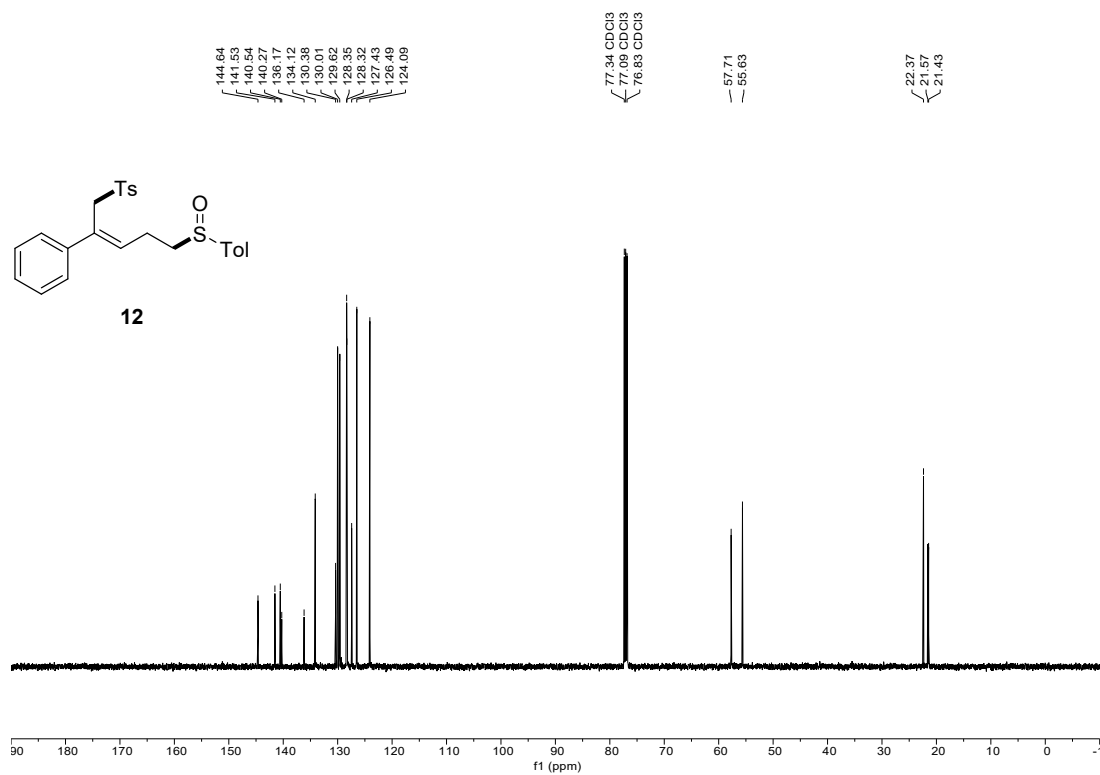

$^1\text{H}$  NMR ( $\text{CDCl}_3$ , 400 MHz) of **14**

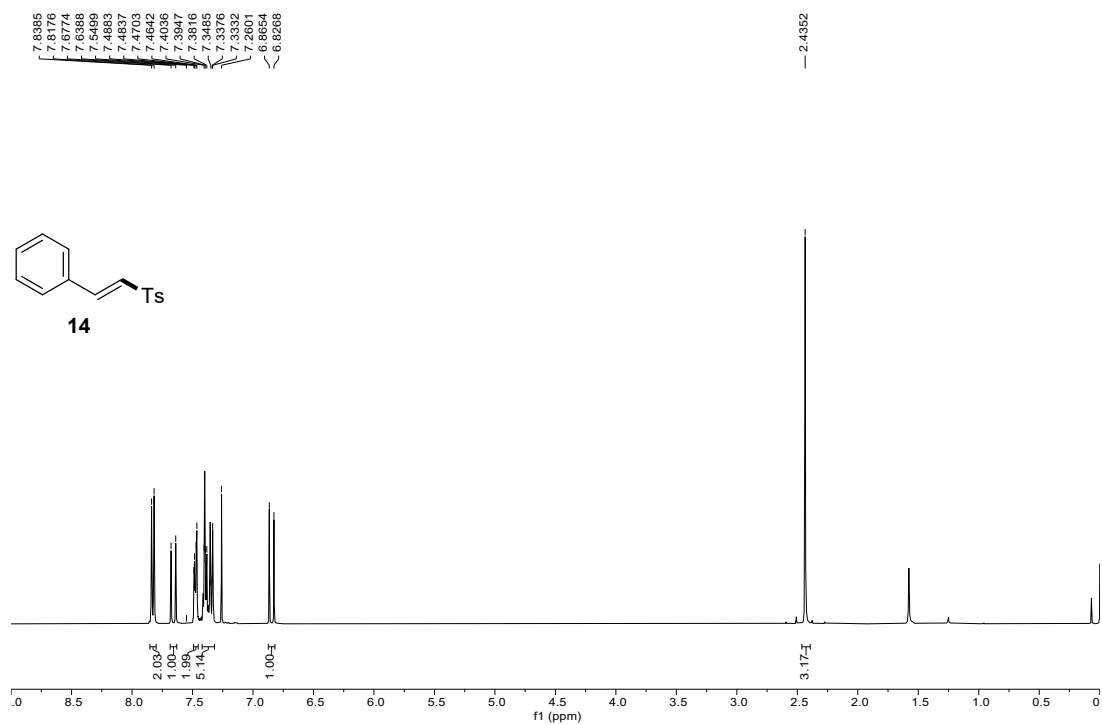

$^{13}\text{C}$  { $^1\text{H}$ } NMR ( $\text{CDCl}_3$ , 100 MHz) of **14**

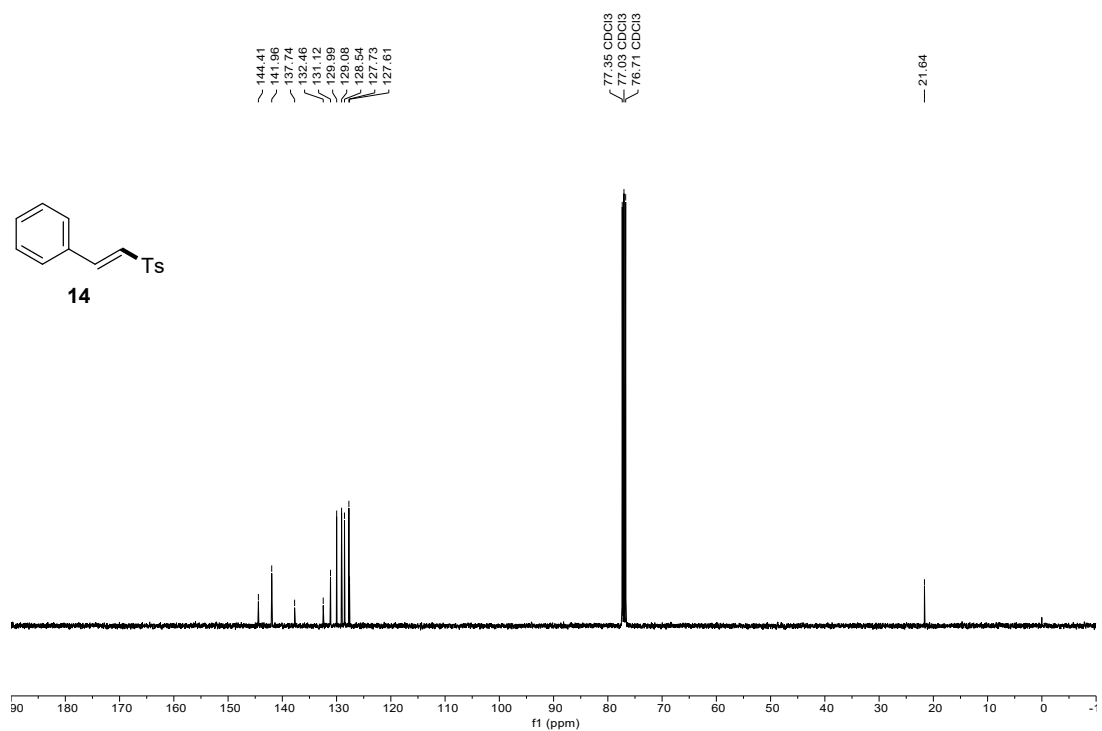



$^1\text{H}$  NMR ( $\text{CDCl}_3$ , 600 MHz) of **15**

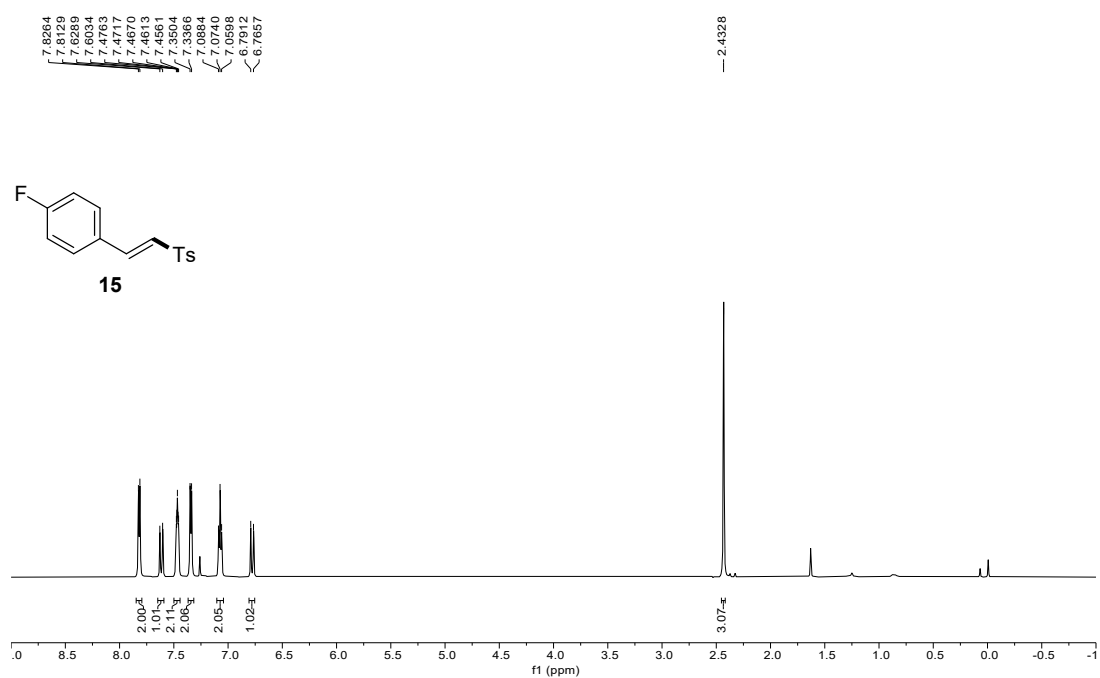

$^{13}\text{C}\{^1\text{H}\}$  NMR ( $\text{CDCl}_3$ , 150 MHz) of **15**

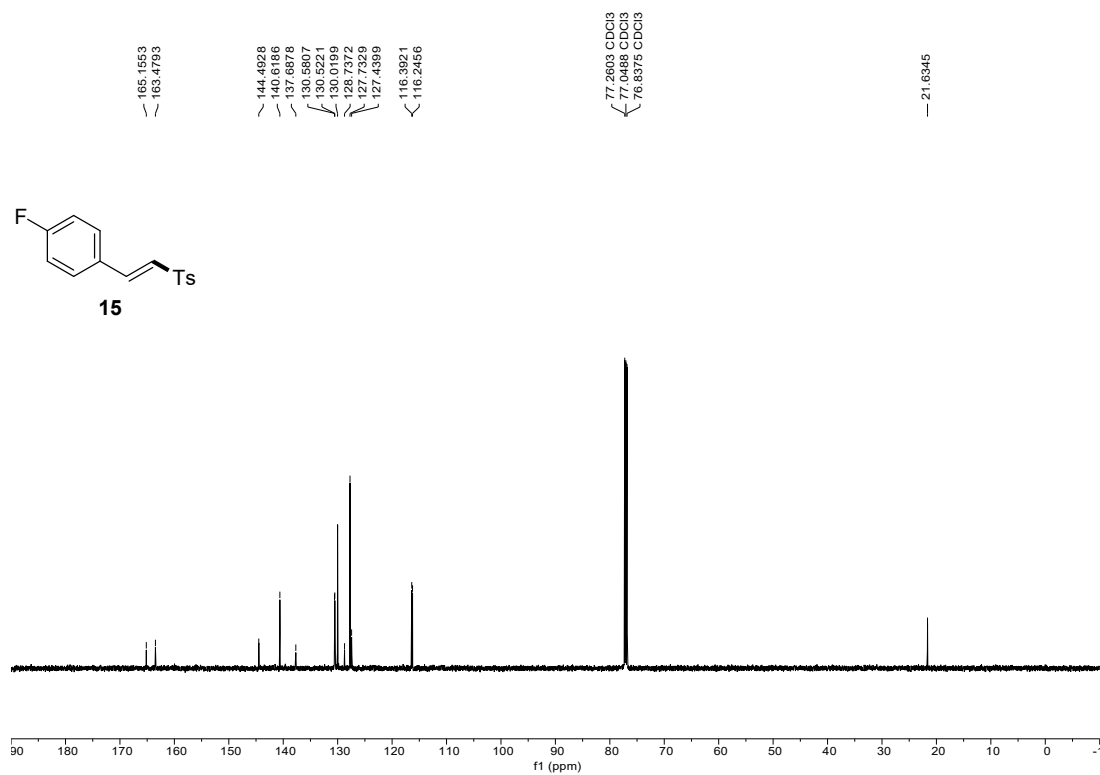

$^{19}\text{F}$  NMR (565 MHz,  $\text{CDCl}_3$ ) of **15**

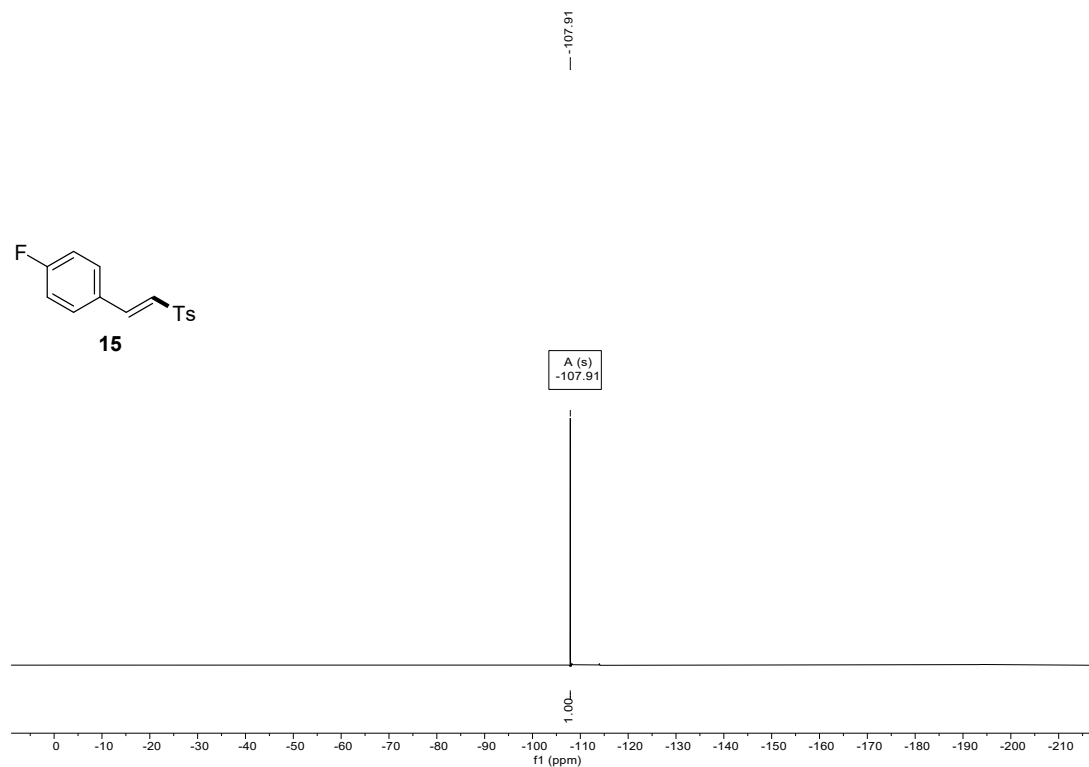

$^1\text{H}$  NMR ( $\text{CDCl}_3$ , 500 MHz) of **16**

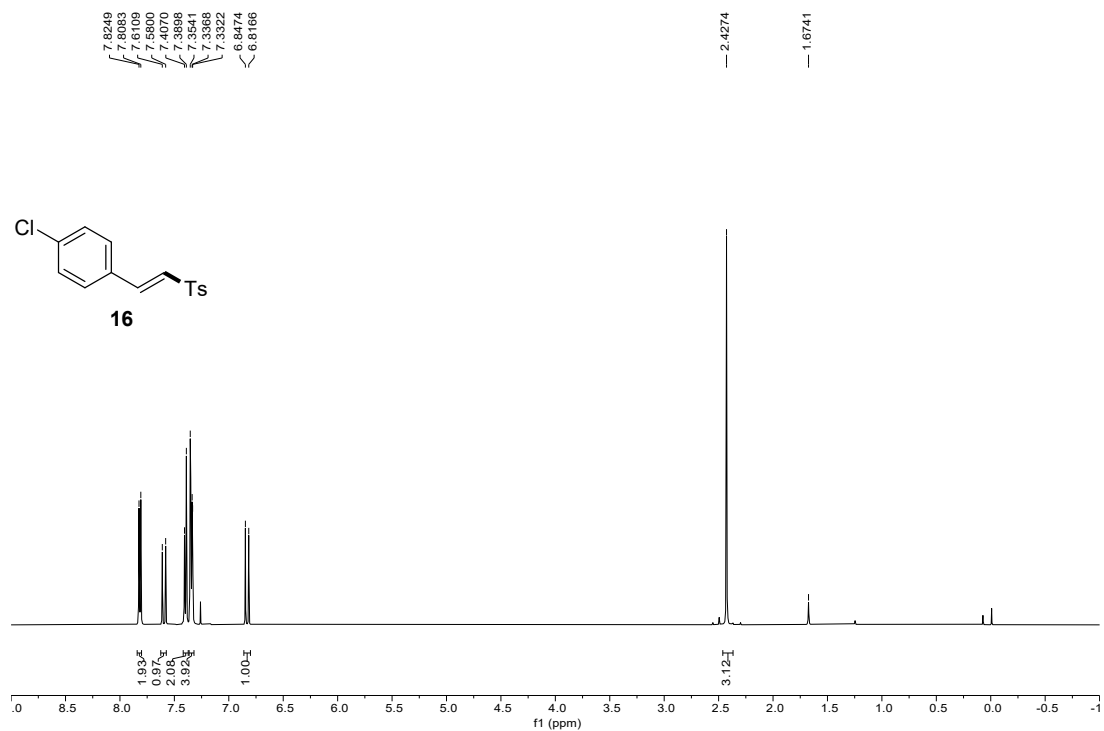

$^{13}\text{C}\{^1\text{H}\}$  NMR ( $\text{CDCl}_3$ , 125 MHz) of **16**

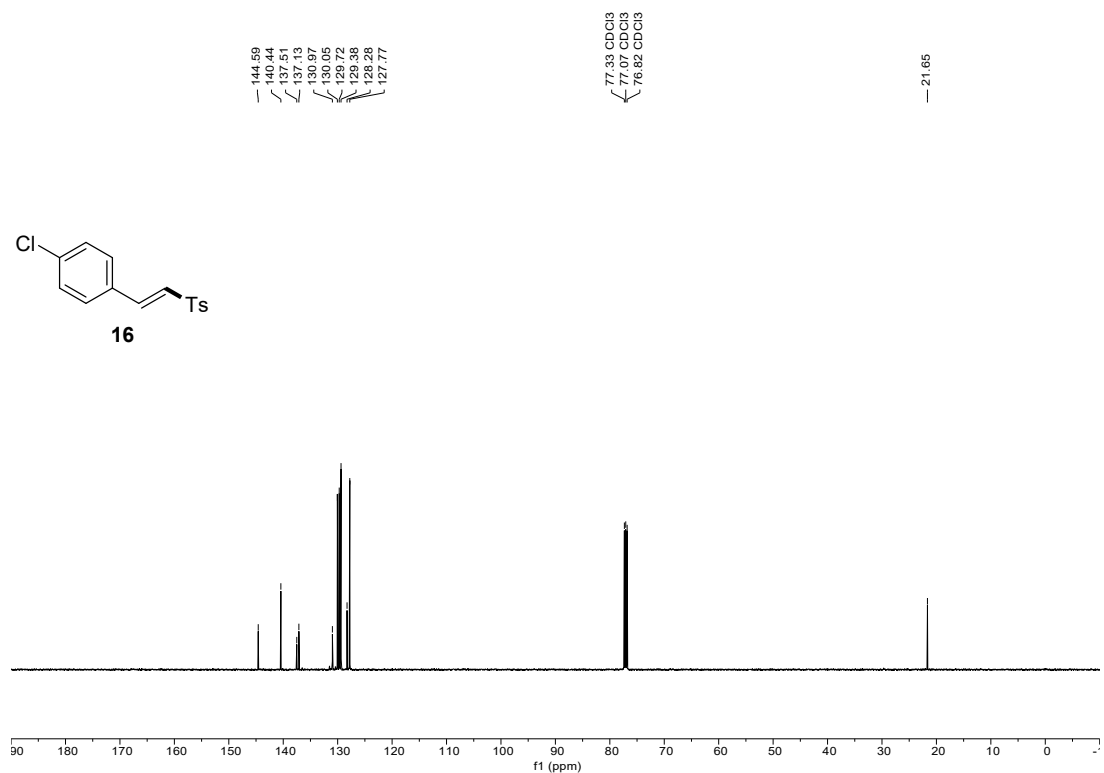

$^1\text{H}$  NMR ( $\text{CDCl}_3$ , 400 MHz) of **17**

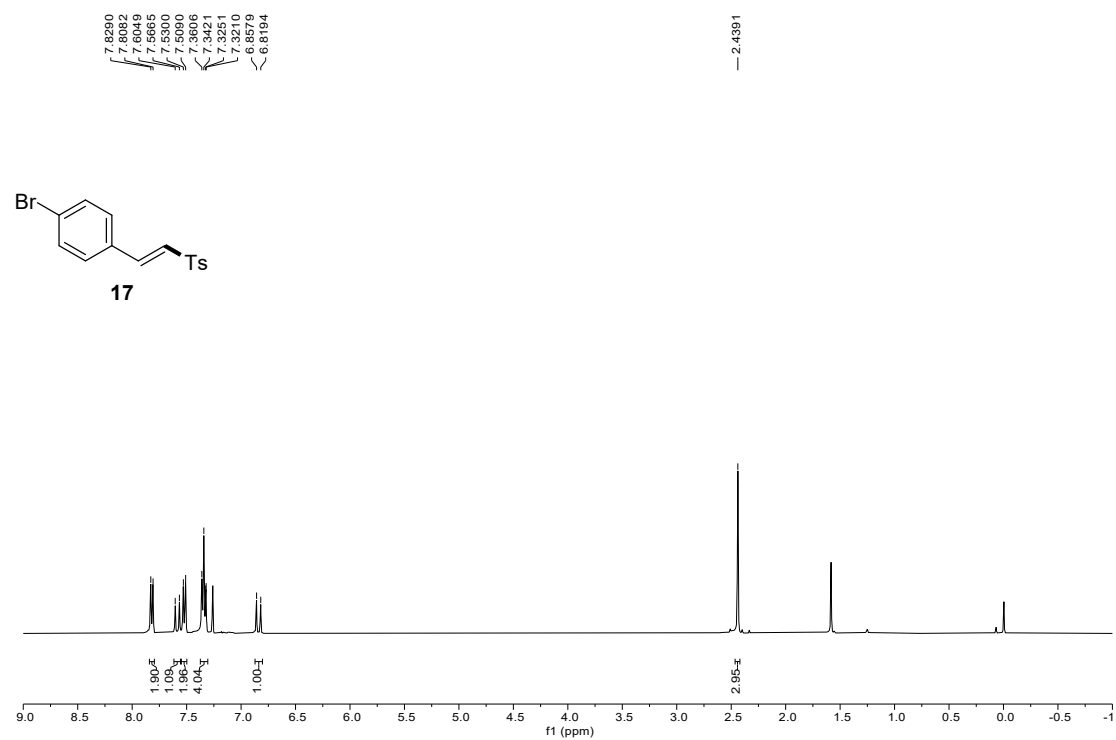

$^{13}\text{C}\{^1\text{H}\}$  NMR ( $\text{CDCl}_3$ , 100 MHz) of **17**

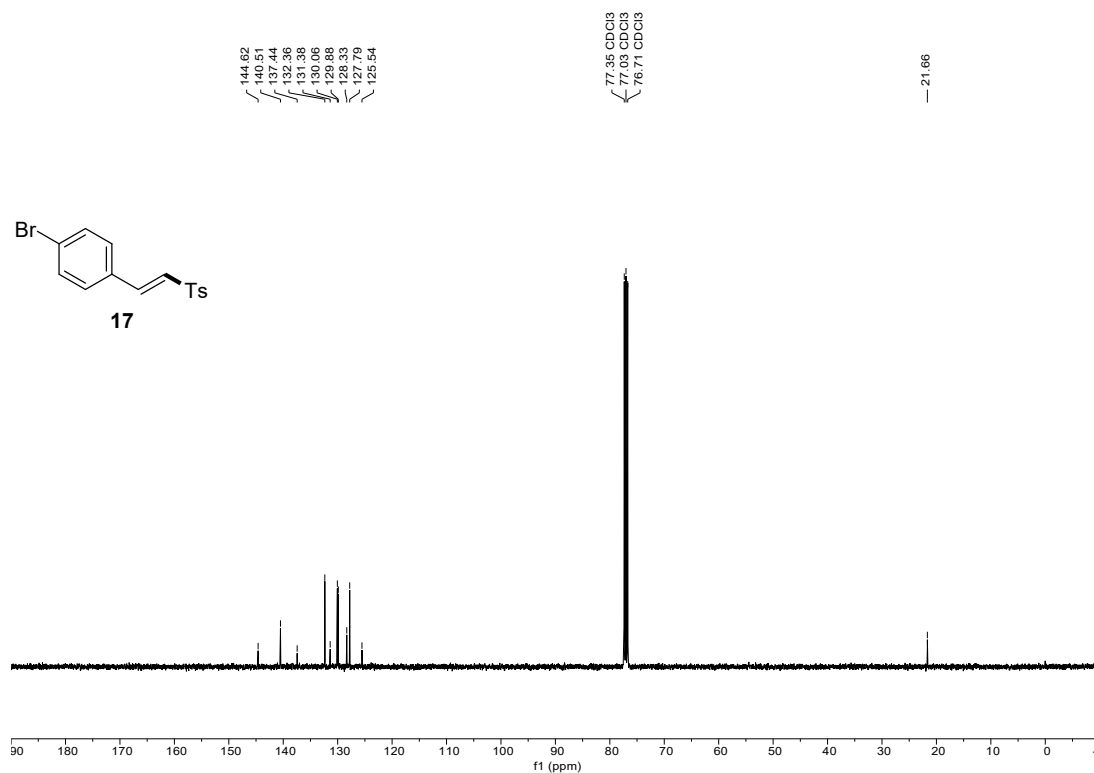

$^1\text{H}$  NMR ( $\text{CDCl}_3$ , 600 MHz) of **18**

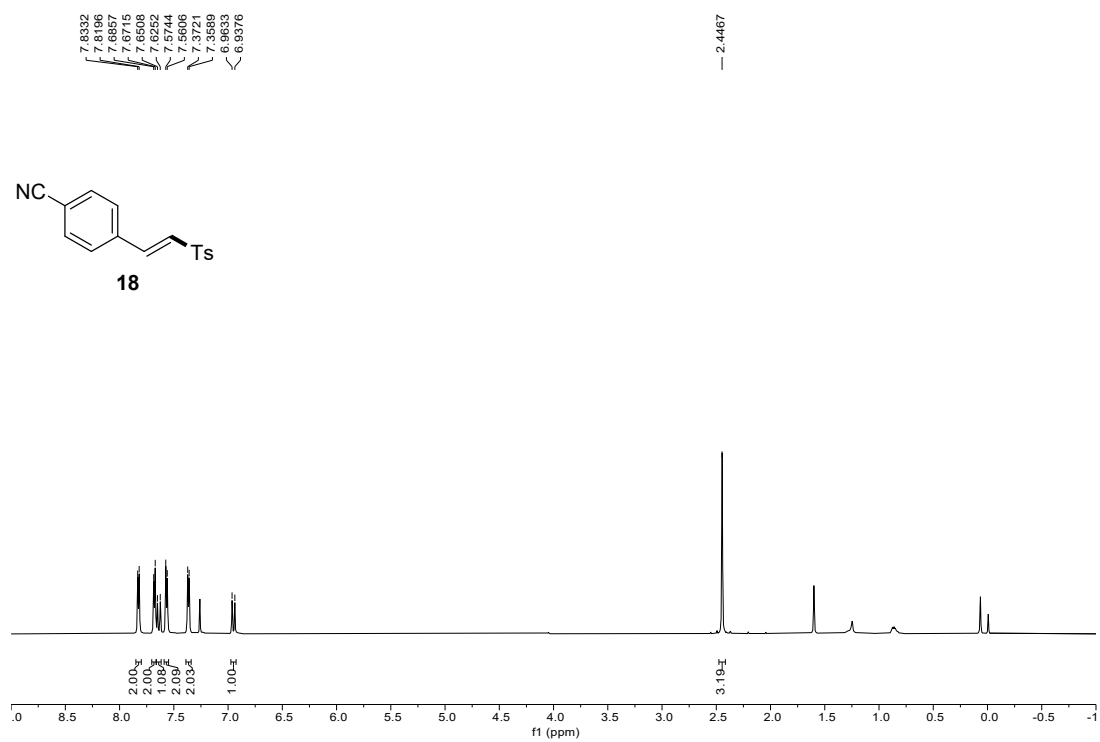

$^{13}\text{C}\{^1\text{H}\}$  NMR ( $\text{CDCl}_3$ , 150 MHz) of **18**

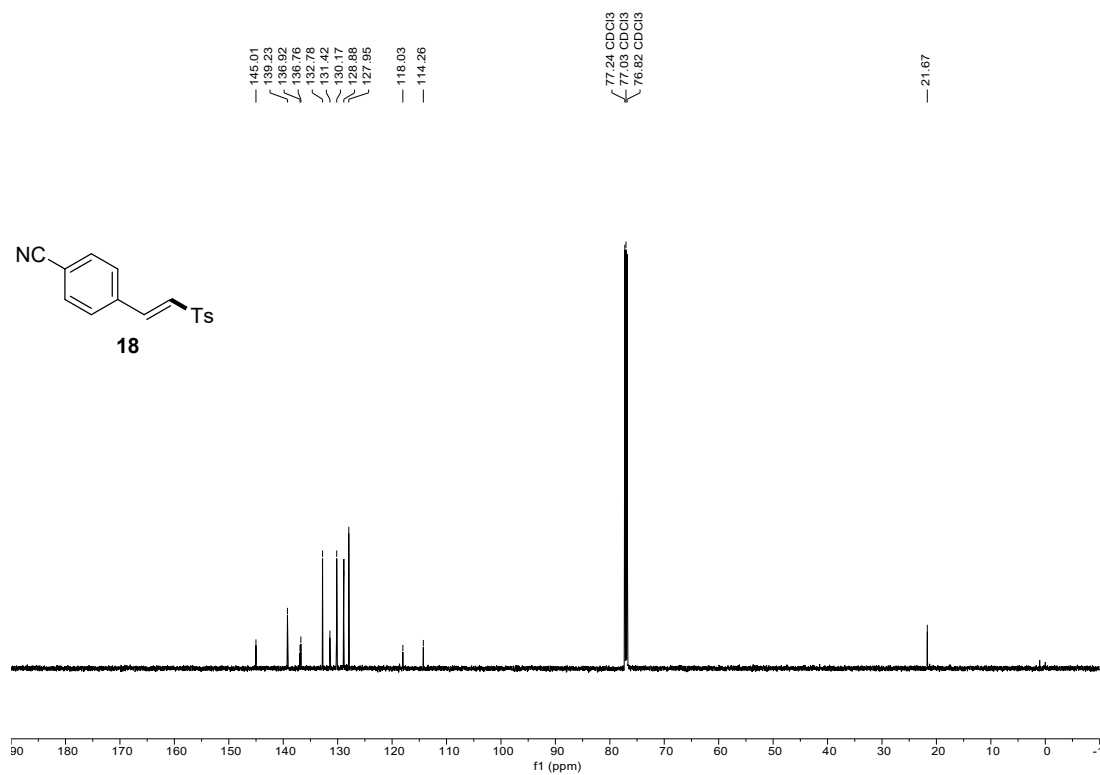

$^1\text{H}$  NMR ( $\text{CDCl}_3$ , 500 MHz) of **19**

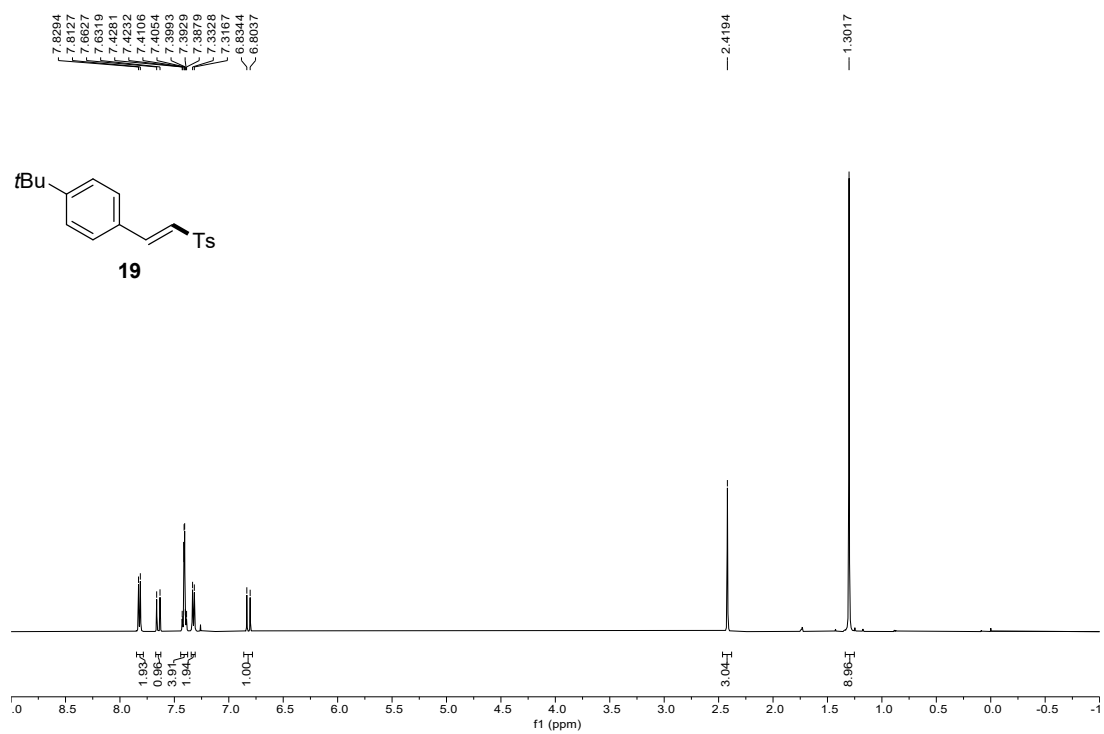

$^{13}\text{C}\{^1\text{H}\}$  NMR ( $\text{CDCl}_3$ , 125 MHz) of **19**

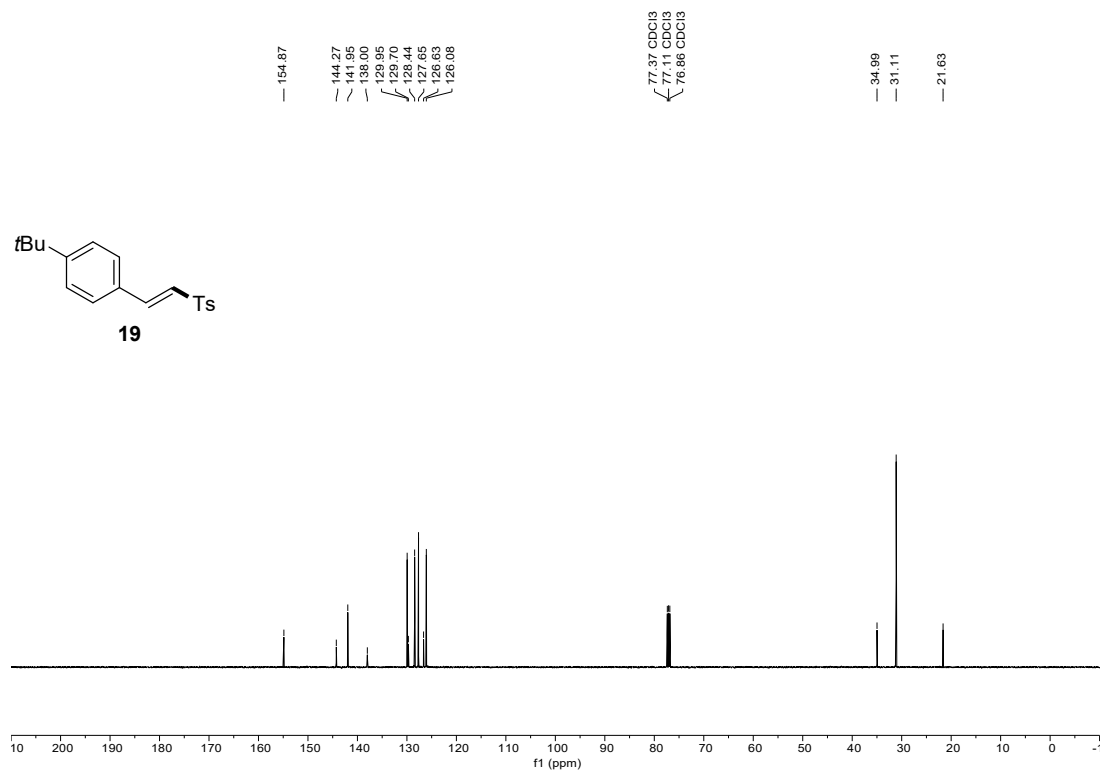

$^1\text{H}$  NMR ( $\text{CDCl}_3$ , 500 MHz) of **20**

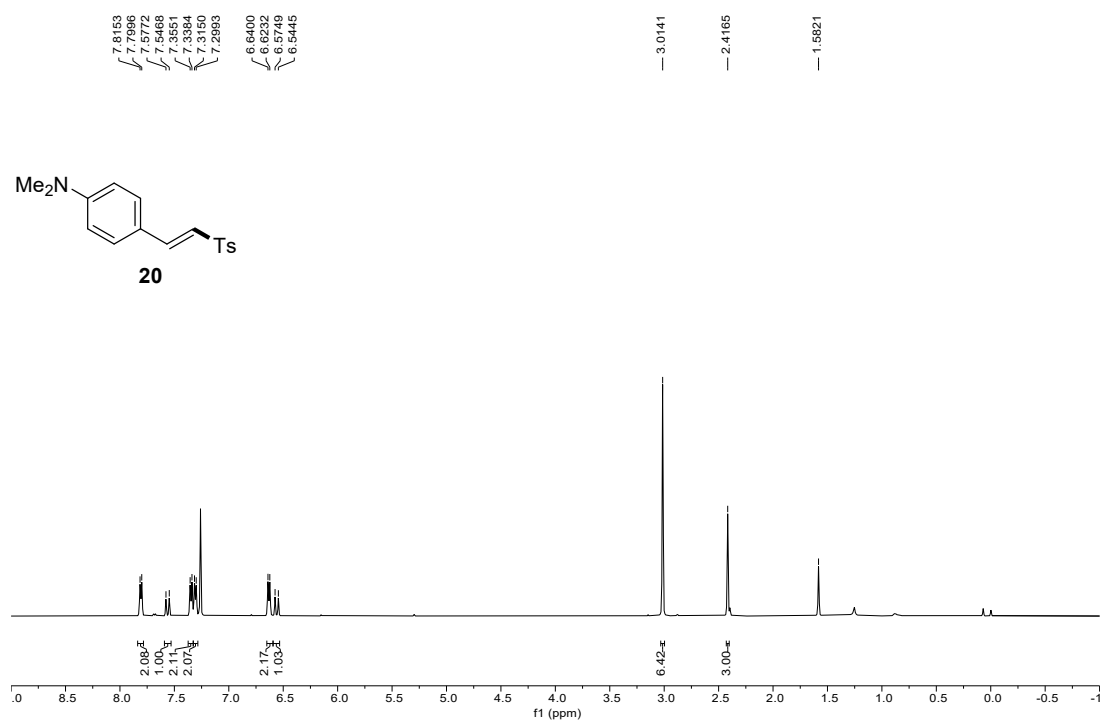

$^{13}\text{C}\{^1\text{H}\}$  NMR ( $\text{CDCl}_3$ , 125 MHz) of **20**

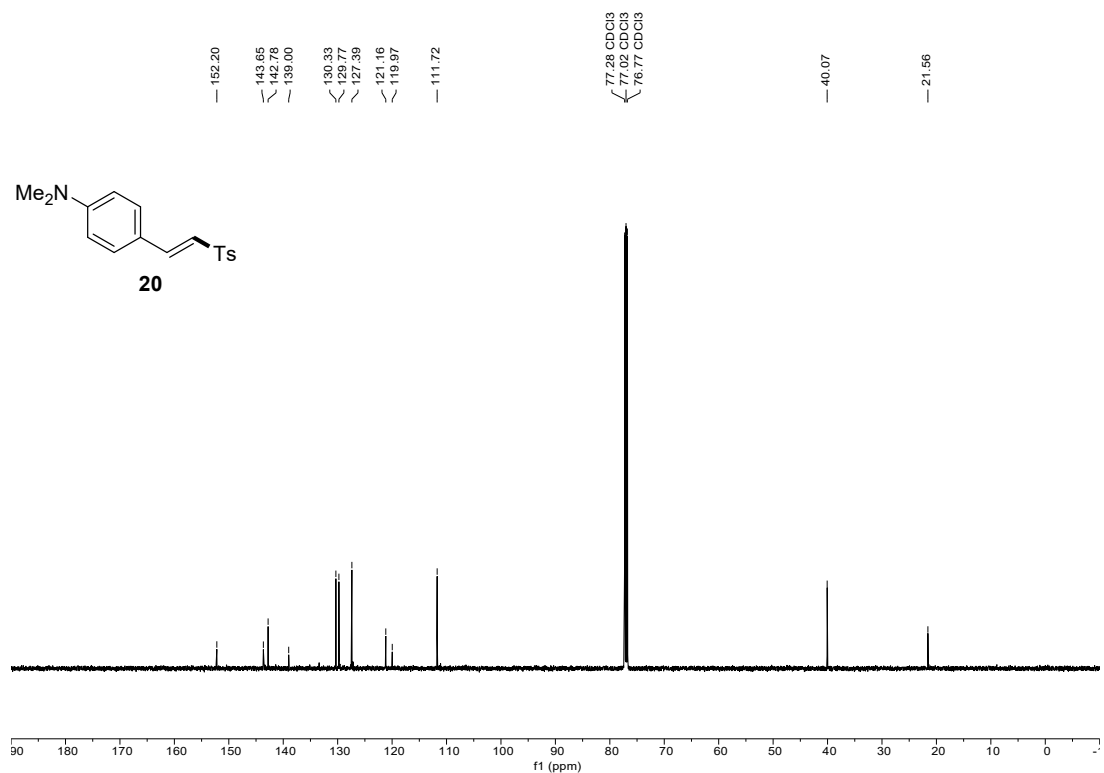

$^1\text{H}$  NMR ( $\text{CDCl}_3$ , 500 MHz) of **21**

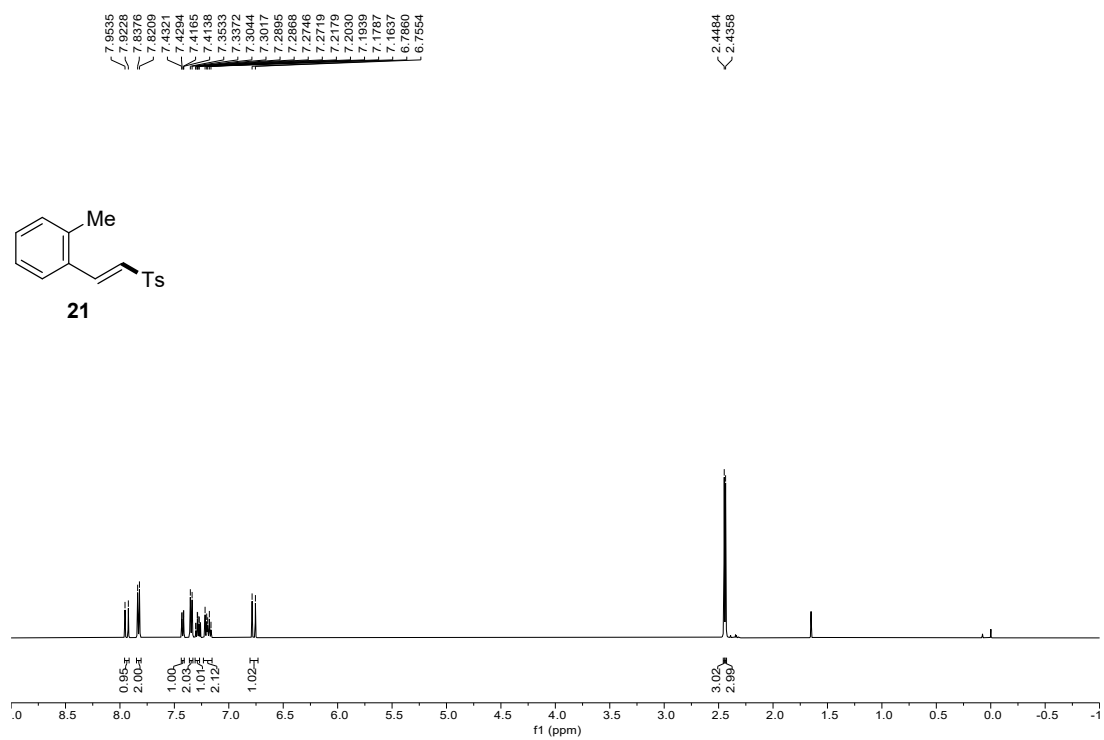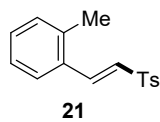

$^{13}\text{C}\{^1\text{H}\}$  NMR ( $\text{CDCl}_3$ , 125MHz) of **21**

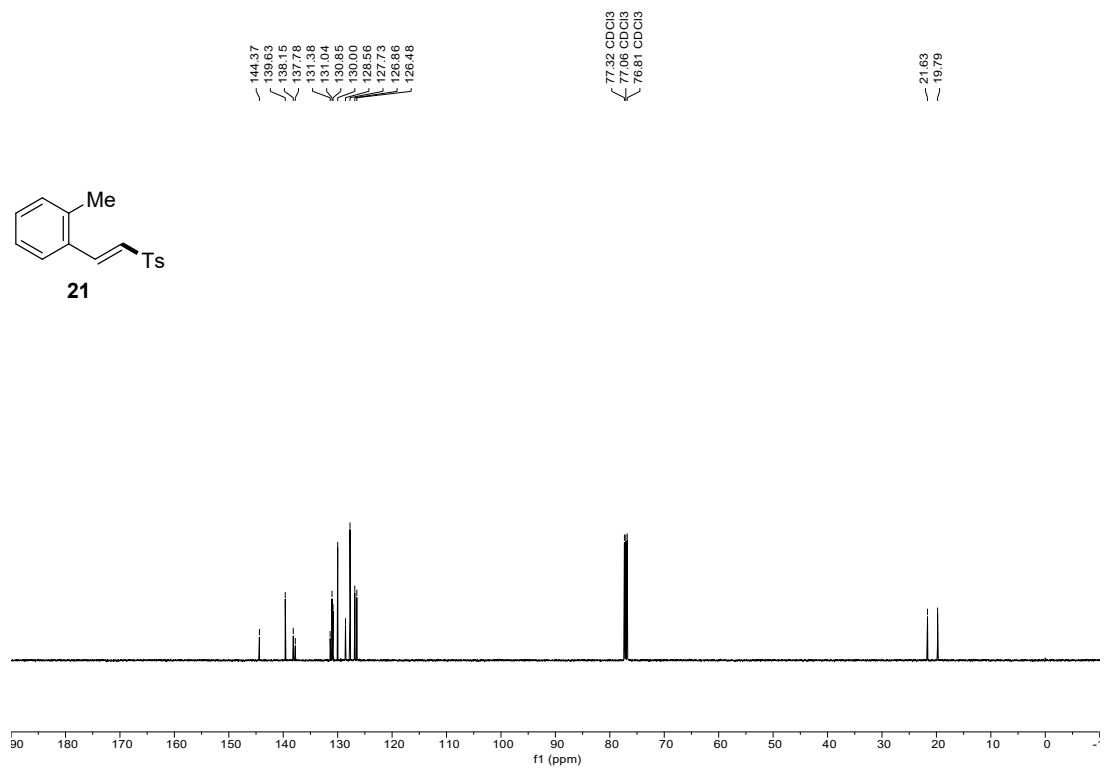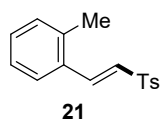



$^1\text{H}$  NMR ( $\text{CDCl}_3$ , 500 MHz) of **22**

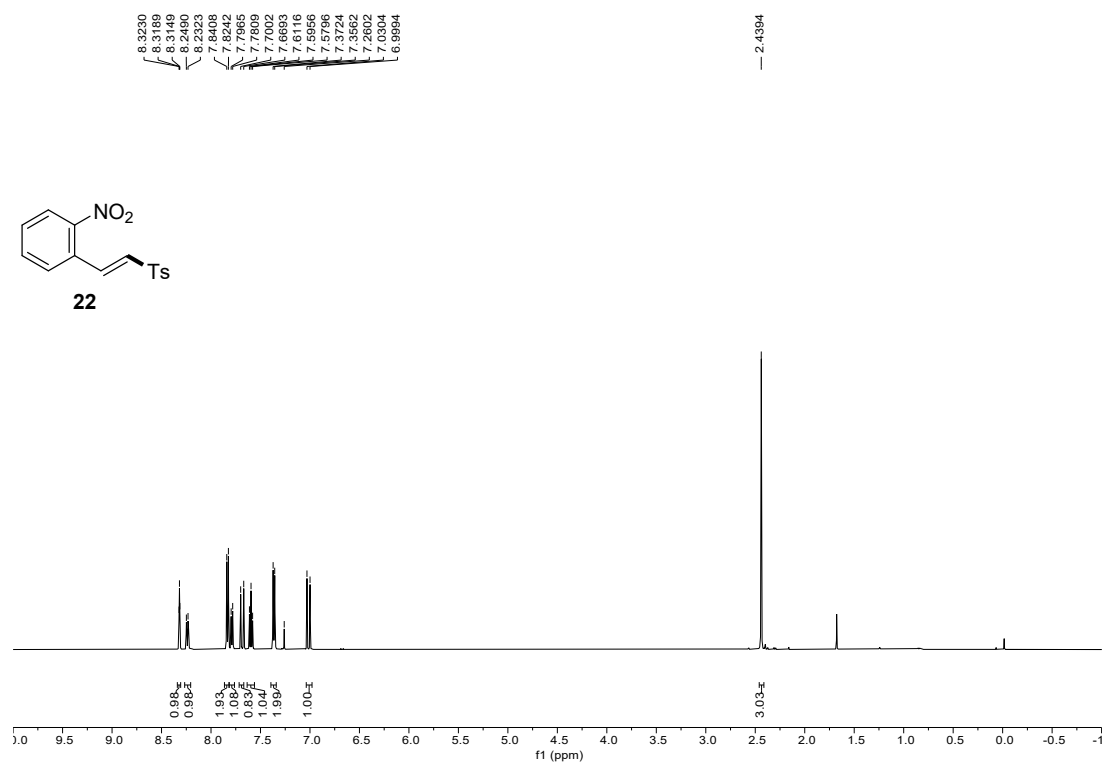

$^{13}\text{C}\{^1\text{H}\}$  NMR ( $\text{CDCl}_3$ , 125 MHz) of **22**

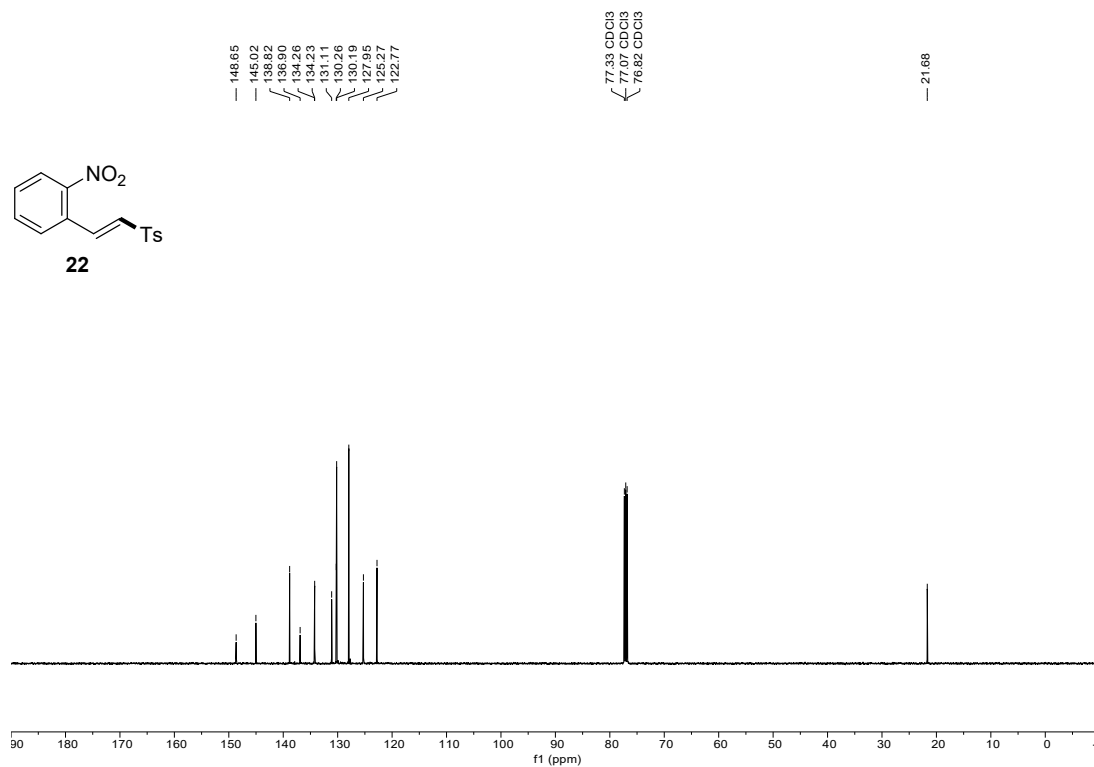

$^1\text{H}$  NMR ( $\text{CDCl}_3$ , 500 MHz) of **23**

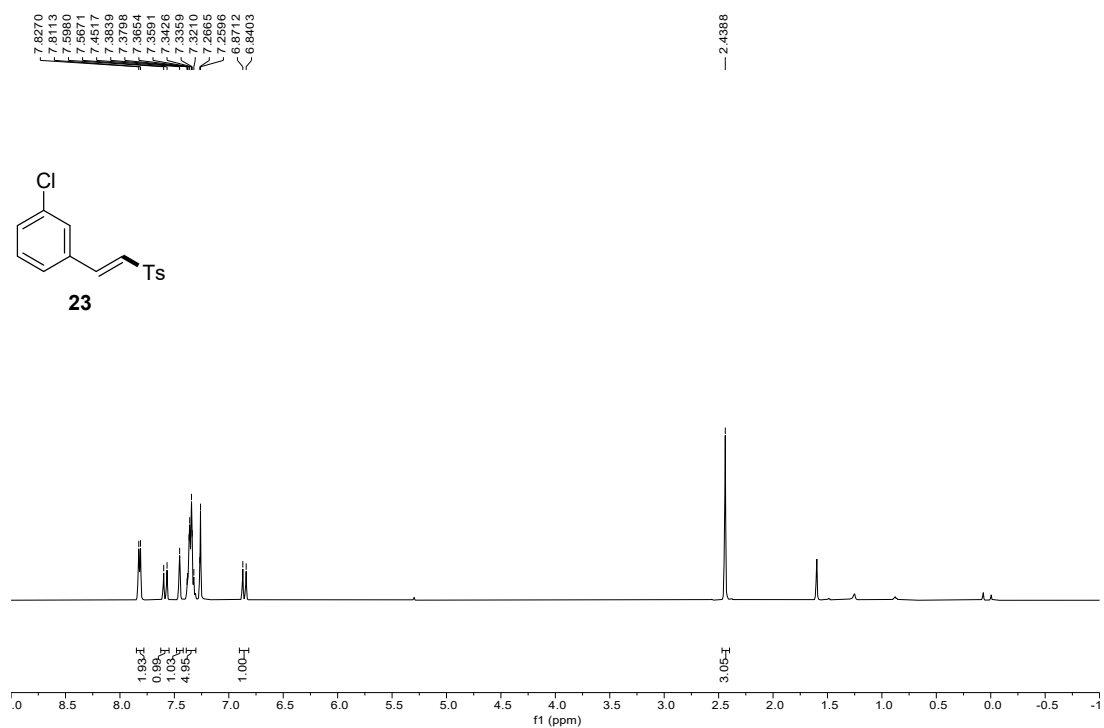

$^{13}\text{C}\{^1\text{H}\}$  NMR ( $\text{CDCl}_3$ , 125 MHz) of **23**

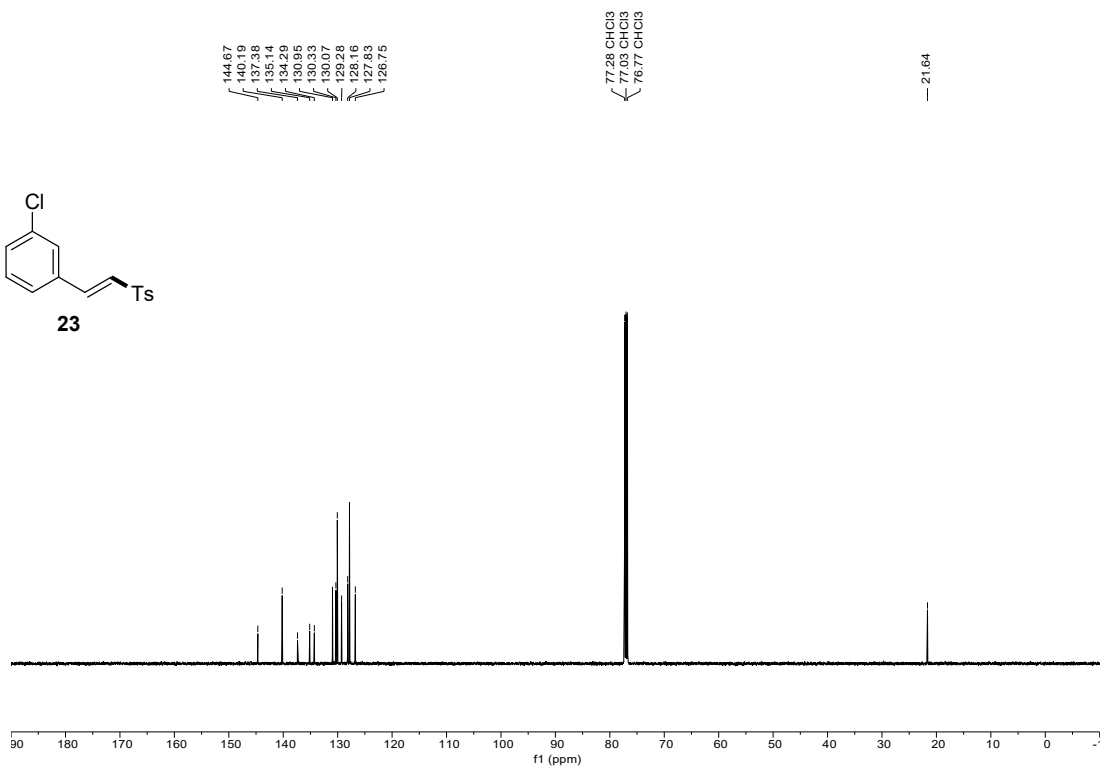

$^1\text{H}$  NMR ( $\text{CDCl}_3$ , 400 MHz) of **24**

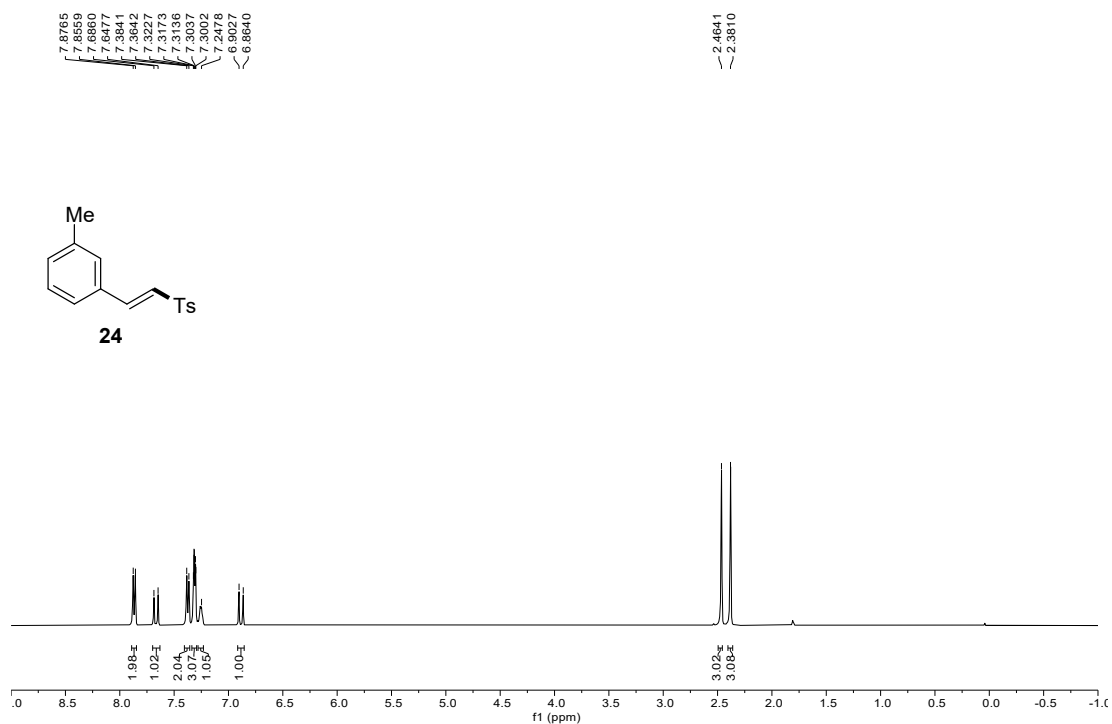

$^{13}\text{C}\{^1\text{H}\}$  NMR ( $\text{CDCl}_3$ , 100 MHz) of **24**

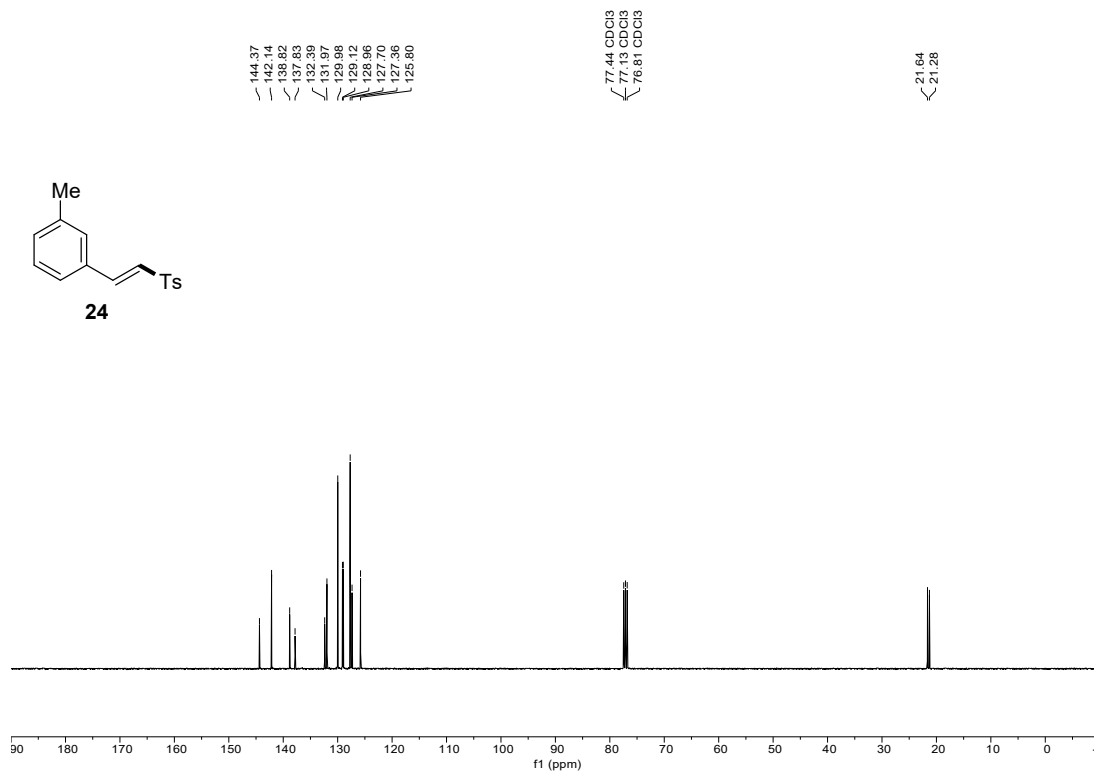

$^1\text{H}$  NMR ( $\text{CDCl}_3$ , 400 MHz) of **25**

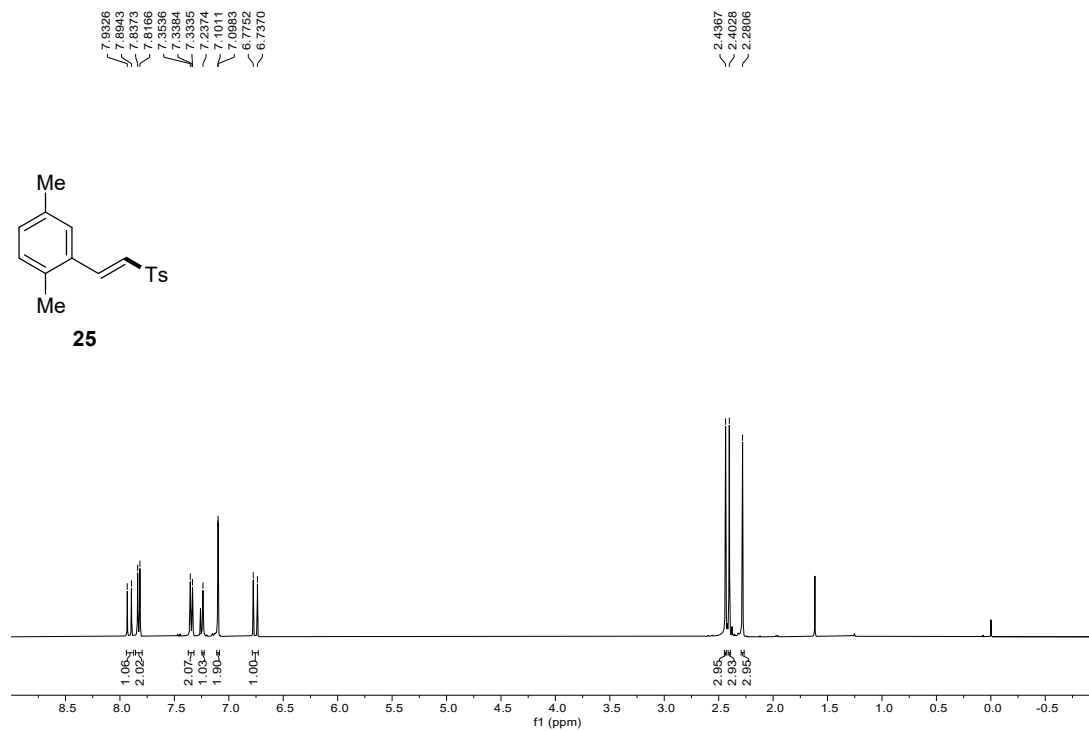

$^{13}\text{C}\{^1\text{H}\}$  NMR ( $\text{CDCl}_3$ , 100 MHz) of **25**

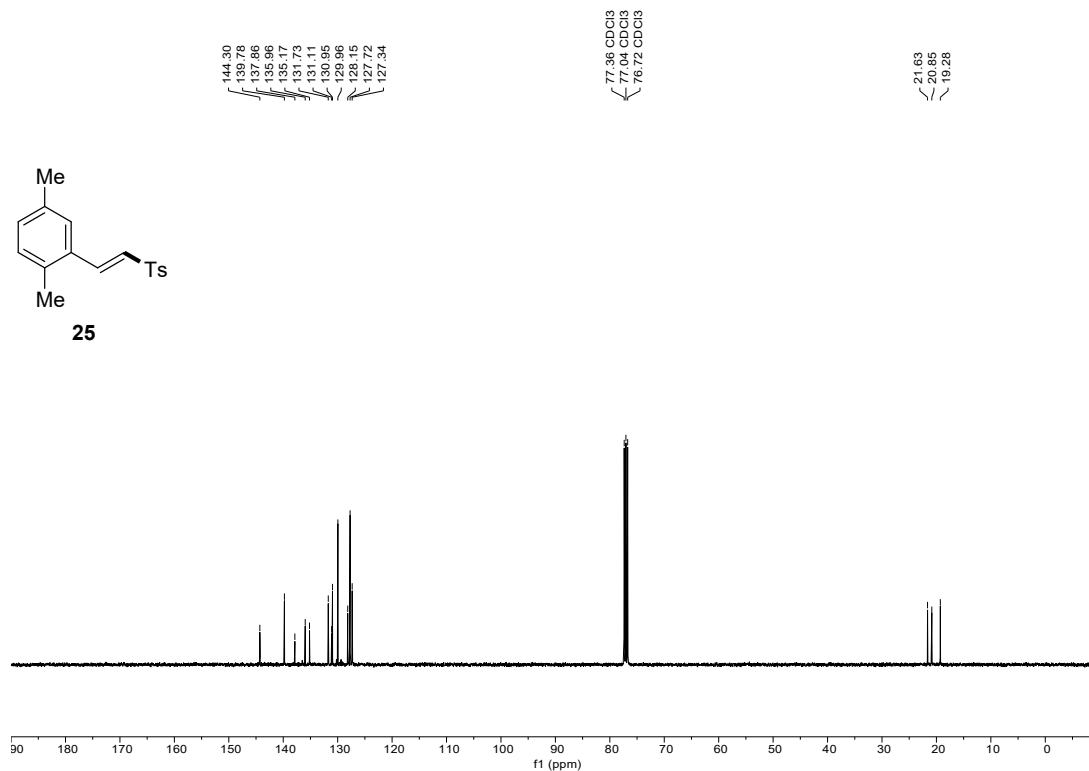

$^1\text{H}$  NMR ( $\text{CDCl}_3$ , 500 MHz) of **26**

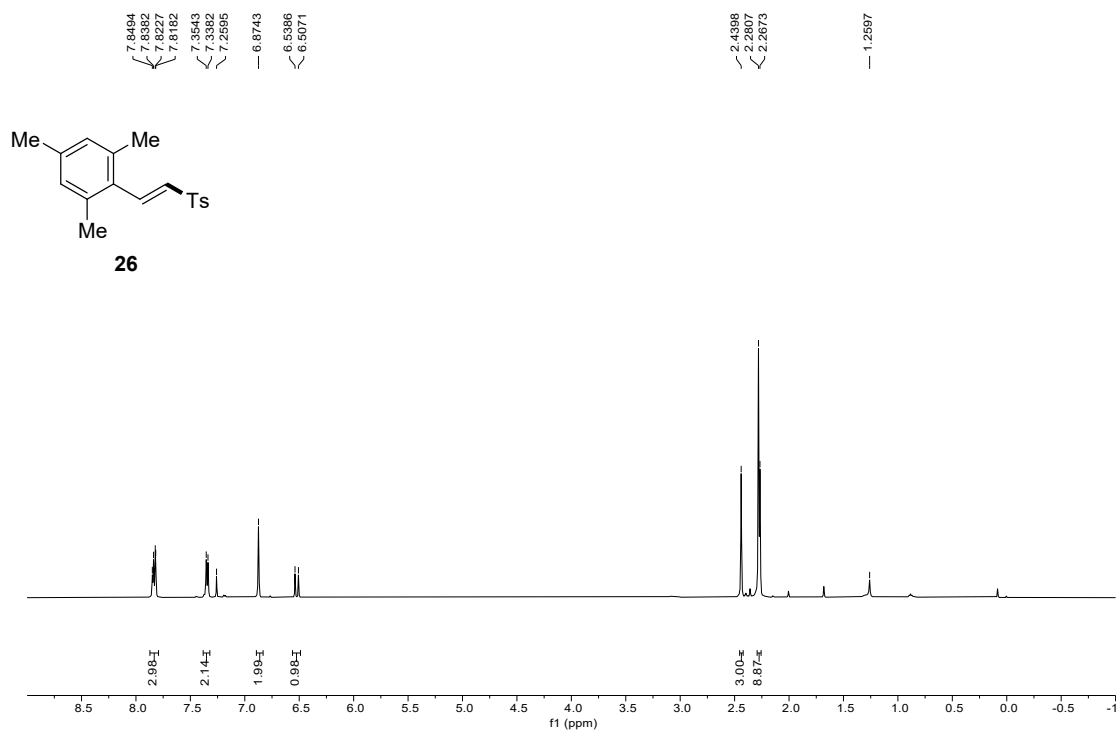

$^{13}\text{C}\{^1\text{H}\}$  NMR ( $\text{CDCl}_3$ , 125 MHz) of **26**

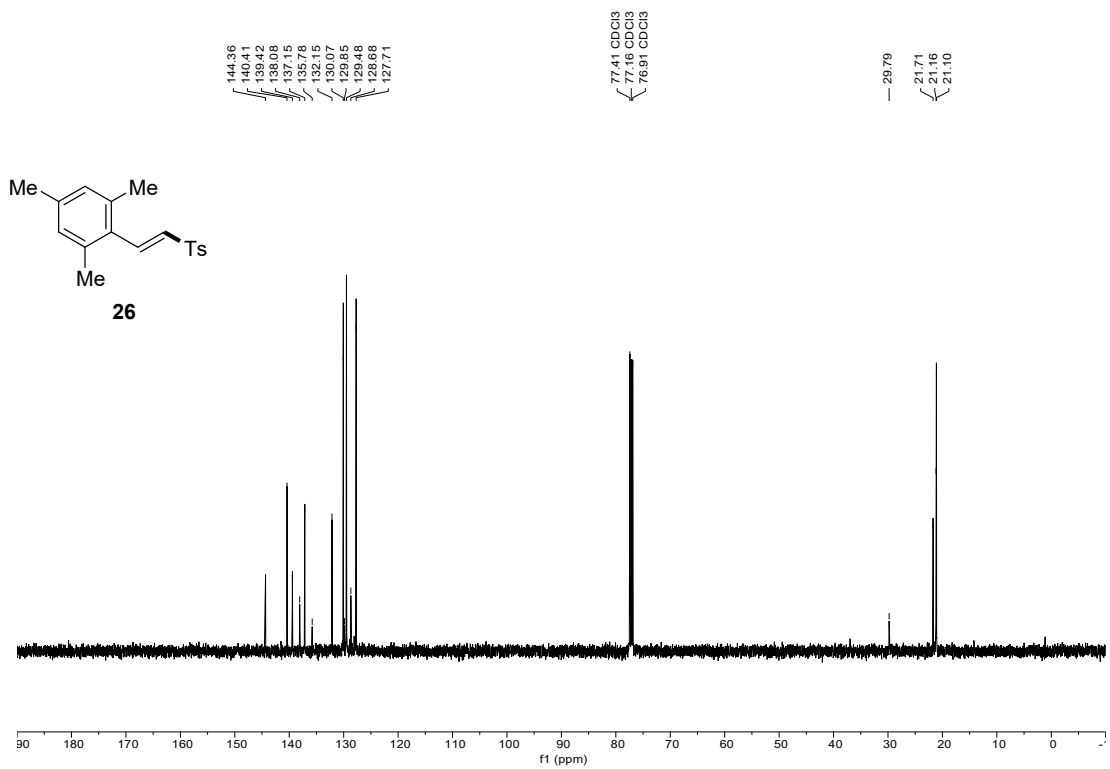

$^1\text{H}$  NMR ( $\text{CDCl}_3$ , 500 MHz) of **27**

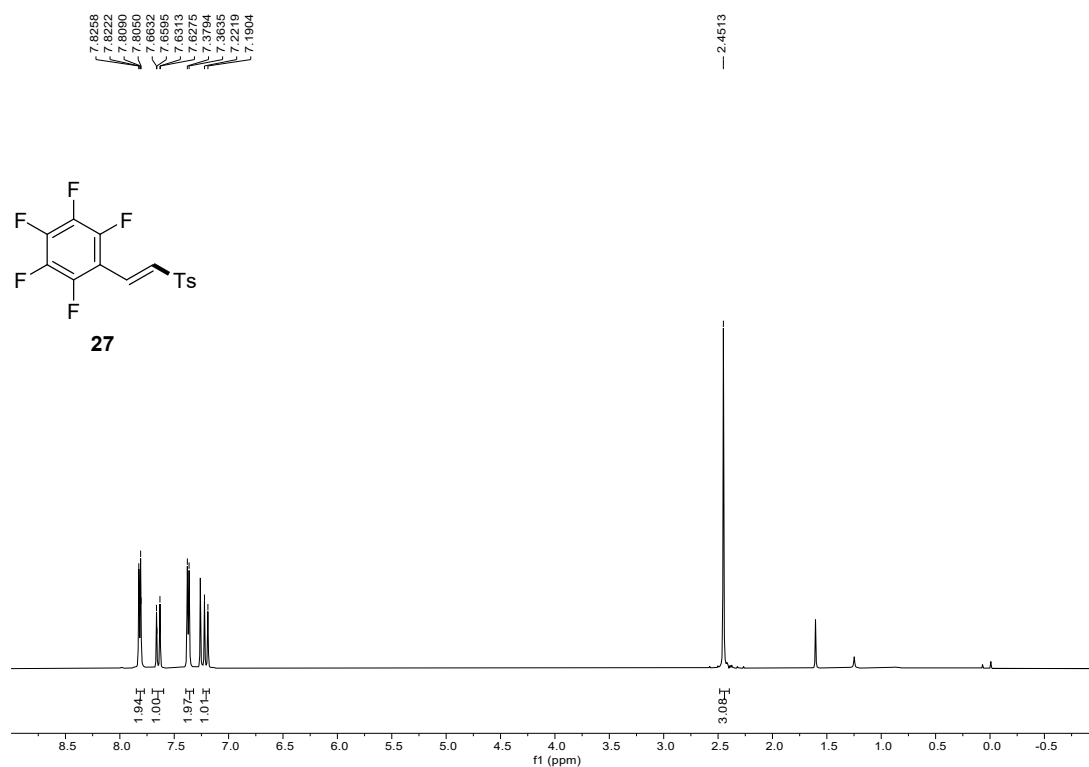

$^{13}\text{C}\{^1\text{H}\}$  NMR ( $\text{CDCl}_3$ , 125 MHz) of **27**

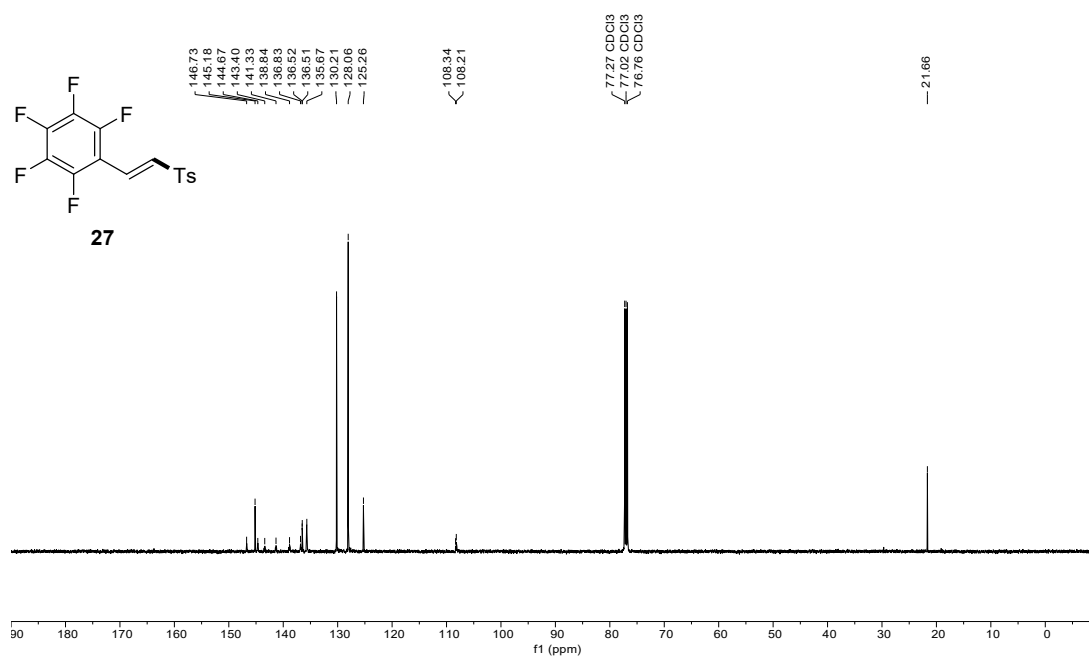

$^{19}\text{F}$  NMR ( $\text{CDCl}_3$ , 471 MHz) of **27**

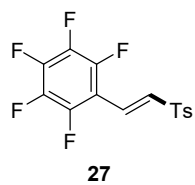

-138.23  
-138.24  
-138.25  
-138.26  
-138.28  
-138.29  
-138.30  
-138.31  
-146.90  
-146.91  
-148.95  
-148.99  
-160.69  
-160.70  
-160.71  
-160.74  
-160.75  
-160.76  
-160.78  
-160.81

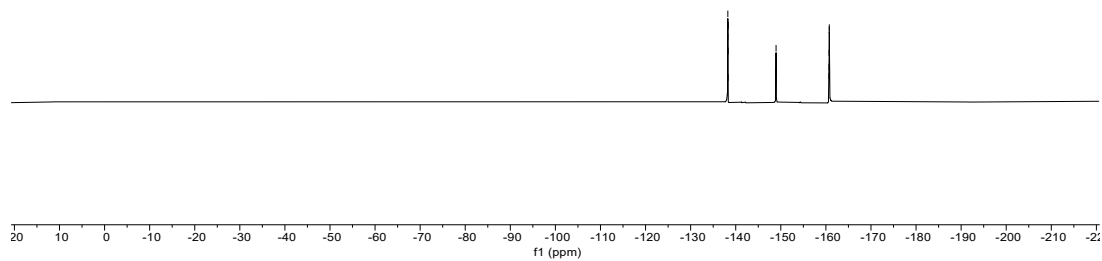

$^1\text{H}$  NMR ( $\text{CDCl}_3$ , 400 MHz) of **28**

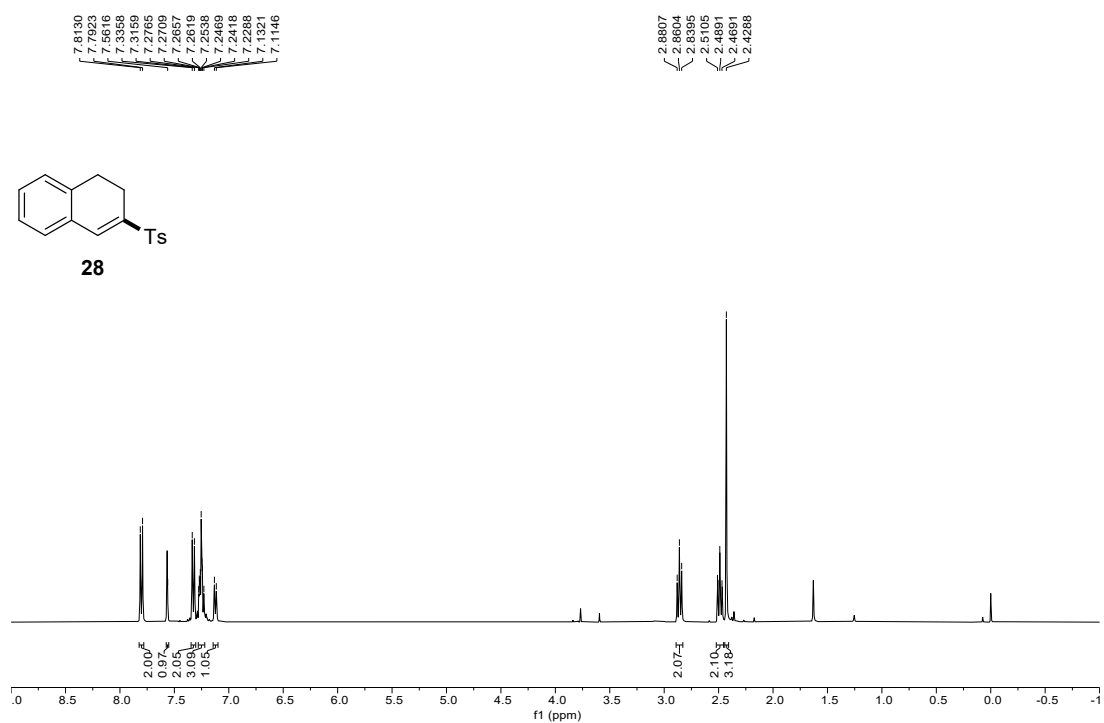

$^{13}\text{C}\{^1\text{H}\}$  NMR ( $\text{CDCl}_3$ , 100 MHz) of **28**

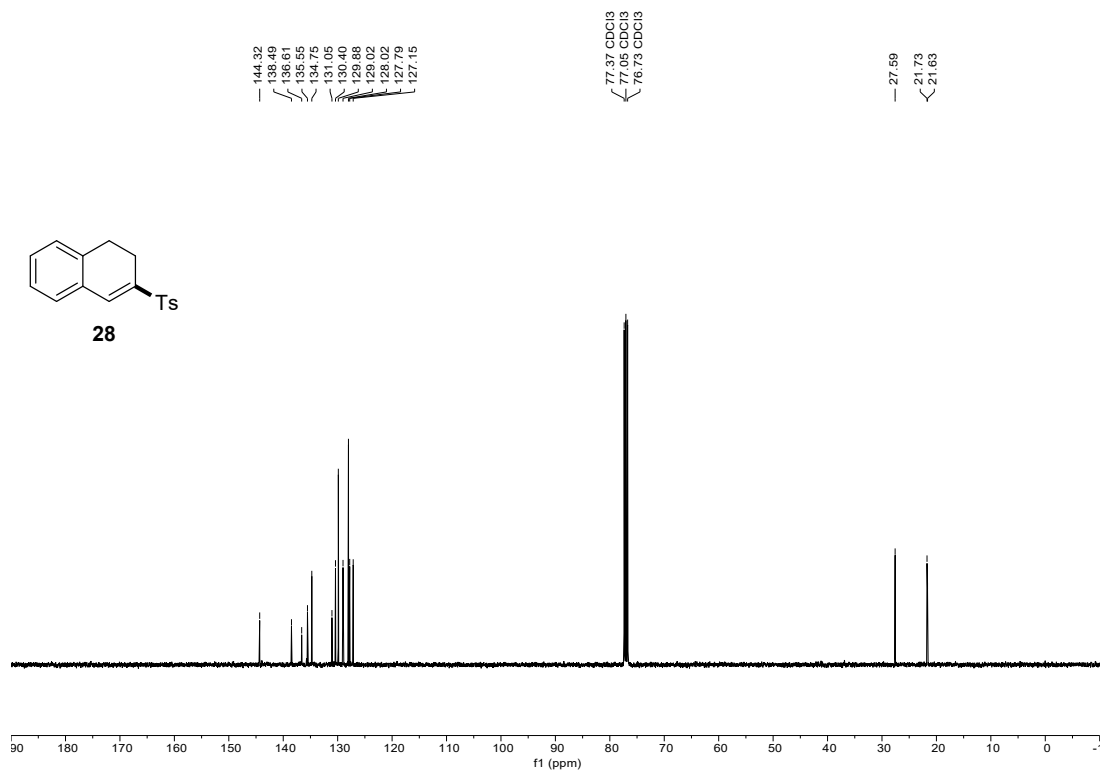



$^1\text{H}$  NMR ( $\text{CDCl}_3$ , 400 MHz) of **29**

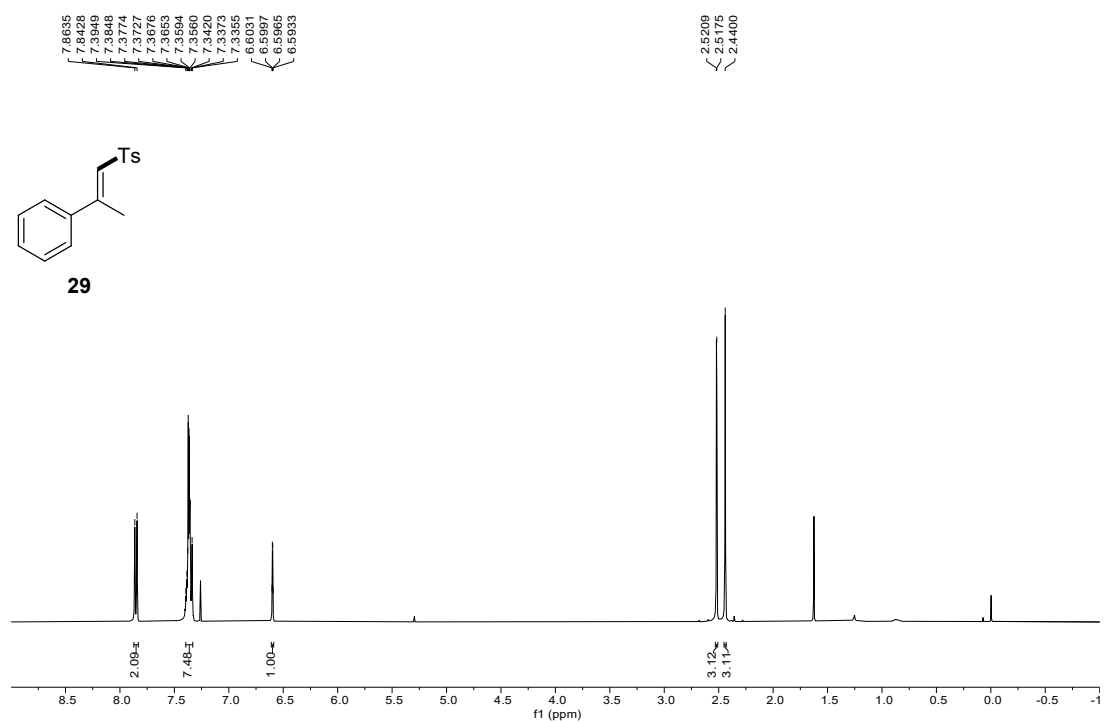

$^{13}\text{C}\{^1\text{H}\}$  NMR ( $\text{CDCl}_3$ , 100 MHz) of **29**

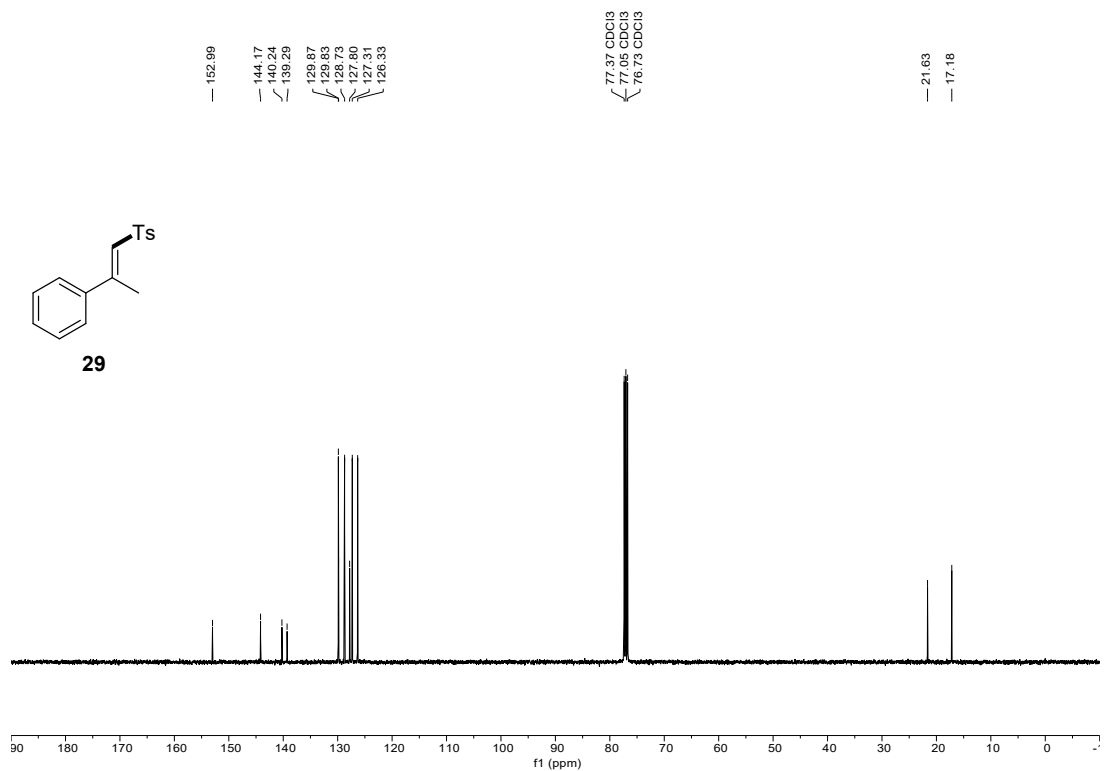

# $^1\text{H}$ NMR ( $\text{CDCl}_3$ , 400 MHz) of **30**

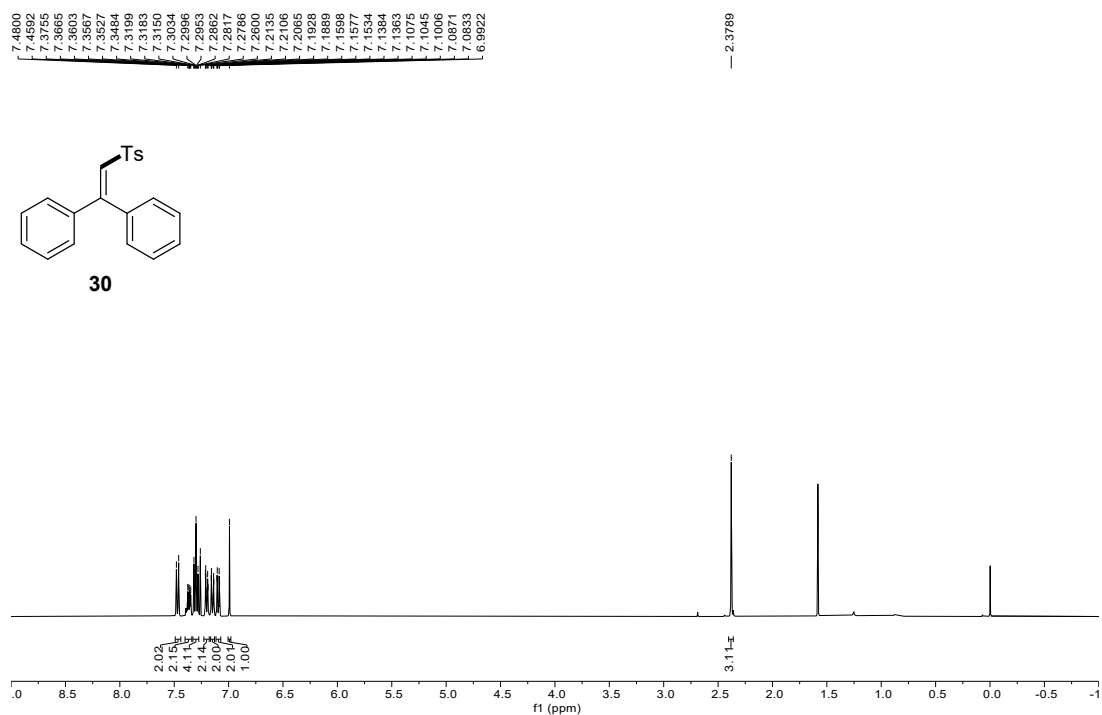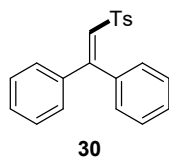

# $^{13}\text{C}\{^1\text{H}\}$ NMR ( $\text{CDCl}_3$ , 100 MHz) of **30**

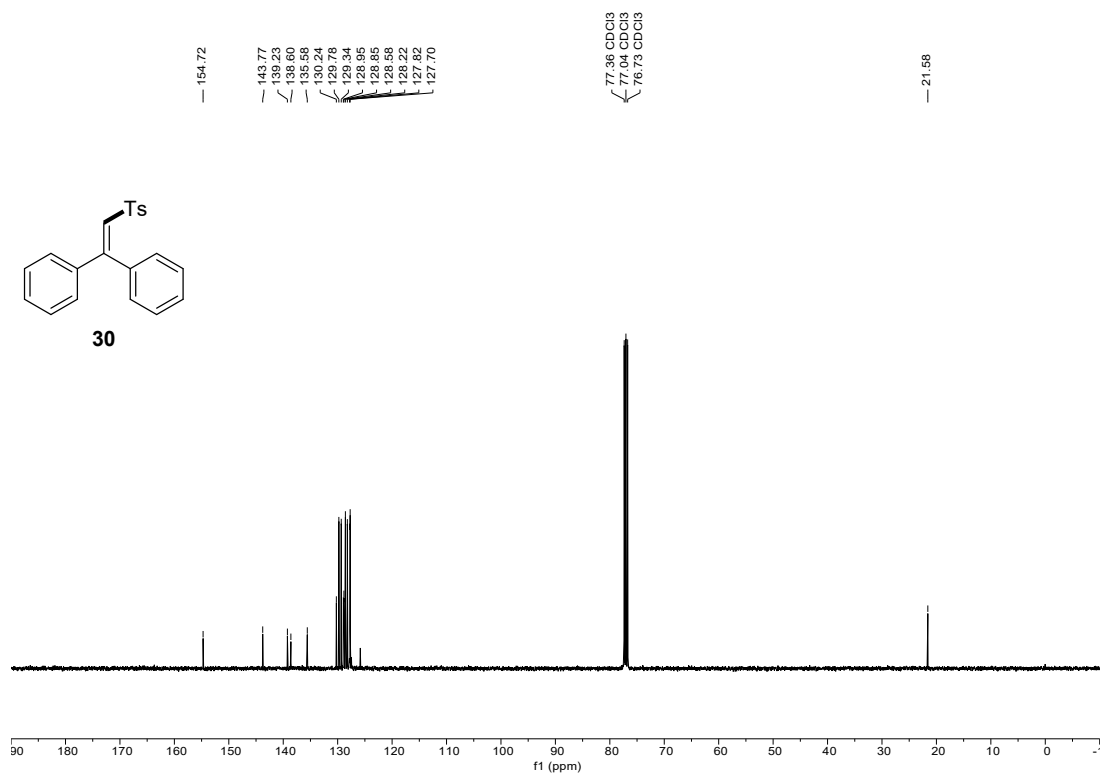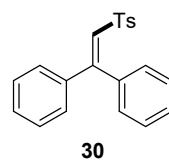

$^1\text{H}$  NMR ( $\text{CDCl}_3$ , 500 MHz) of **31**

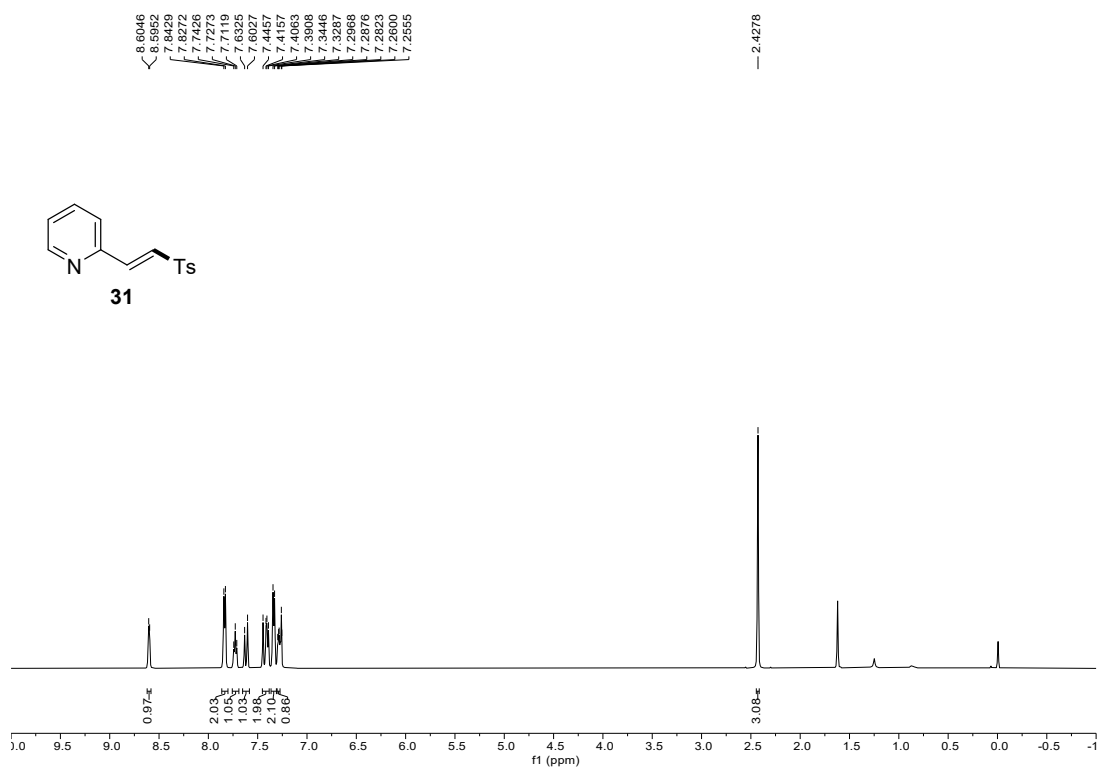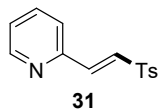

$^{13}\text{C}\{^1\text{H}\}$  NMR ( $\text{CDCl}_3$ , 125 MHz) of **31**

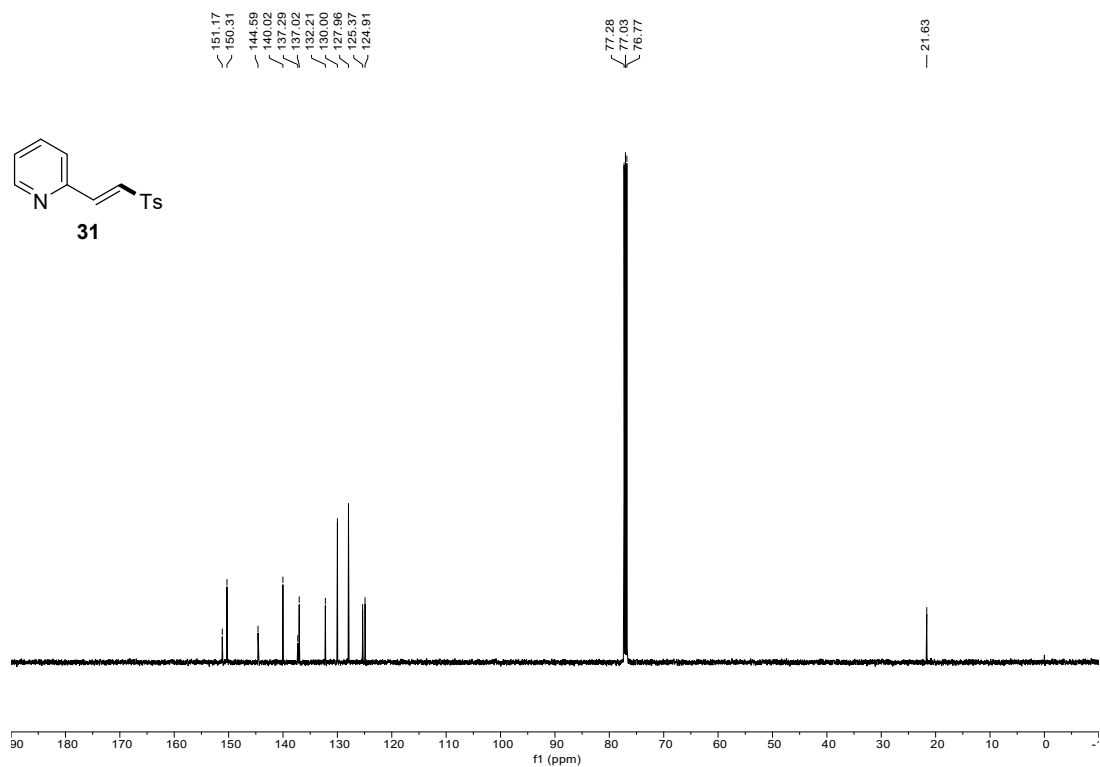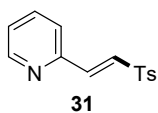

$^1\text{H}$  NMR ( $\text{CDCl}_3$ , 400 MHz) of **32**

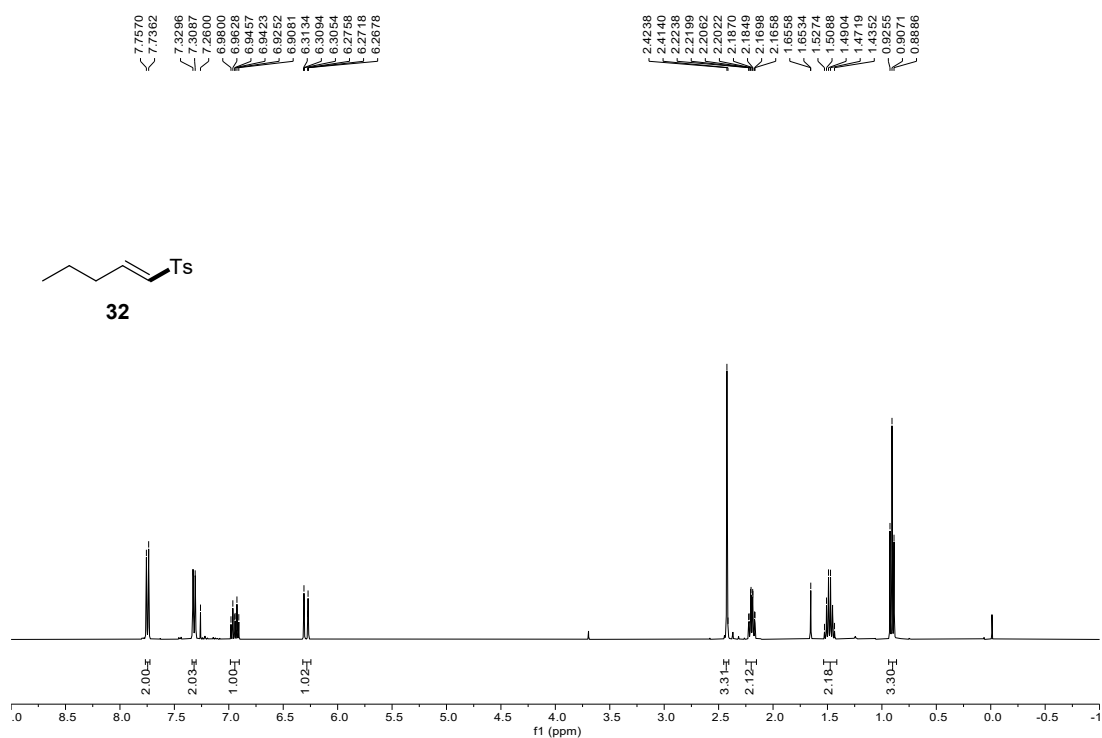

$^{13}\text{C}$  { $^1\text{H}$ } NMR ( $\text{CDCl}_3$ , 100 MHz) of **32**

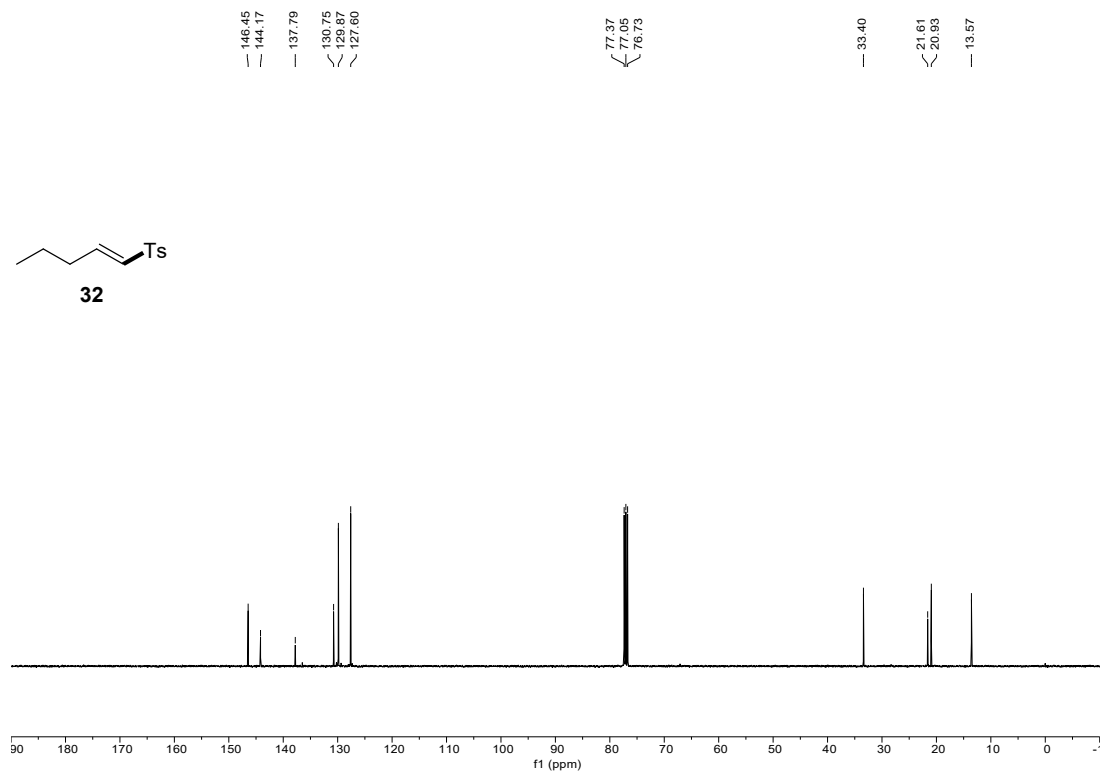

$^1\text{H}$  NMR ( $\text{CDCl}_3$ , 400 MHz) of **33**

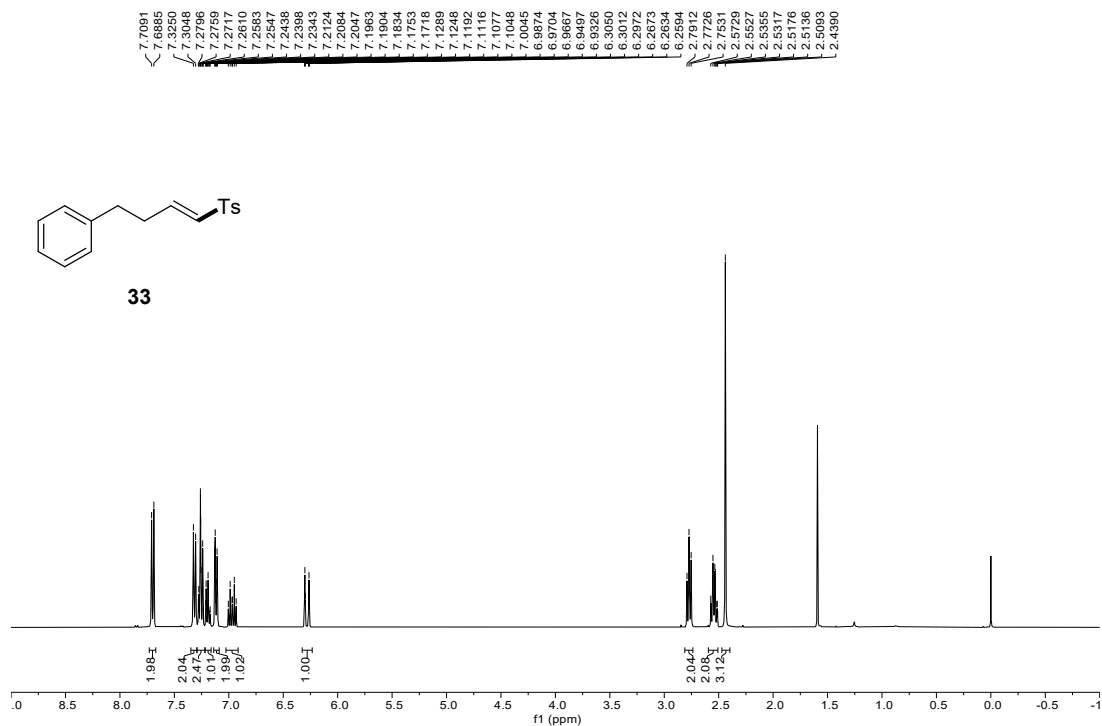

$^{13}\text{C}$   $\{^1\text{H}\}$  NMR ( $\text{CDCl}_3$ , 100 MHz) of **33**

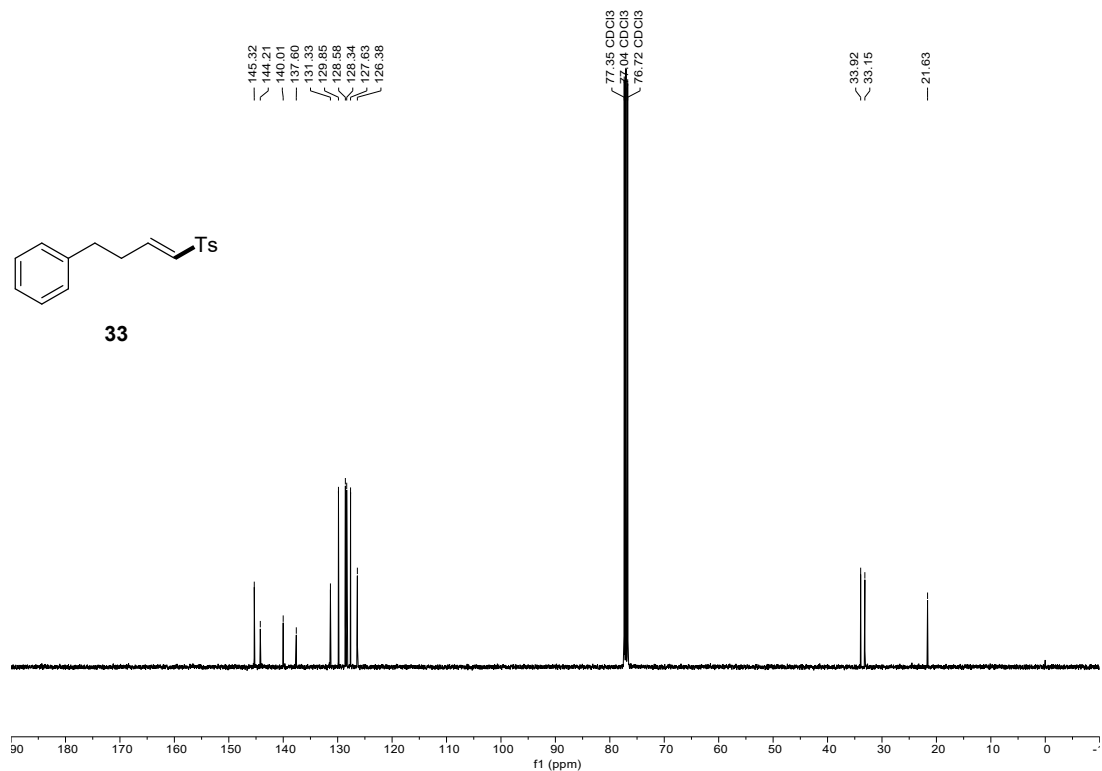

$^1\text{H}$  NMR ( $\text{CDCl}_3$ , 600 MHz) of **34**

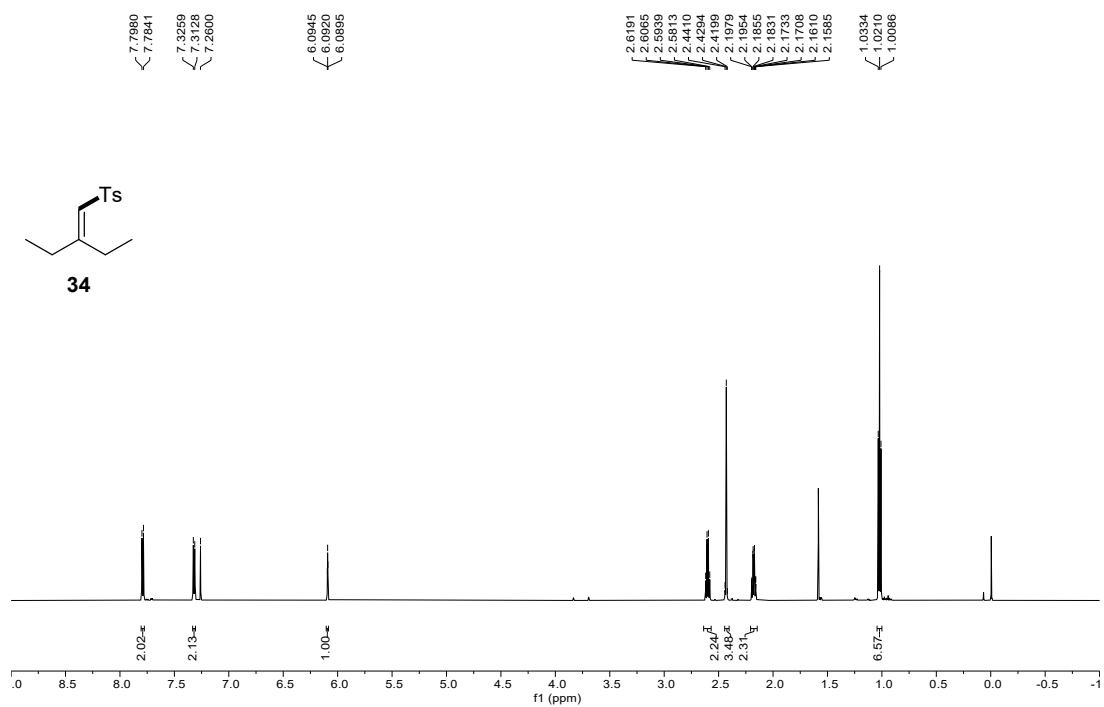

$^{13}\text{C}\{^1\text{H}\}$  NMR ( $\text{CDCl}_3$ , 150 MHz) of **34**

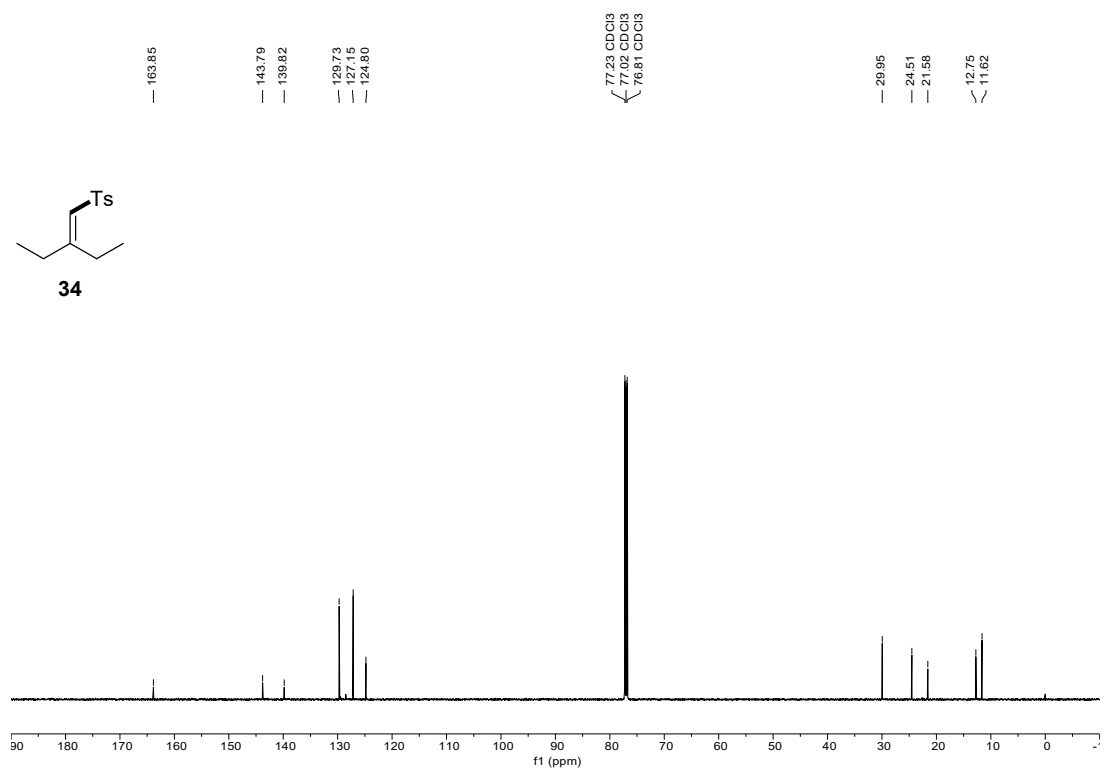

$^1\text{H}$  NMR ( $\text{CDCl}_3$ , 400 MHz) of **35**

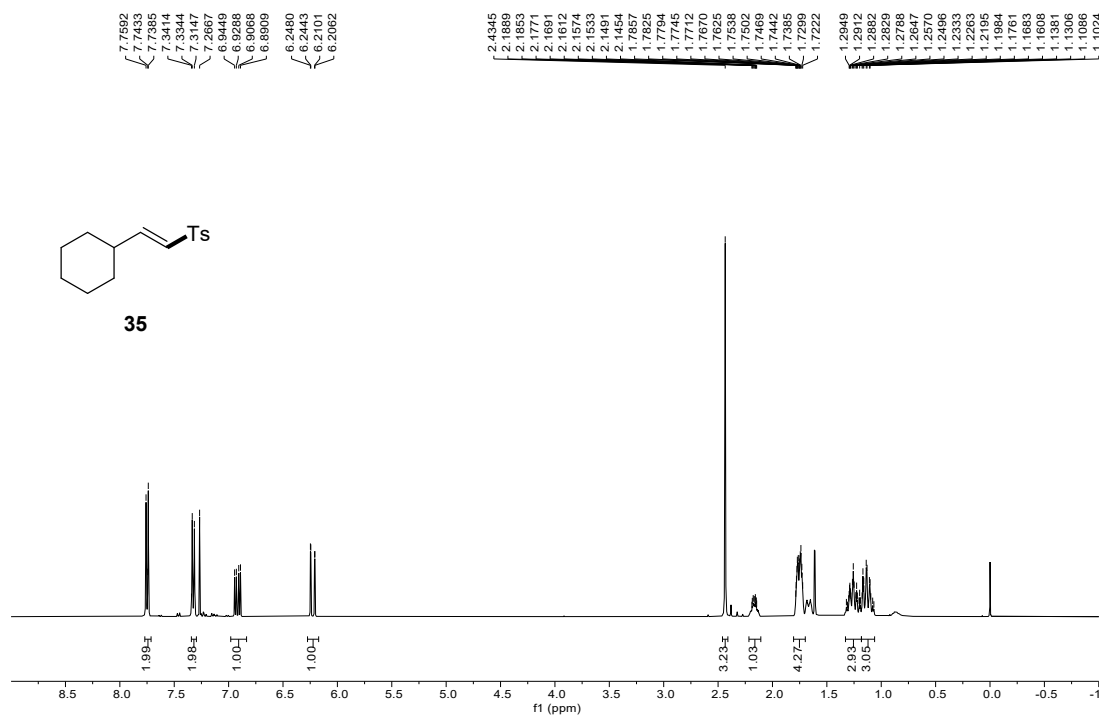

$^{13}\text{C}\{^1\text{H}\}$  NMR ( $\text{CDCl}_3$ , 100 MHz) of **35**

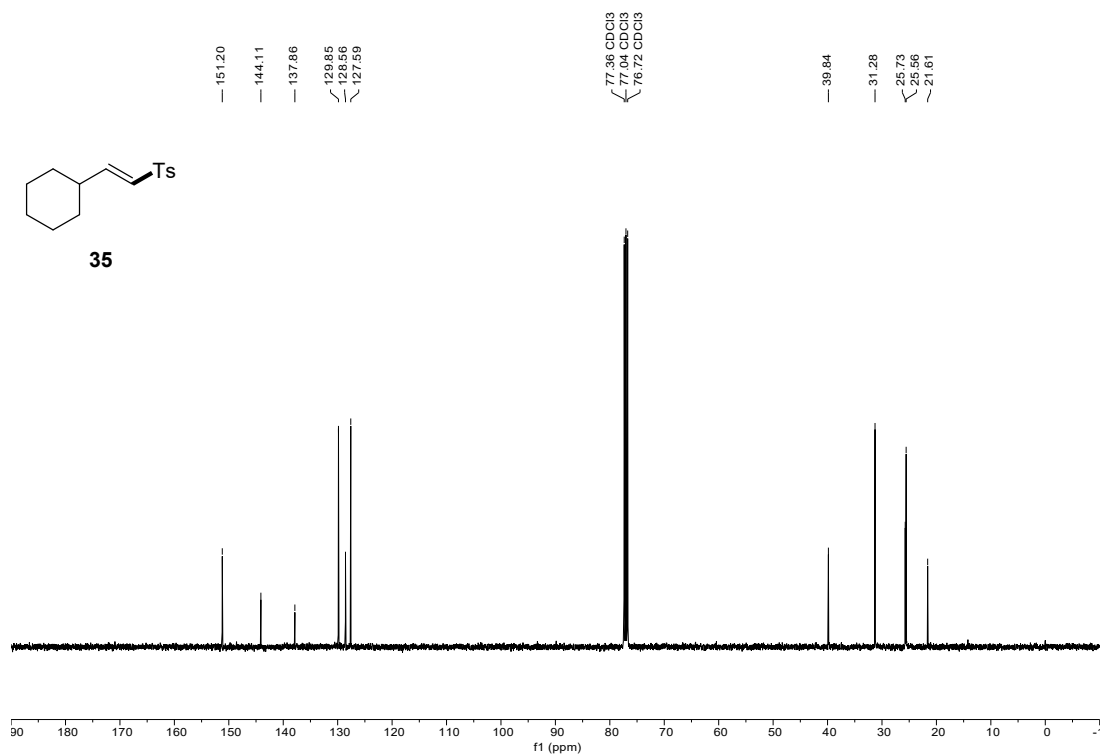

$^1\text{H}$  NMR ( $\text{CDCl}_3$ , 400 MHz) of **36**

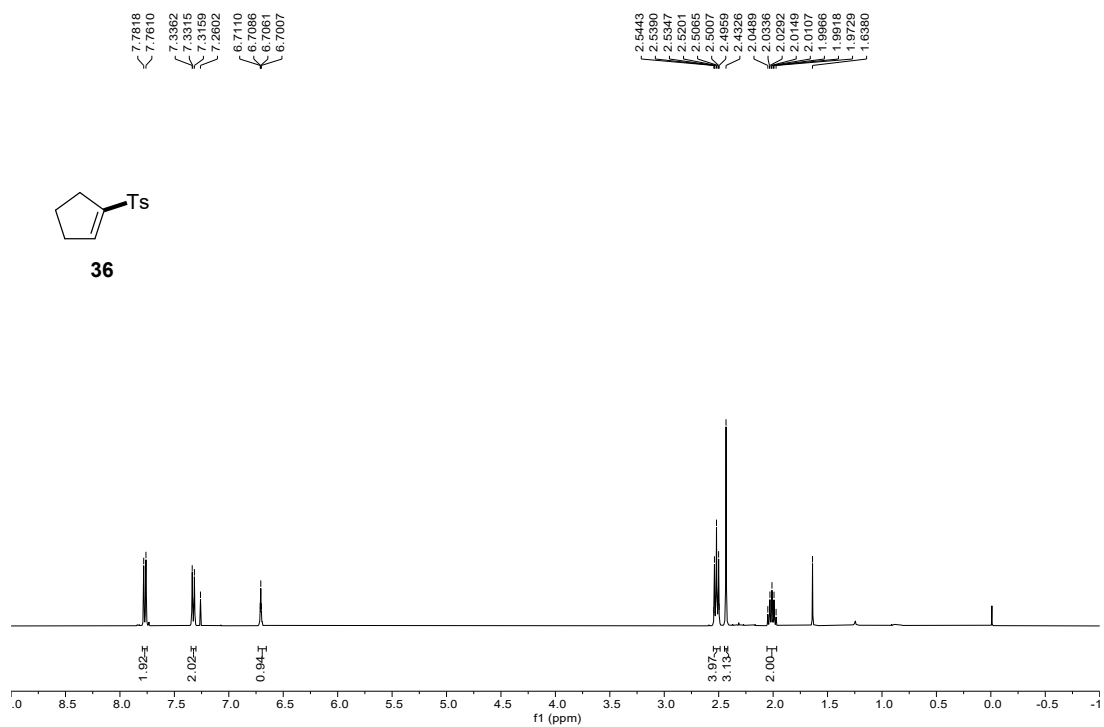

$^{13}\text{C}\{^1\text{H}\}$  NMR ( $\text{CDCl}_3$ , 100 MHz) of **36**

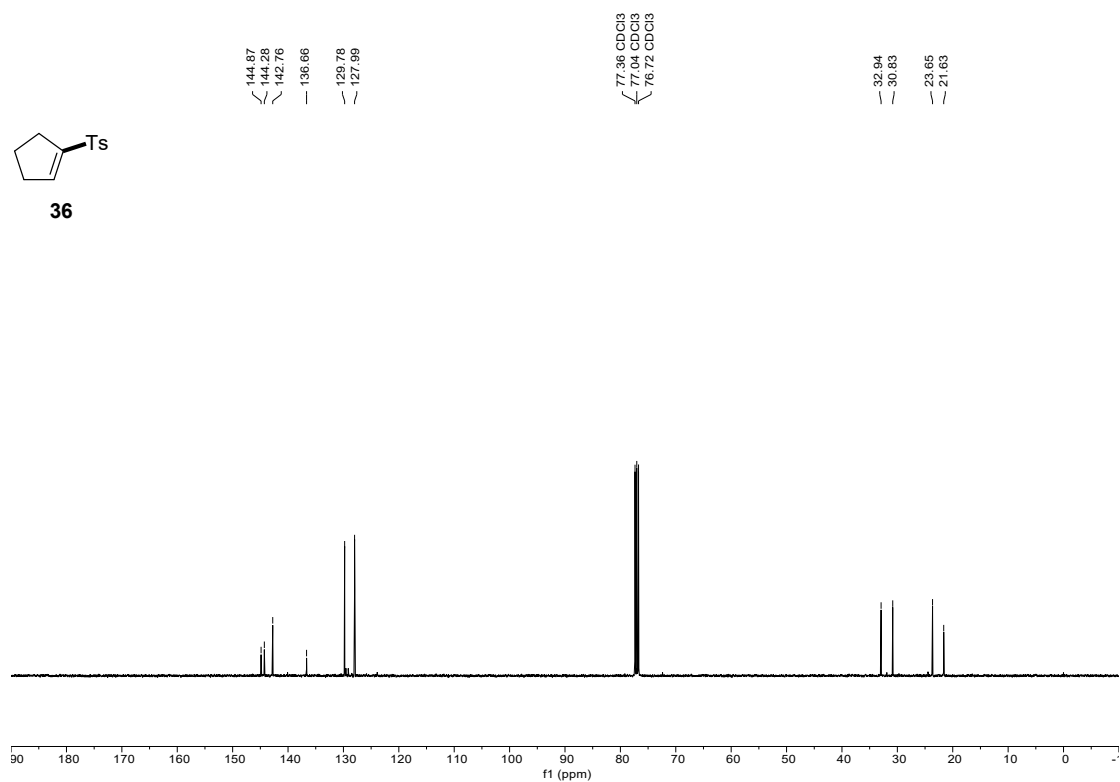



$^1\text{H}$  NMR ( $\text{CDCl}_3$ , 400 MHz) of **37**

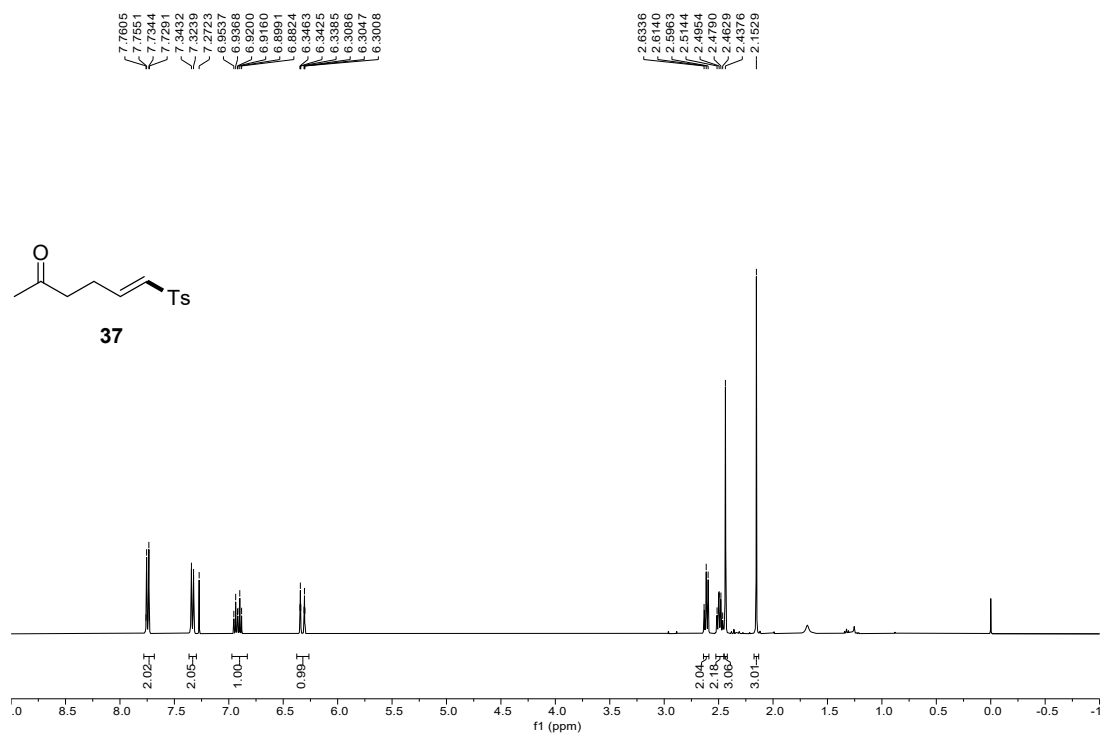

$^{13}\text{C}\{^1\text{H}\}$  NMR ( $\text{CDCl}_3$ , 100 MHz) of **37**

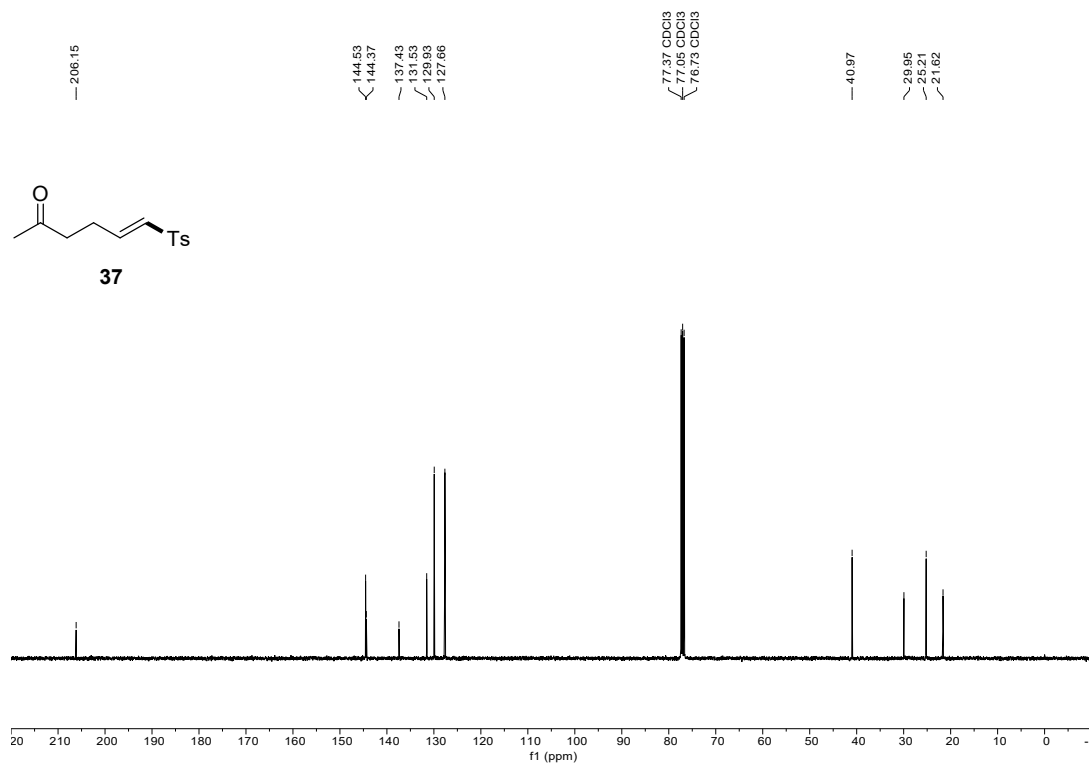

$^1\text{H}$  NMR ( $\text{CDCl}_3$ , 400 MHz) of **38**

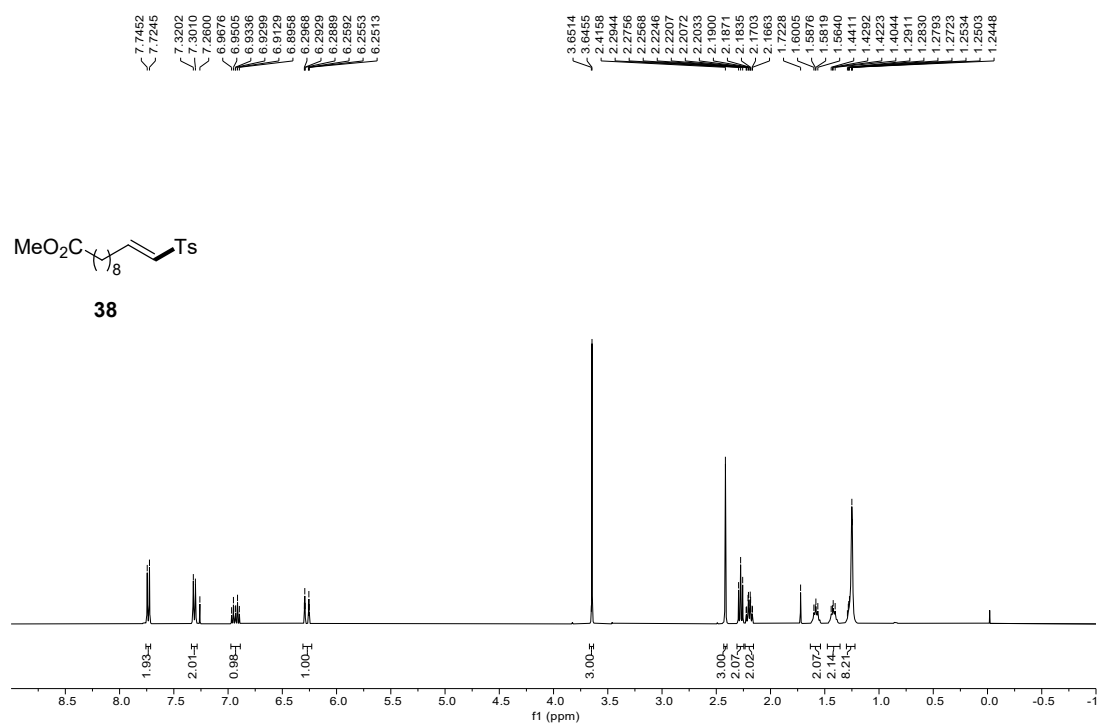

$^{13}\text{C}\{^1\text{H}\}$  NMR ( $\text{CDCl}_3$ , 100 MHz) of **38**

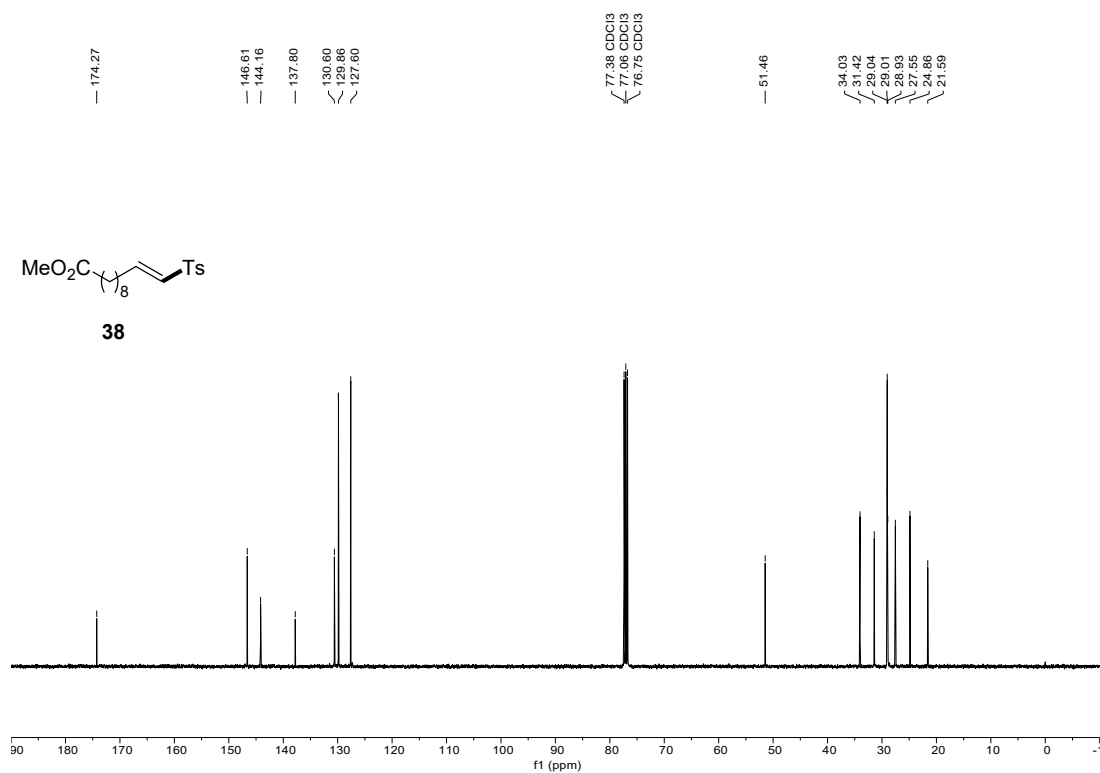

$^1\text{H}$  NMR ( $\text{CDCl}_3$ , 400 MHz) of **39**

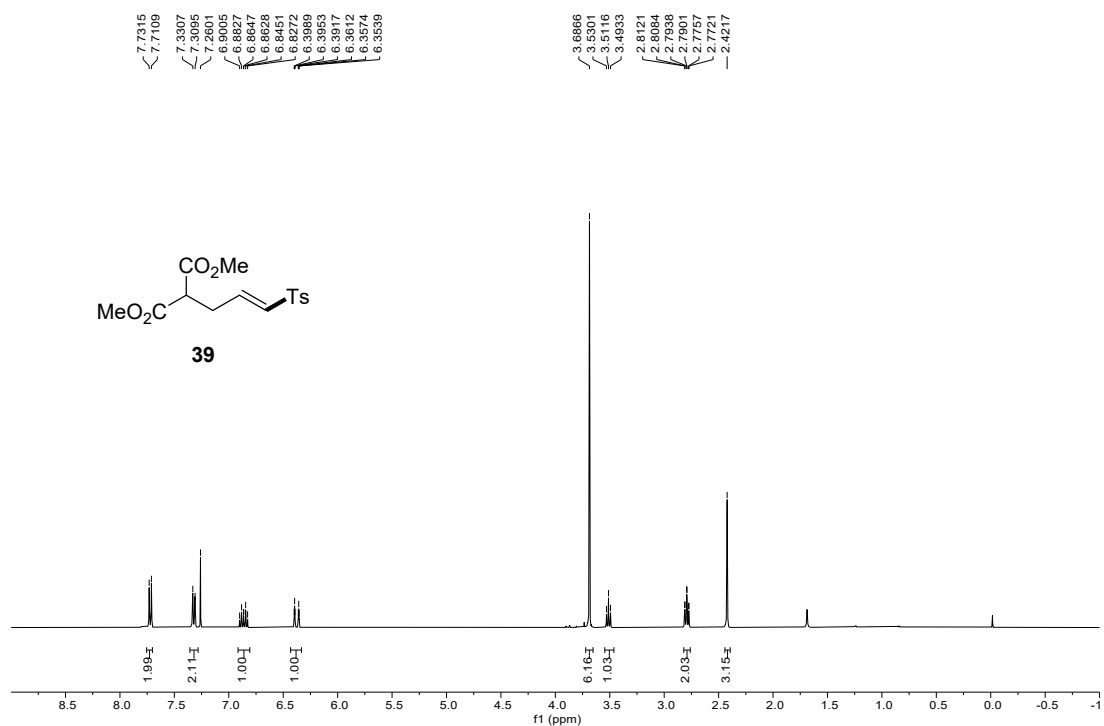

$^{13}\text{C}\{^1\text{H}\}$  NMR ( $\text{CDCl}_3$ , 100 MHz) of **39**

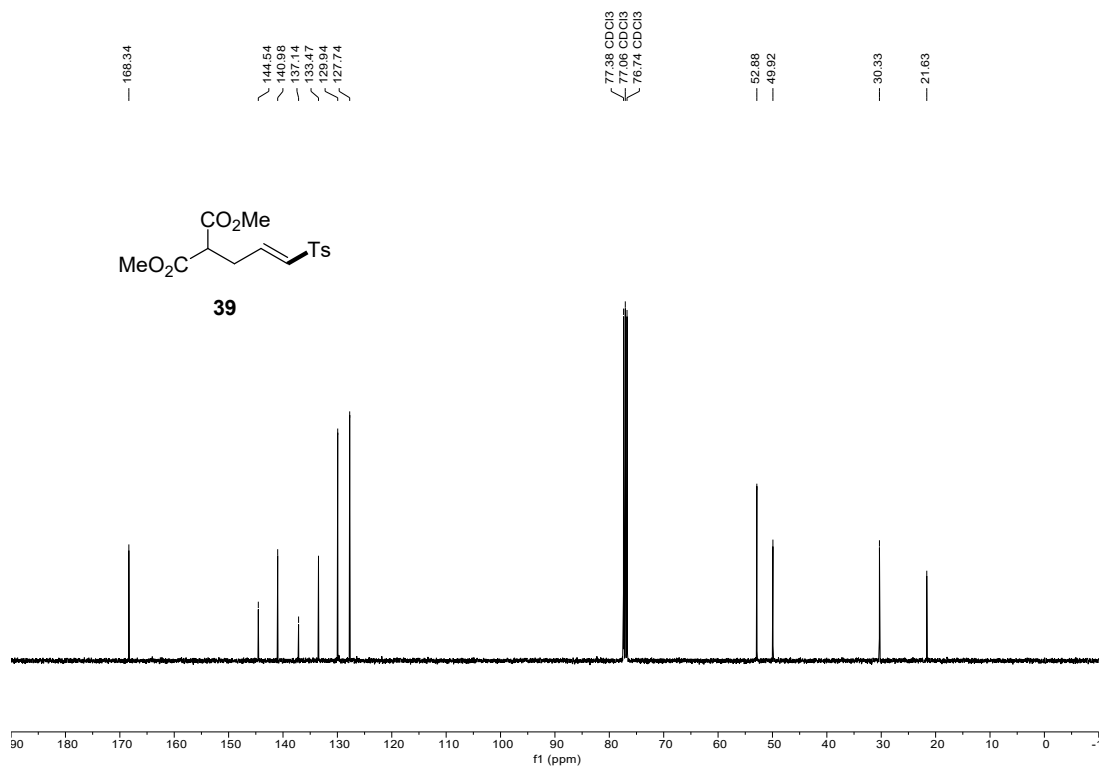

$^1\text{H}$  NMR ( $\text{CDCl}_3$ , 400 MHz) of **40**

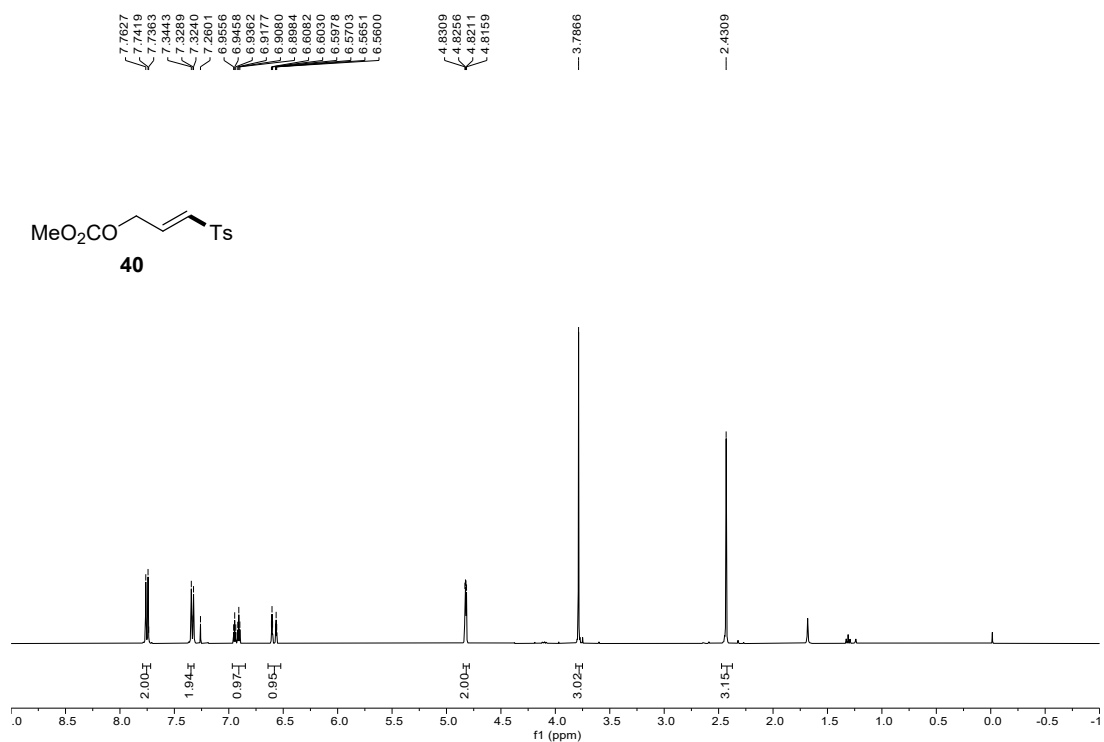

$^{13}\text{C}$   $\{^1\text{H}\}$  NMR ( $\text{CDCl}_3$ , 100 MHz) of **40**

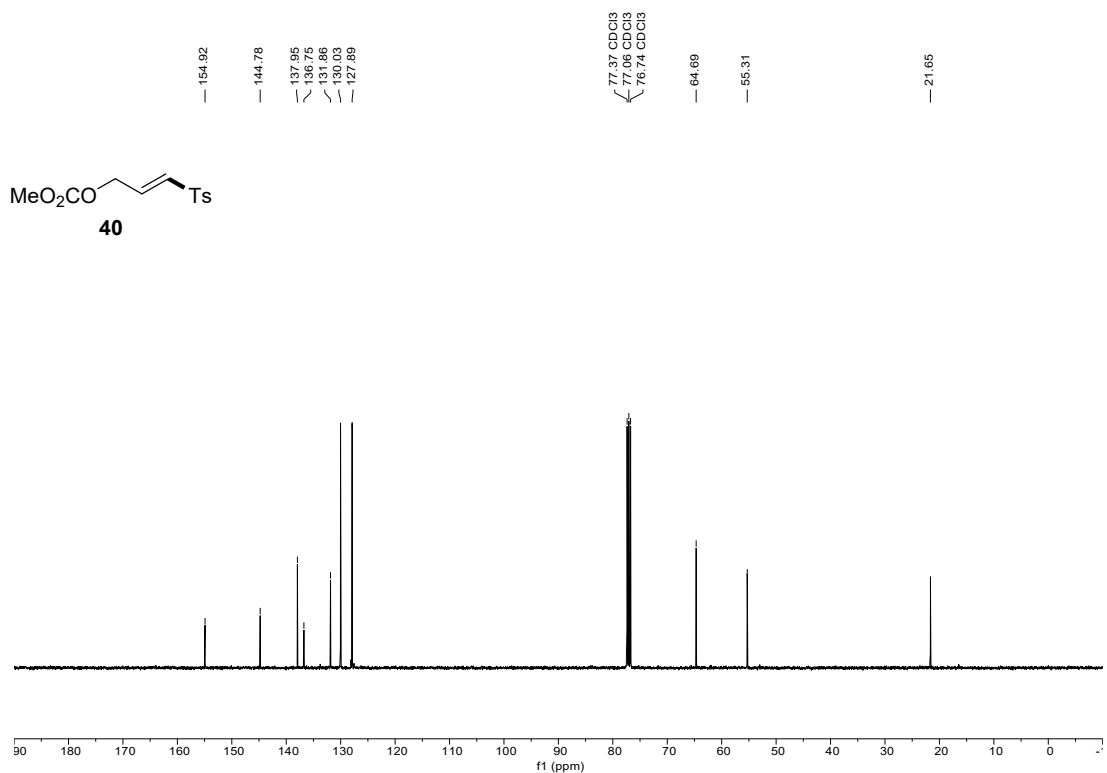

$^1\text{H}$  NMR ( $\text{CDCl}_3$ , 400 MHz) of **41**

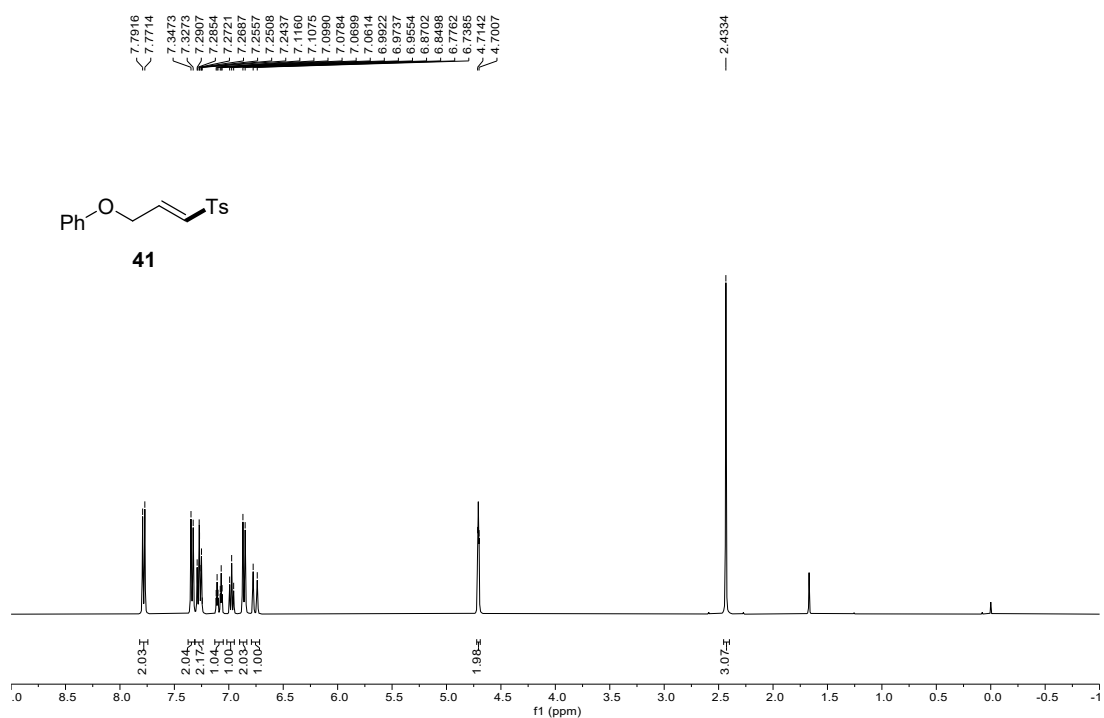

$^{13}\text{C}\{^1\text{H}\}$  NMR ( $\text{CDCl}_3$ , 100 MHz) of **41**

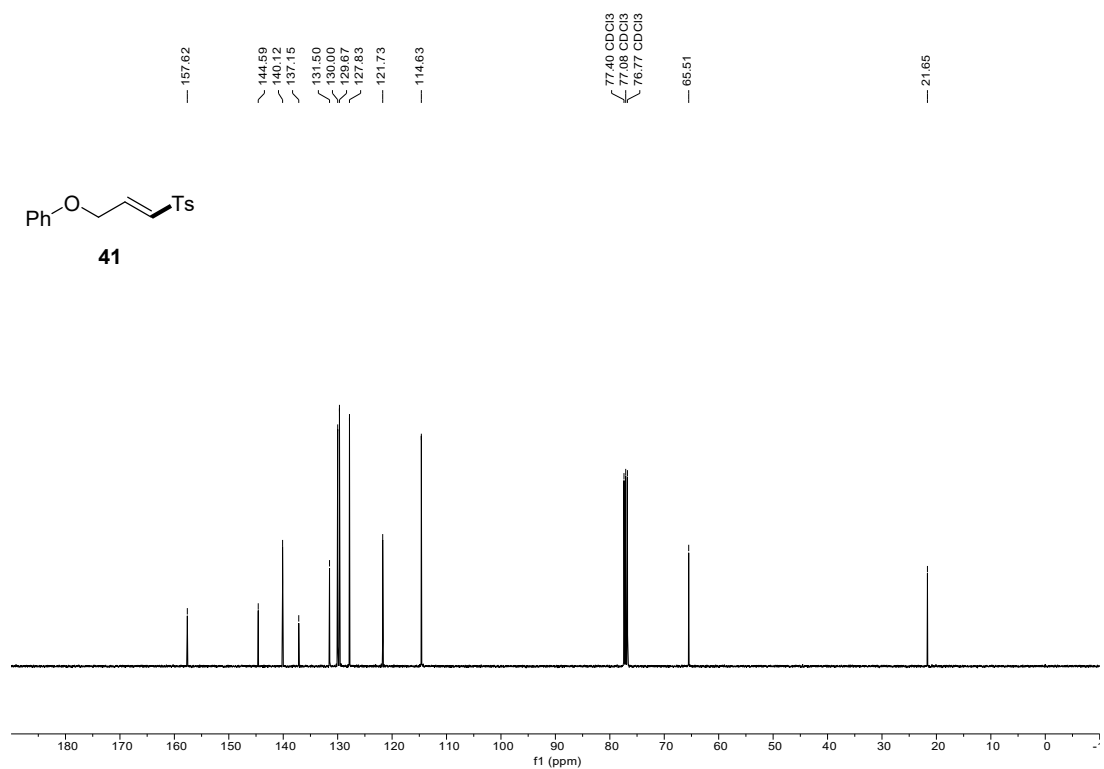

$^1\text{H}$  NMR ( $\text{CDCl}_3$ , 500 MHz) of **42**

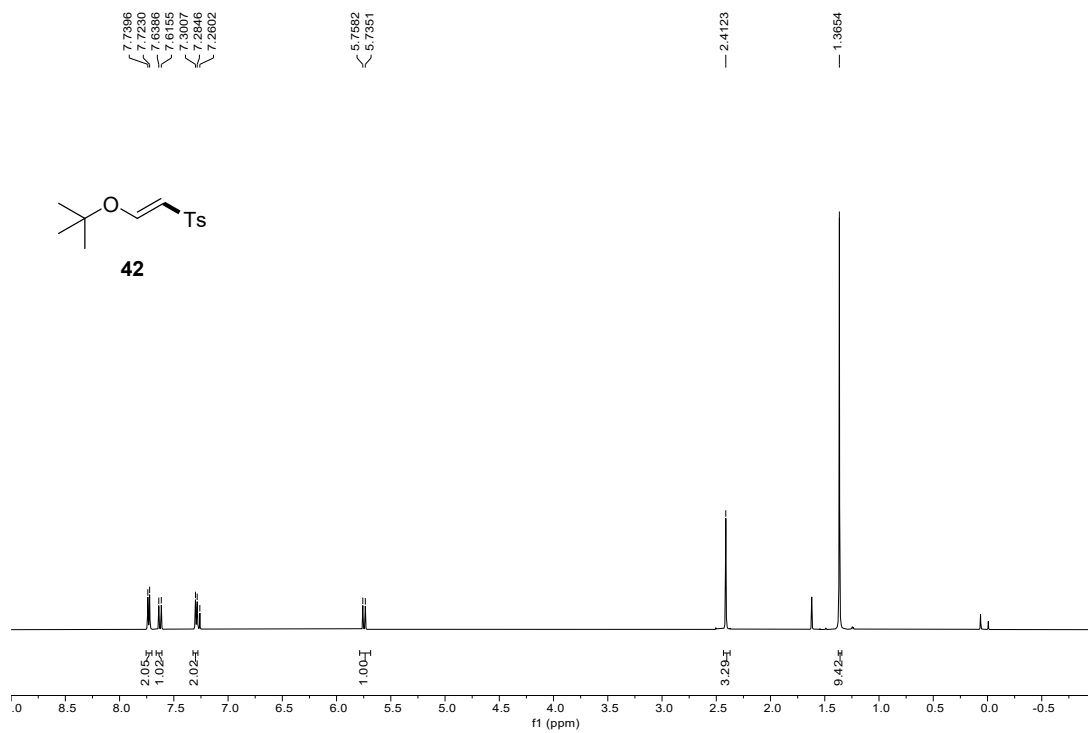

$^{13}\text{C}\{^1\text{H}\}$  NMR ( $\text{CDCl}_3$ , 125 MHz) of **42**

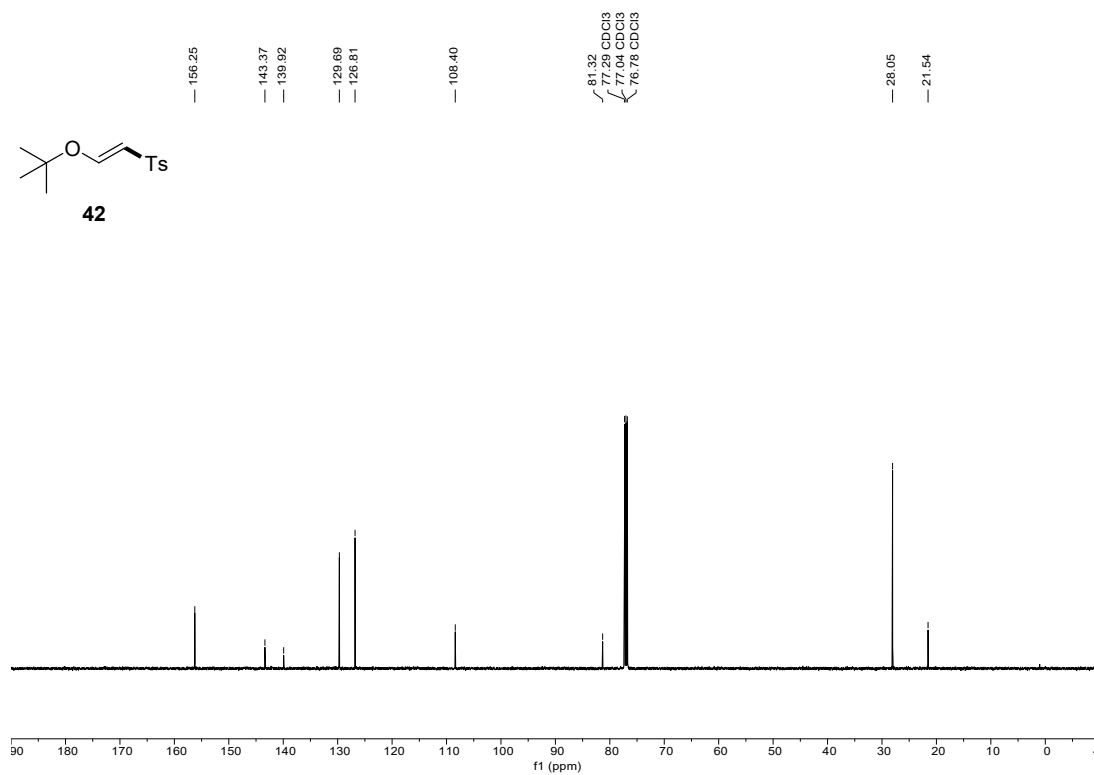

$^1\text{H}$  NMR ( $\text{CDCl}_3$ , 500 MHz) of **43**

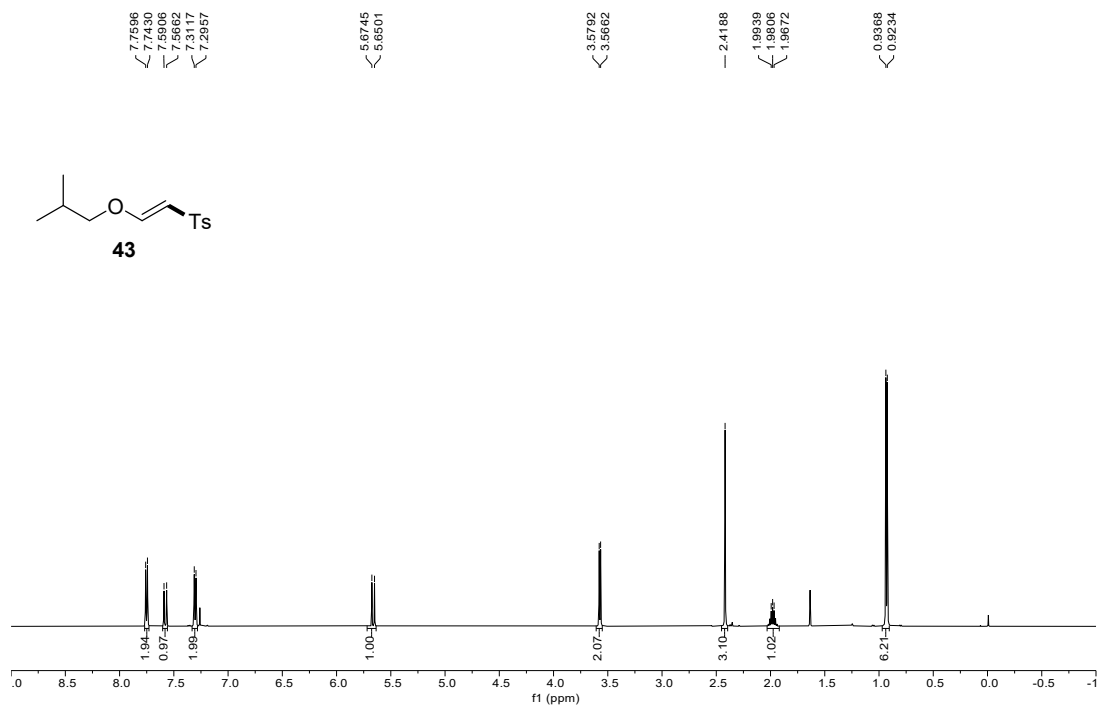

$^{13}\text{C}\{^1\text{H}\}$  NMR ( $\text{CDCl}_3$ , 125 MHz) of **43**

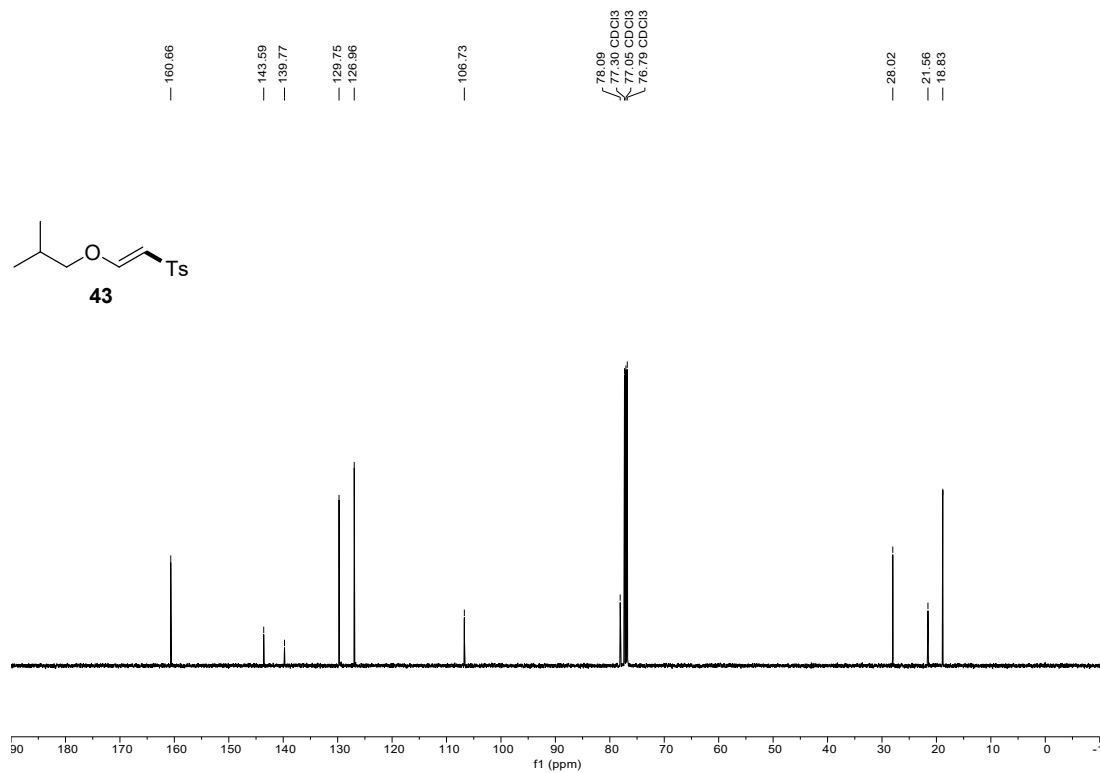

$^1\text{H}$  NMR ( $\text{CDCl}_3$ , 600 MHz) of **44**

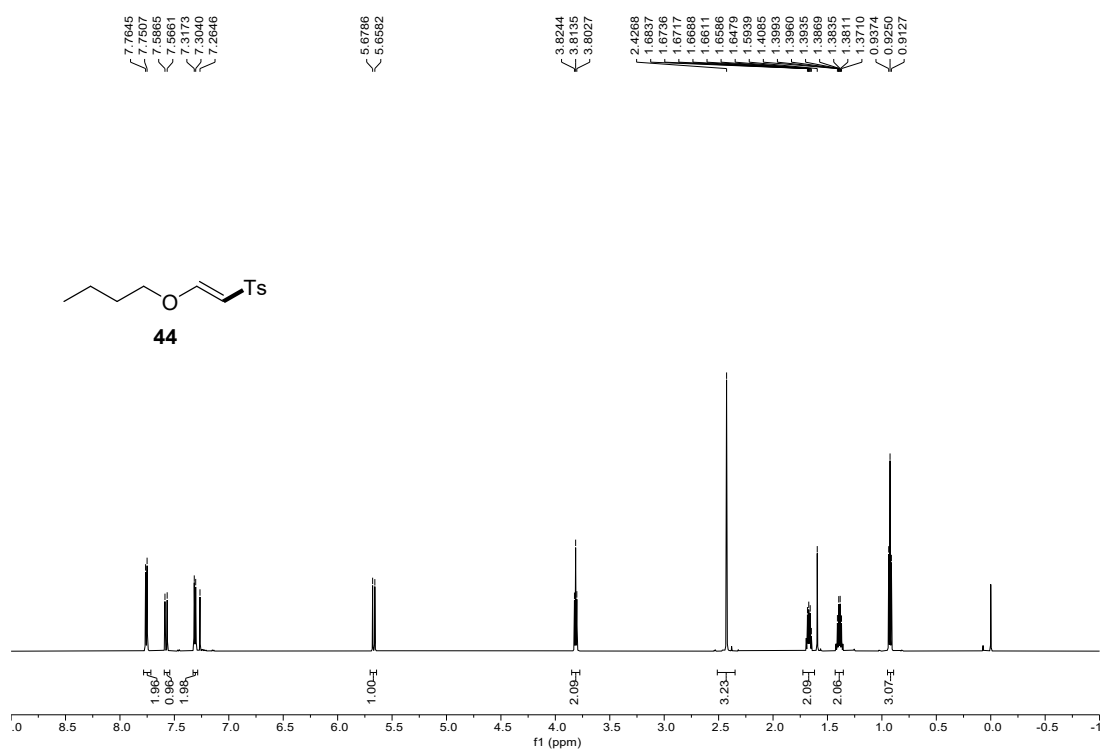

$^{13}\text{C}$  { $^1\text{H}$ } NMR ( $\text{CDCl}_3$ , 150 MHz) of **44**

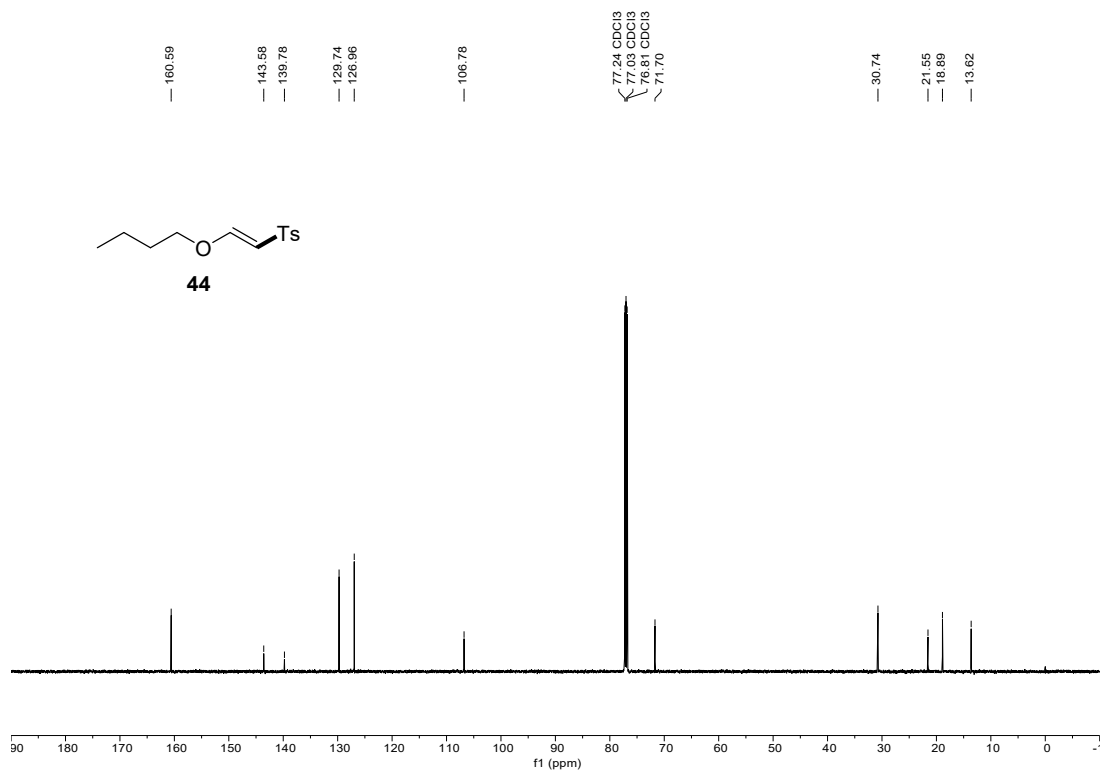





$^1\text{H}$  NMR ( $\text{CDCl}_3$ , 600 MHz) of **46**

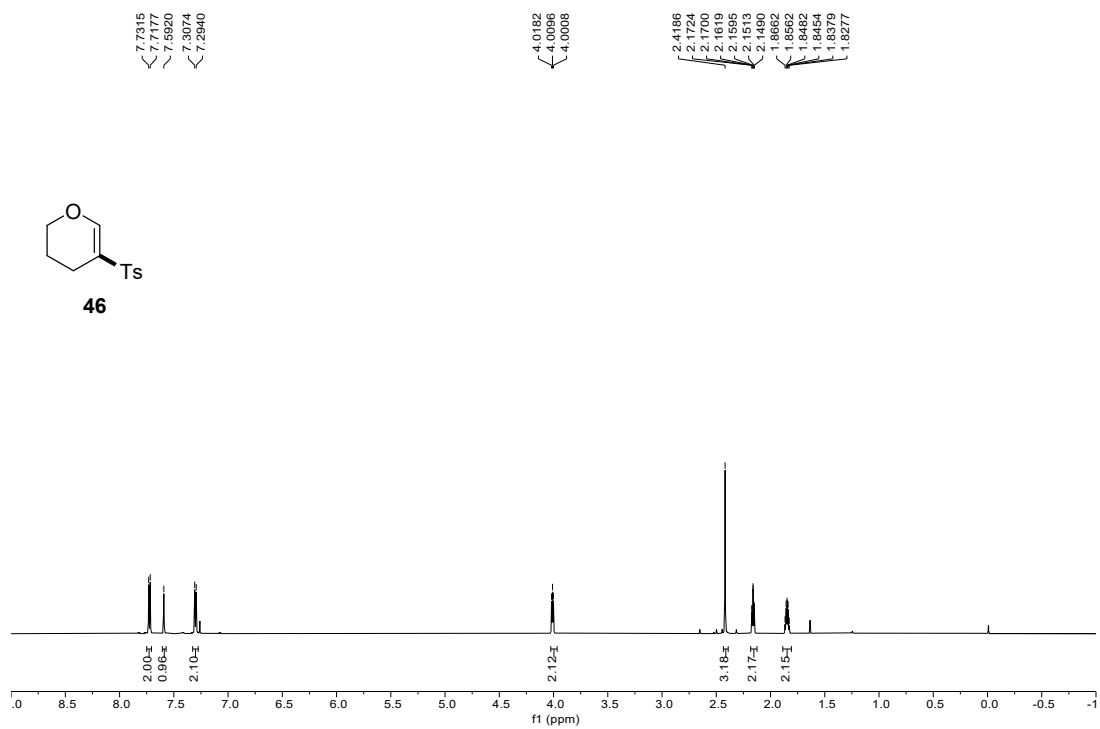

$^{13}\text{C}\{^1\text{H}\}$  NMR ( $\text{CDCl}_3$ , 150 MHz) of **46**

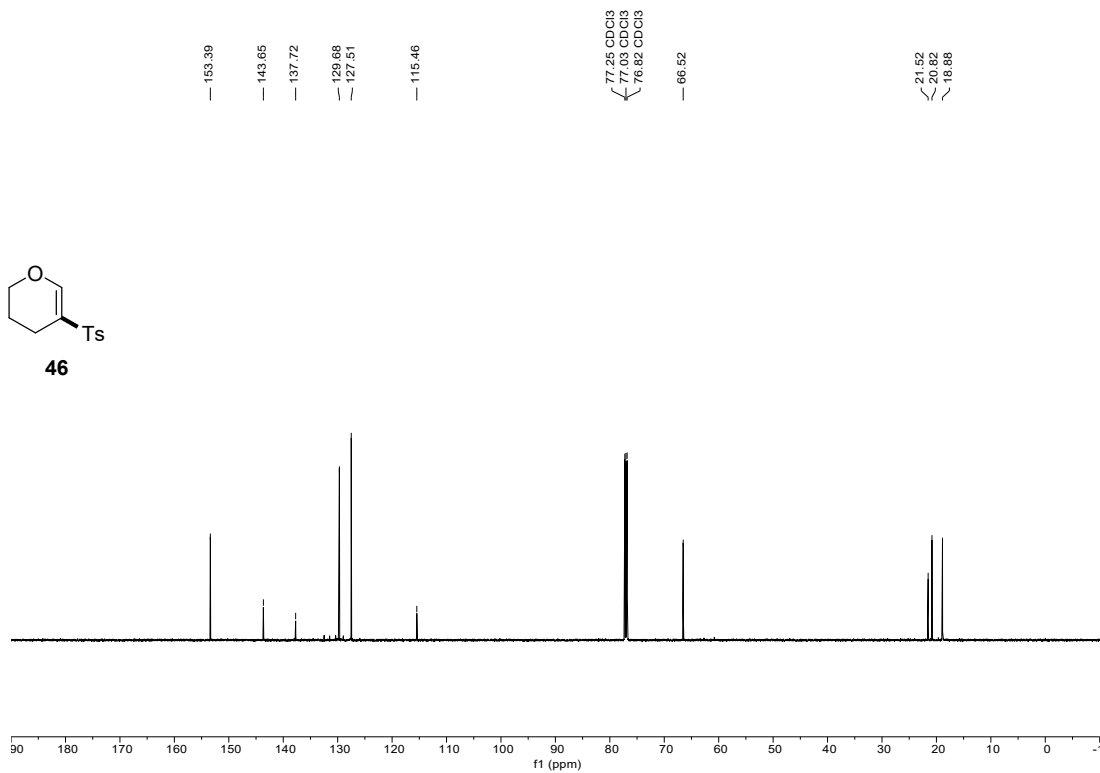

$^1\text{H}$  NMR ( $\text{CDCl}_3$ , 400 MHz) of **47**

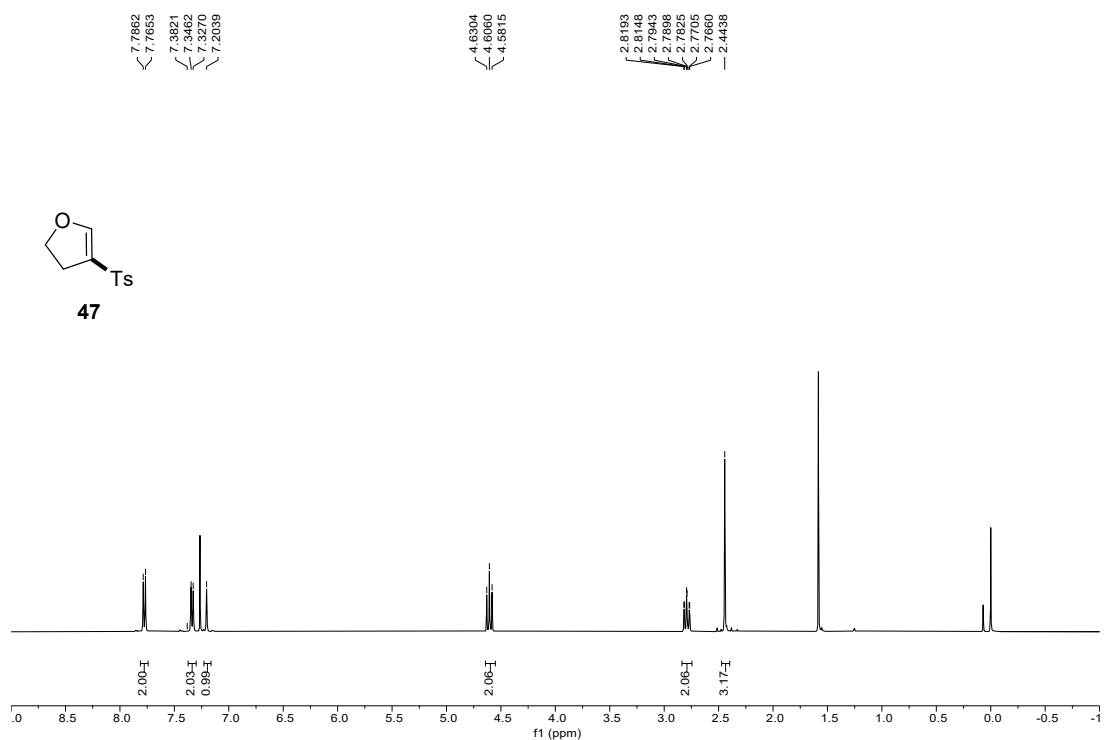

$^{13}\text{C}\{^1\text{H}\}$  NMR ( $\text{CDCl}_3$ , 100 MHz) of **47**

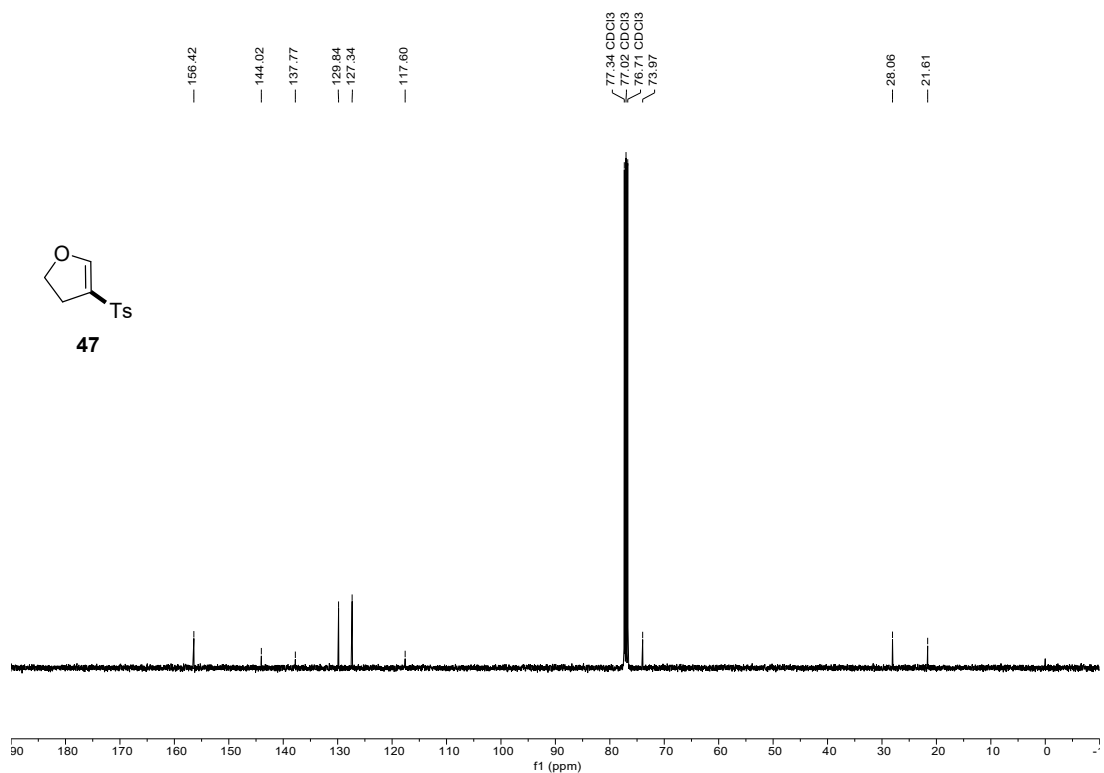

$^1\text{H}$  NMR ( $\text{CDCl}_3$ , 500 MHz) of **48**

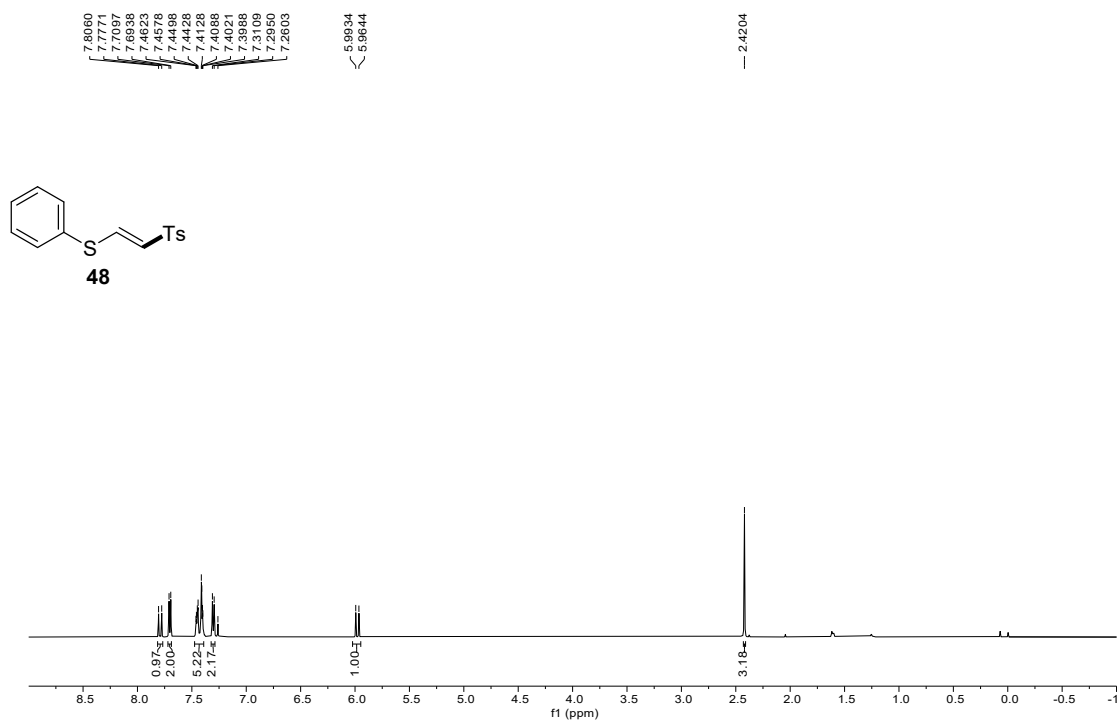

$^{13}\text{C}\{^1\text{H}\}$  NMR ( $\text{CDCl}_3$ , 125 MHz) of **48**

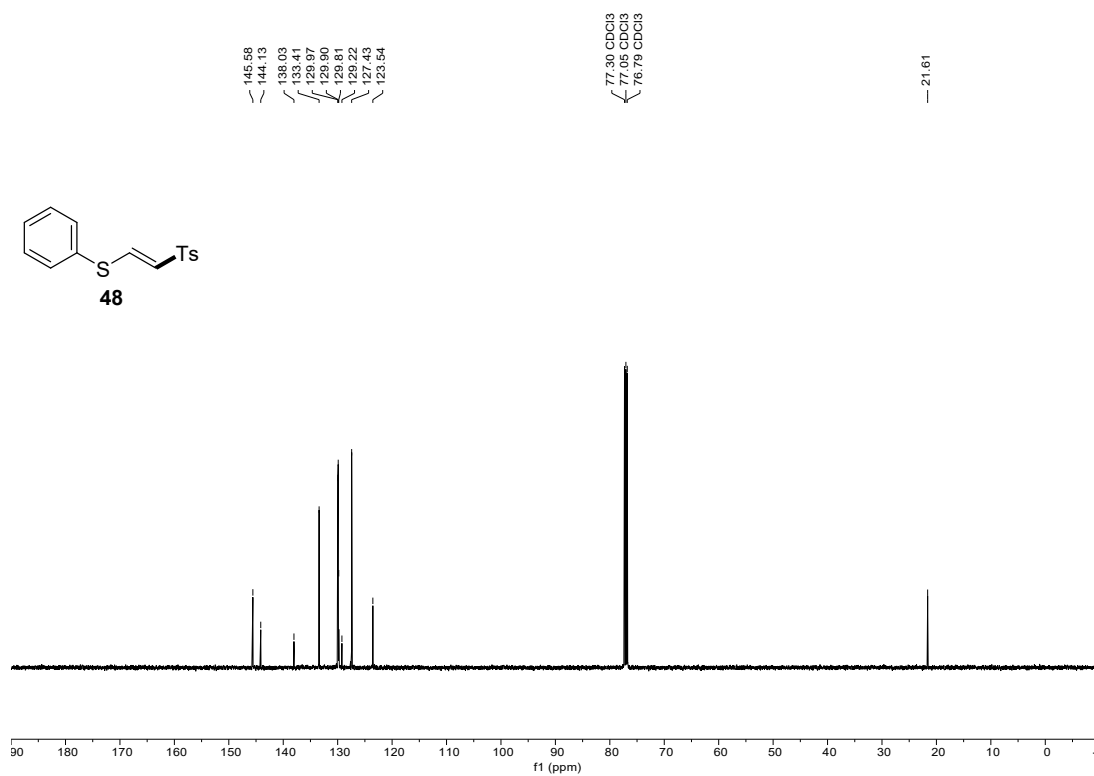

$^1\text{H}$  NMR ( $\text{CDCl}_3$ , 600 MHz) of **49**

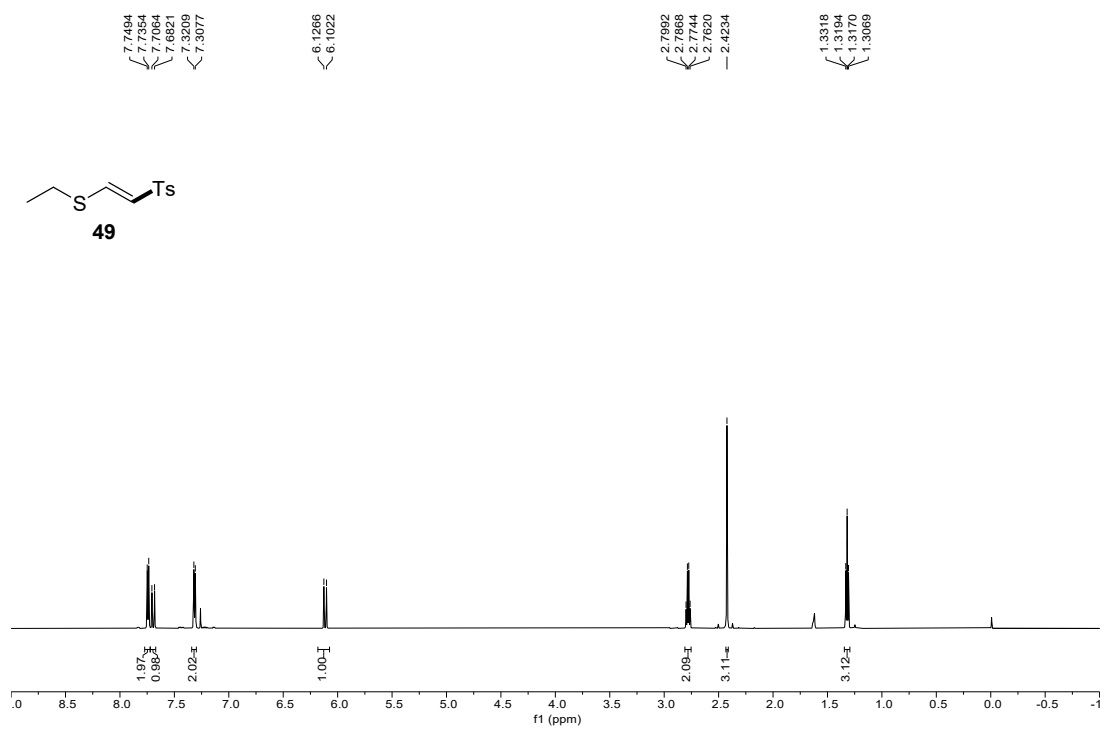

$^{13}\text{C}\{^1\text{H}\}$  NMR ( $\text{CDCl}_3$ , 150 MHz) of **49**

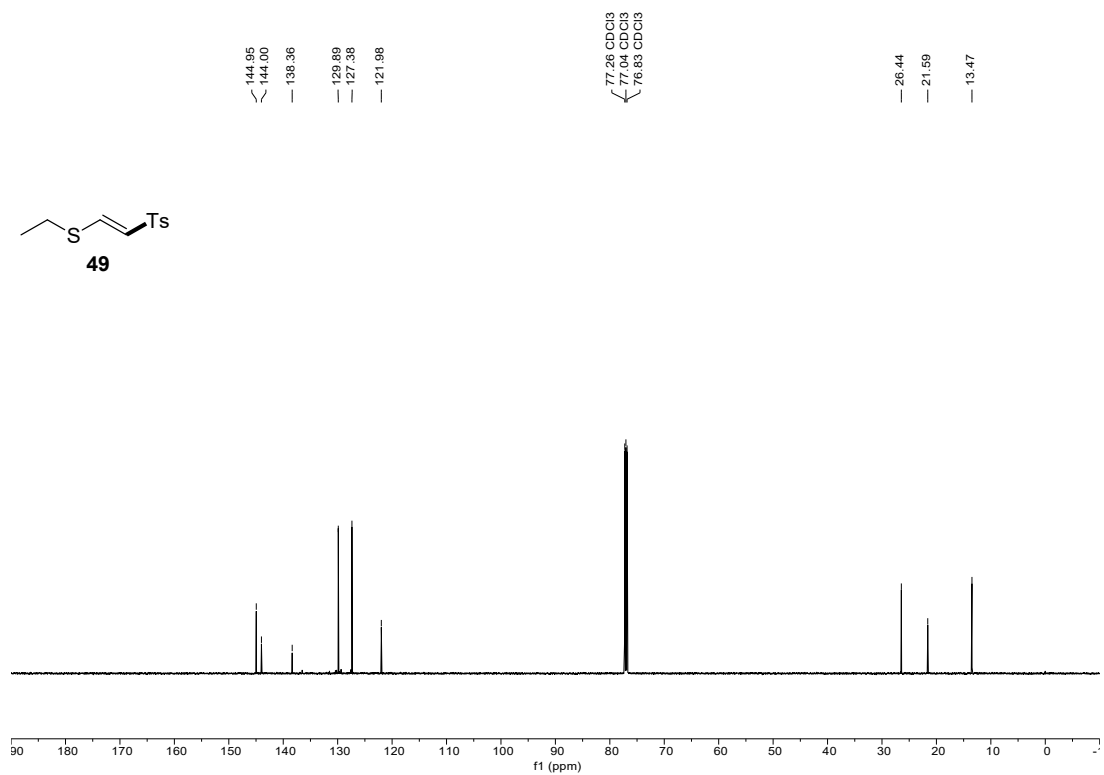

$^1\text{H}$  NMR ( $\text{CDCl}_3$ , 600 MHz) of **50**

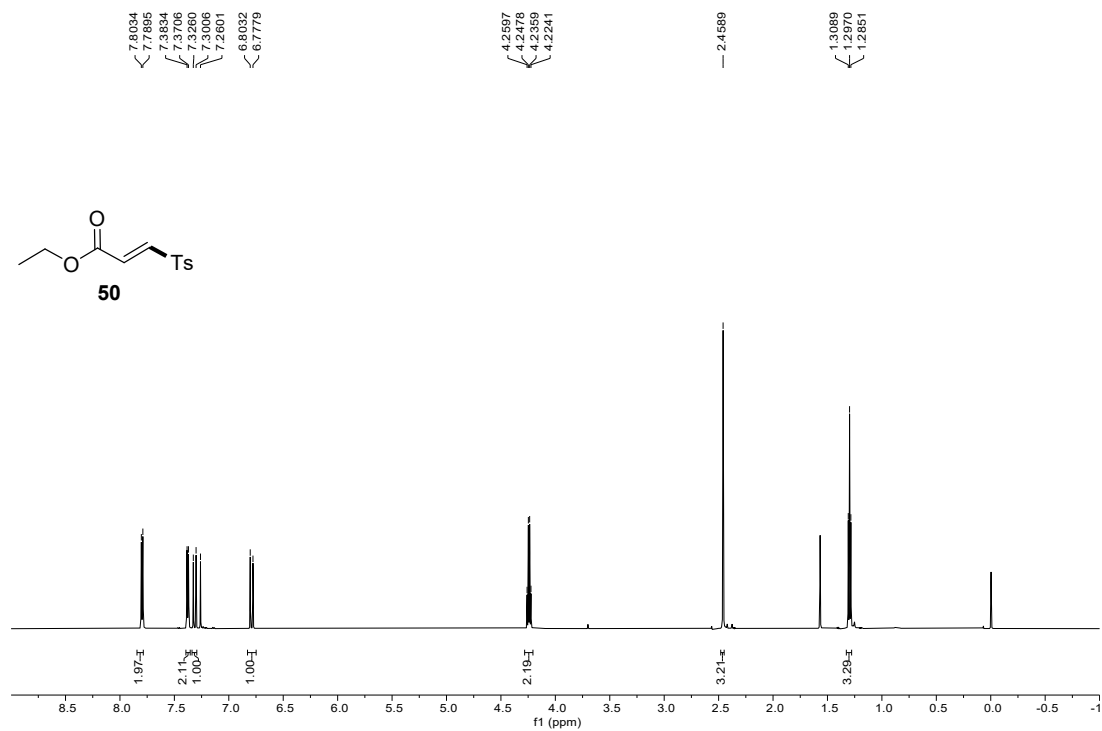

$^{13}\text{C}\{^1\text{H}\}$  NMR ( $\text{CDCl}_3$ , 150 MHz) of **50**

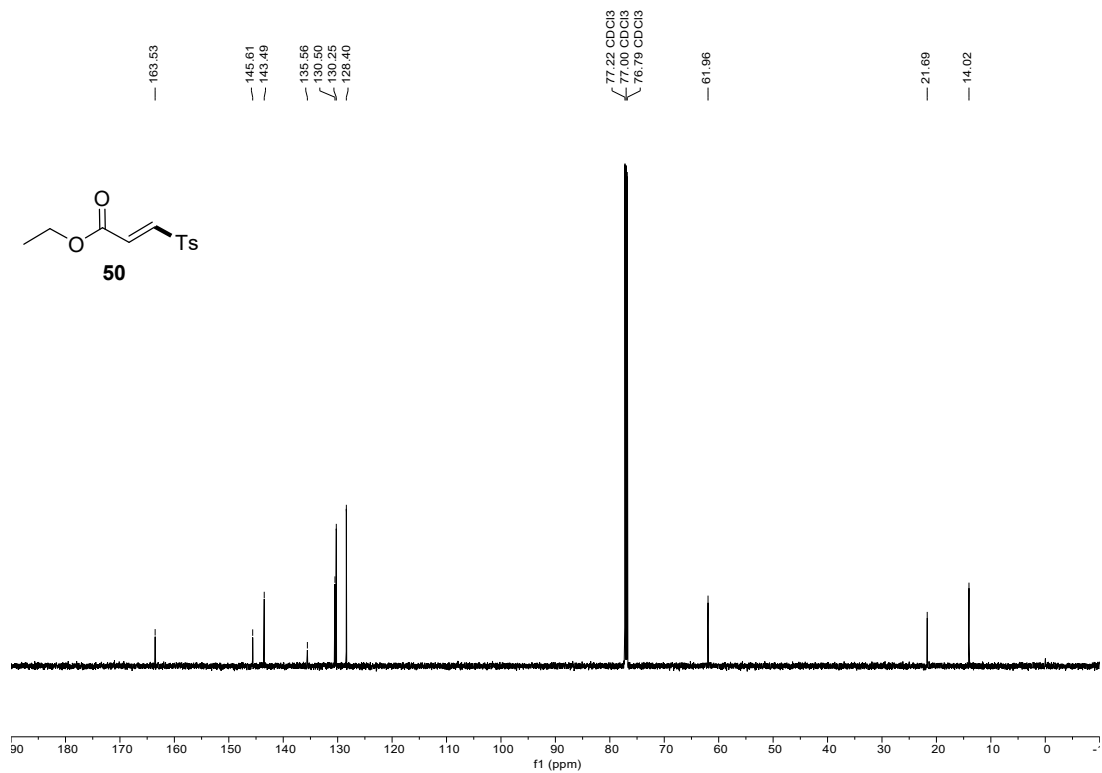

$^1\text{H}$  NMR ( $\text{CDCl}_3$ , 400 MHz) of **51**

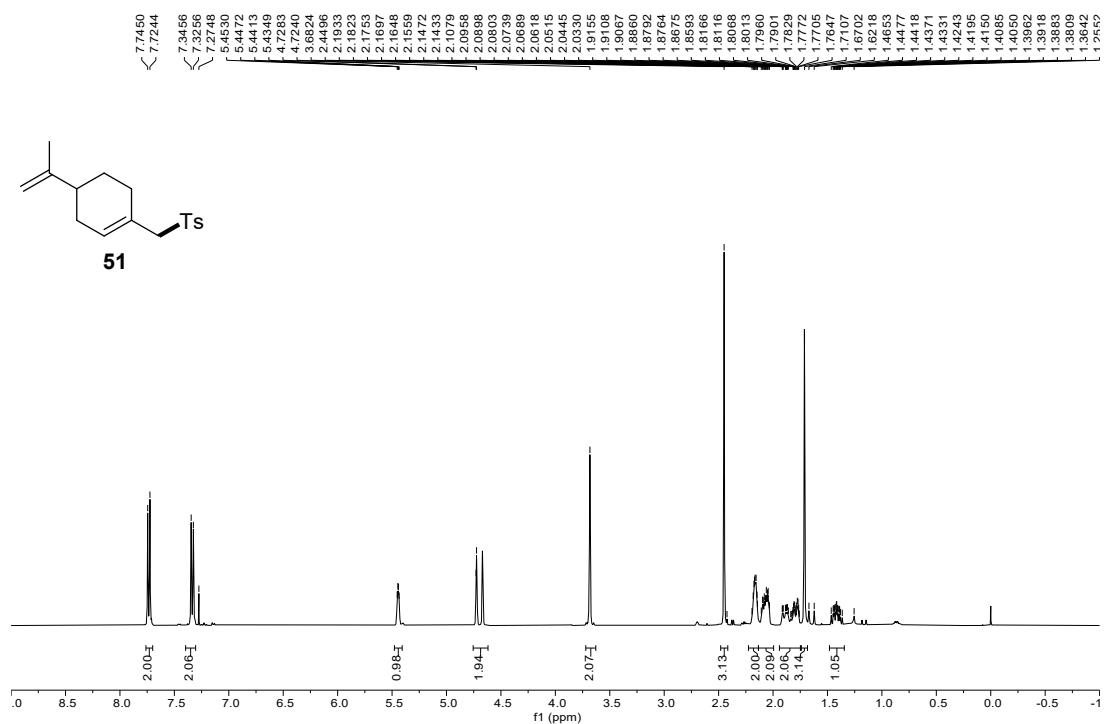

$^{13}\text{C}$  { $^1\text{H}$ } NMR ( $\text{CDCl}_3$ , 100 MHz) of **51**

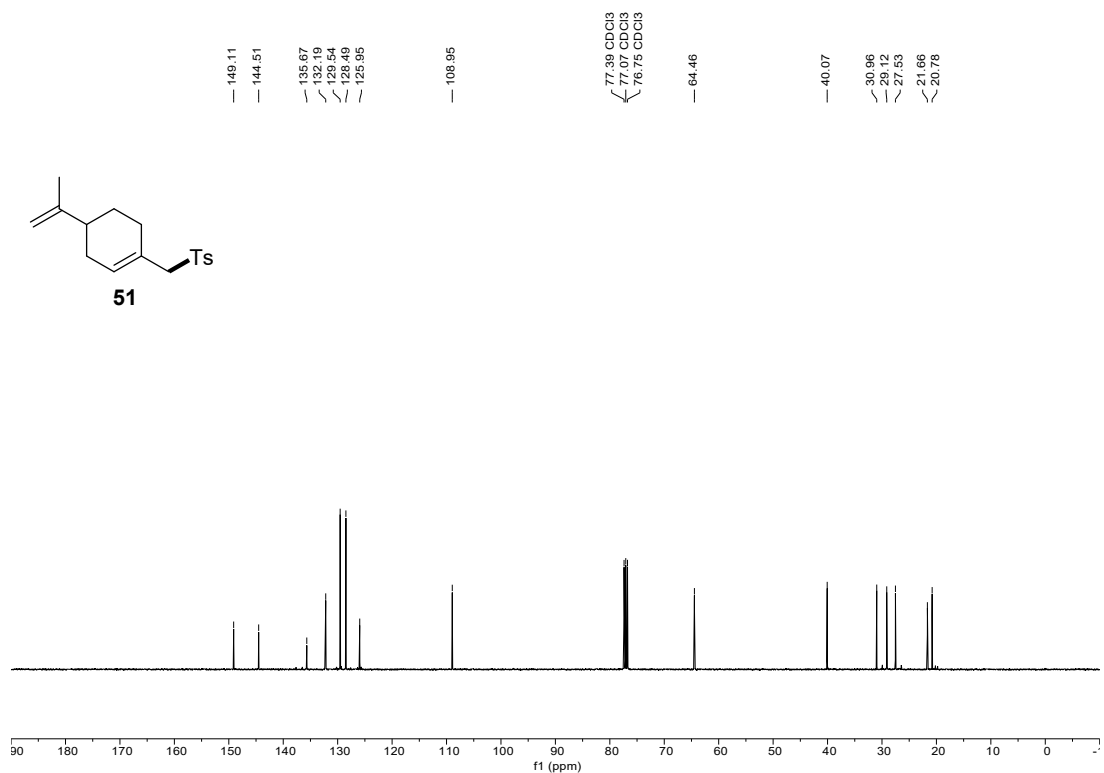

$^1\text{H}$  NMR ( $\text{CDCl}_3$ , 400 MHz) of **52**

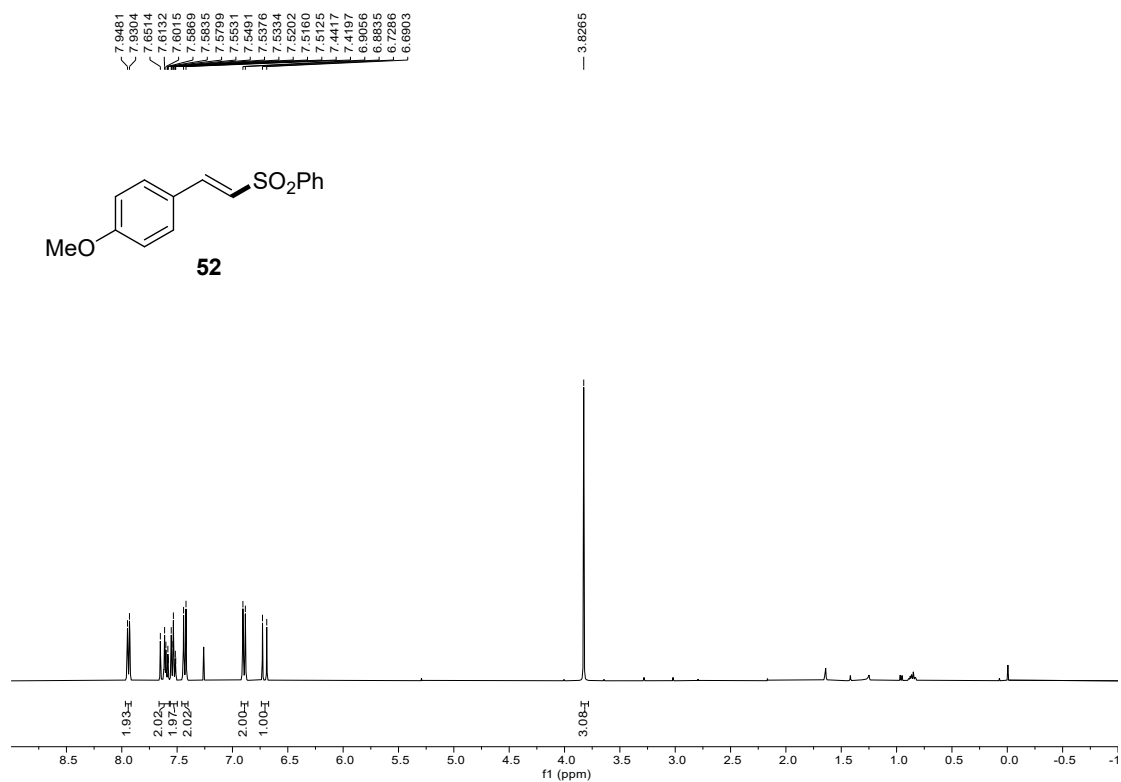

$^{13}\text{C}\{^1\text{H}\}$  NMR ( $\text{CDCl}_3$ , 100 MHz) of **52**

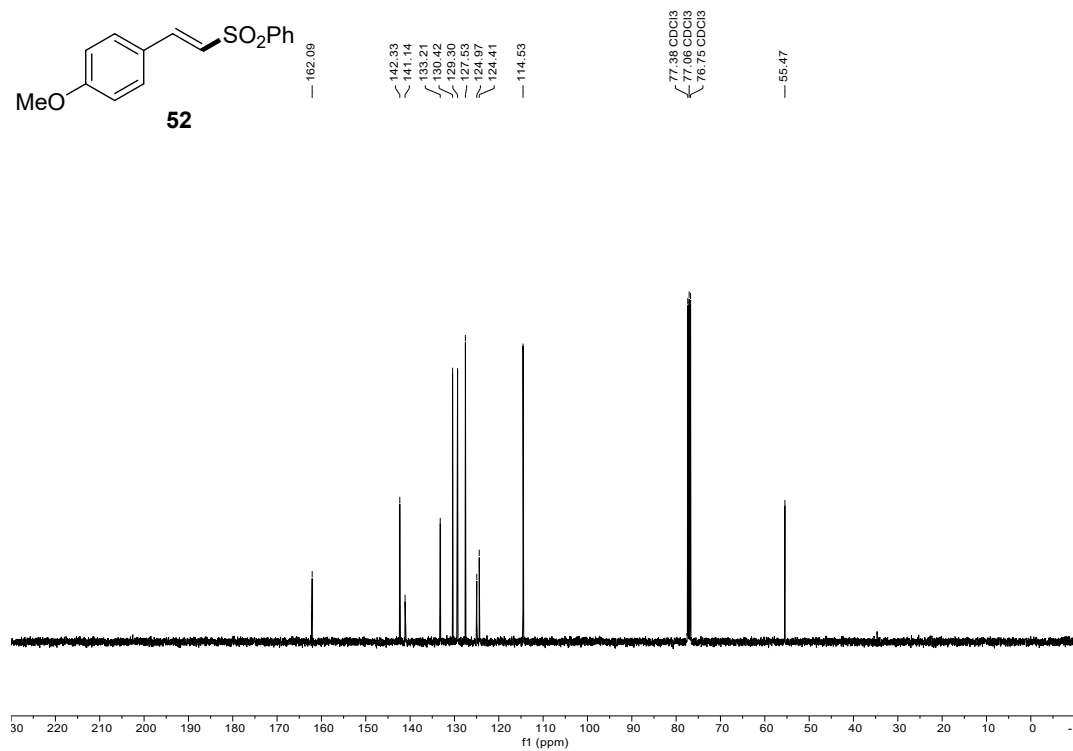



$^1\text{H}$  NMR ( $\text{CDCl}_3$ , 400 MHz) of **53**

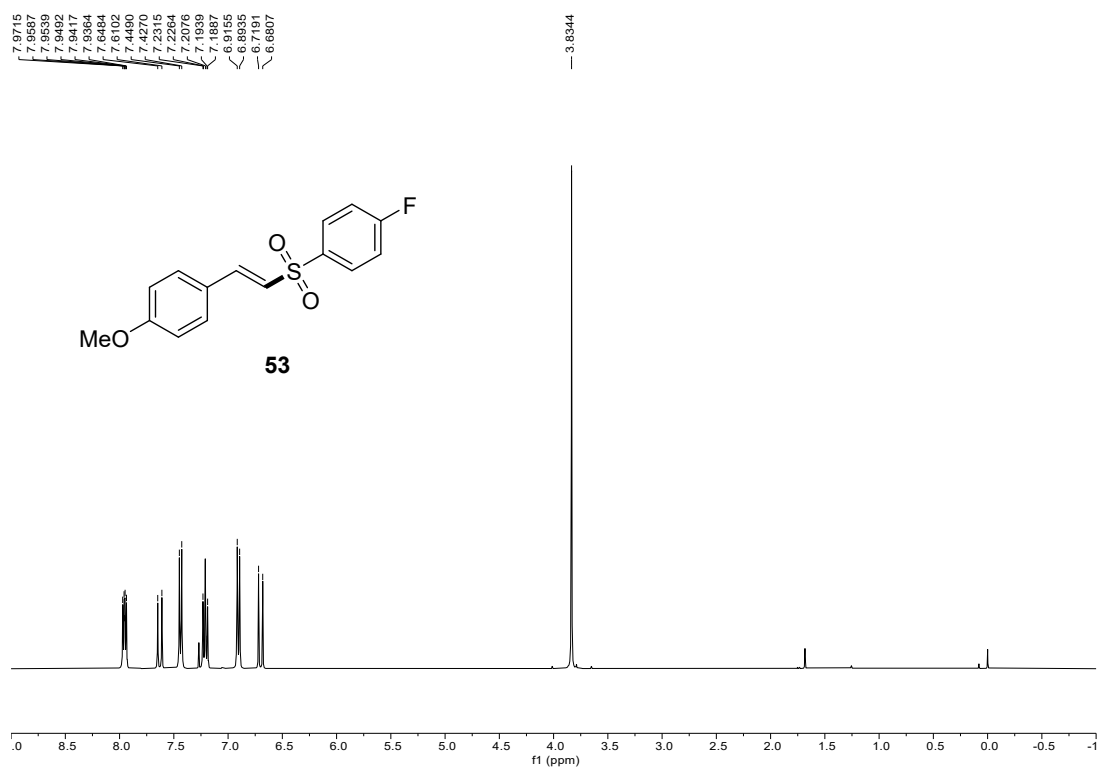

$^{13}\text{C}\{^1\text{H}\}$  NMR ( $\text{CDCl}_3$ , 100 MHz) of **53**

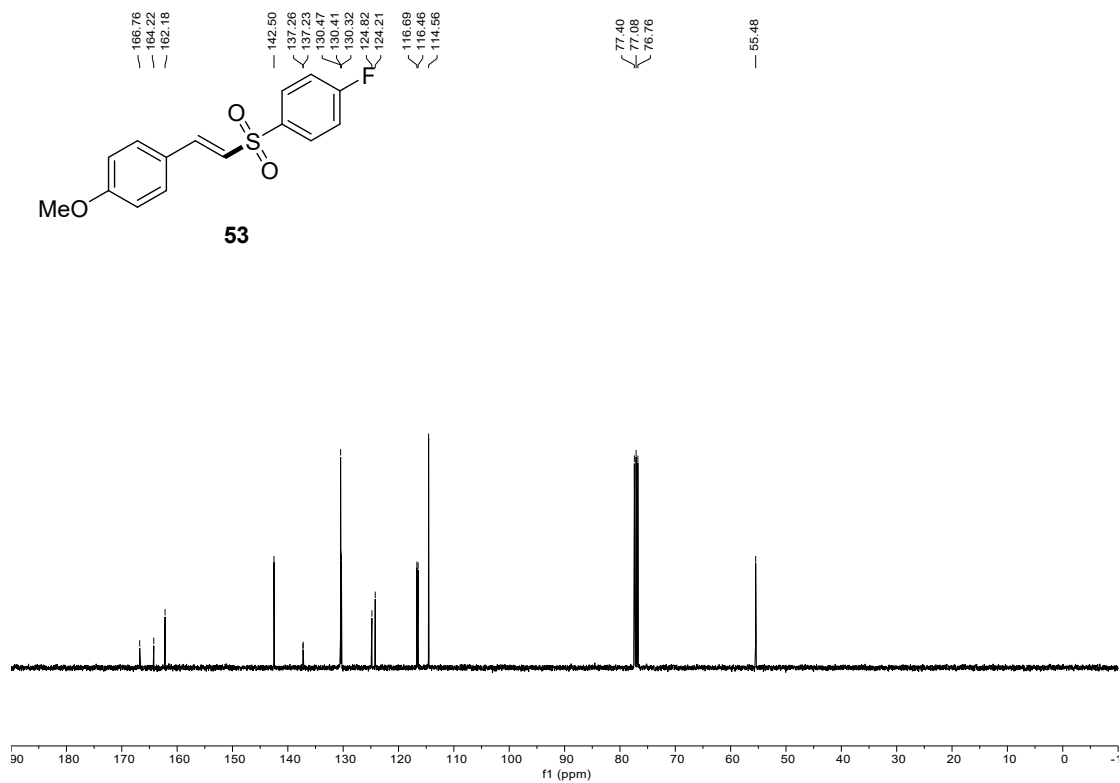

$^{19}\text{F}$  NMR ( $\text{CDCl}_3$ , 471 MHz) of **53**

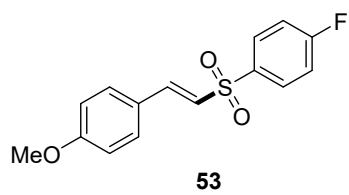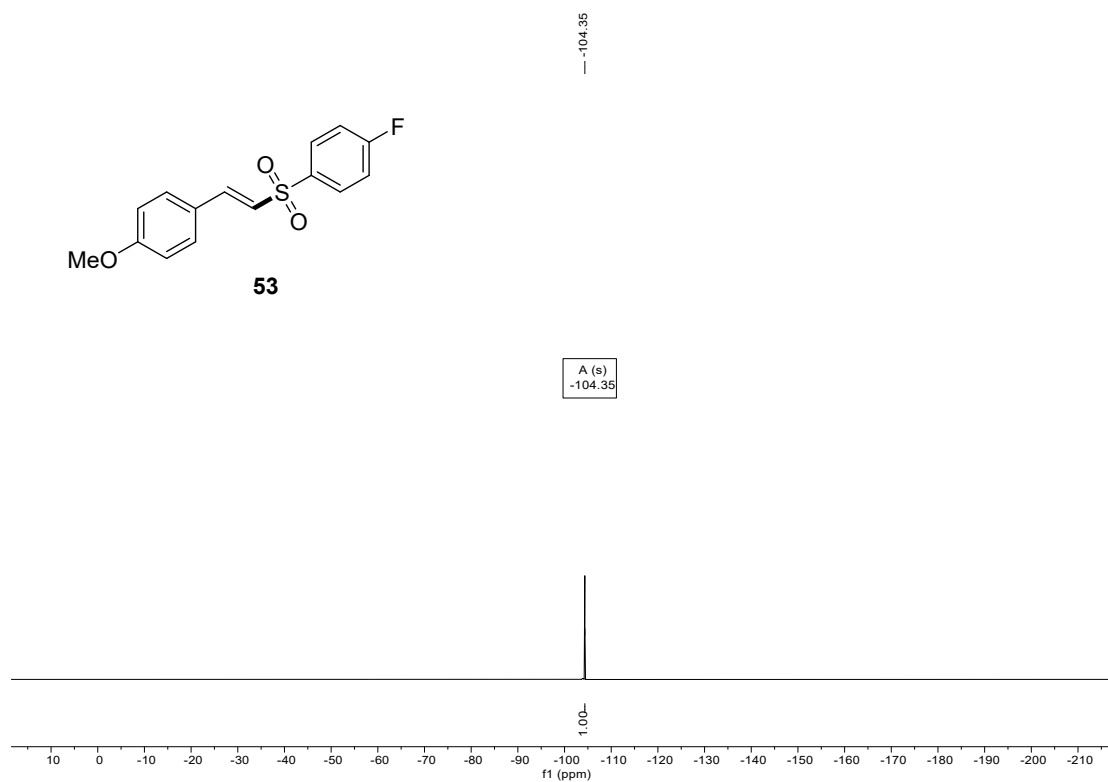

$^1\text{H}$  NMR ( $\text{CDCl}_3$ , 400 MHz) of **54**

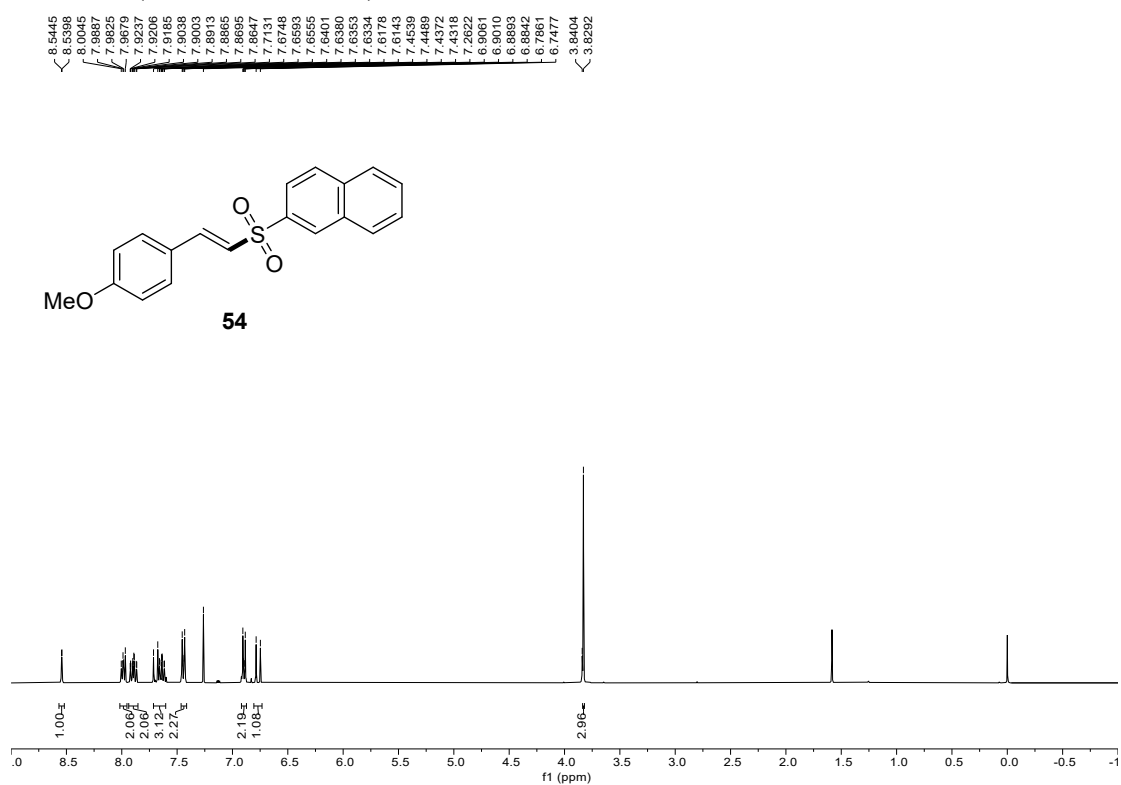

$^{13}\text{C}\{^1\text{H}\}$  NMR ( $\text{CDCl}_3$ , 100 MHz) of **54**

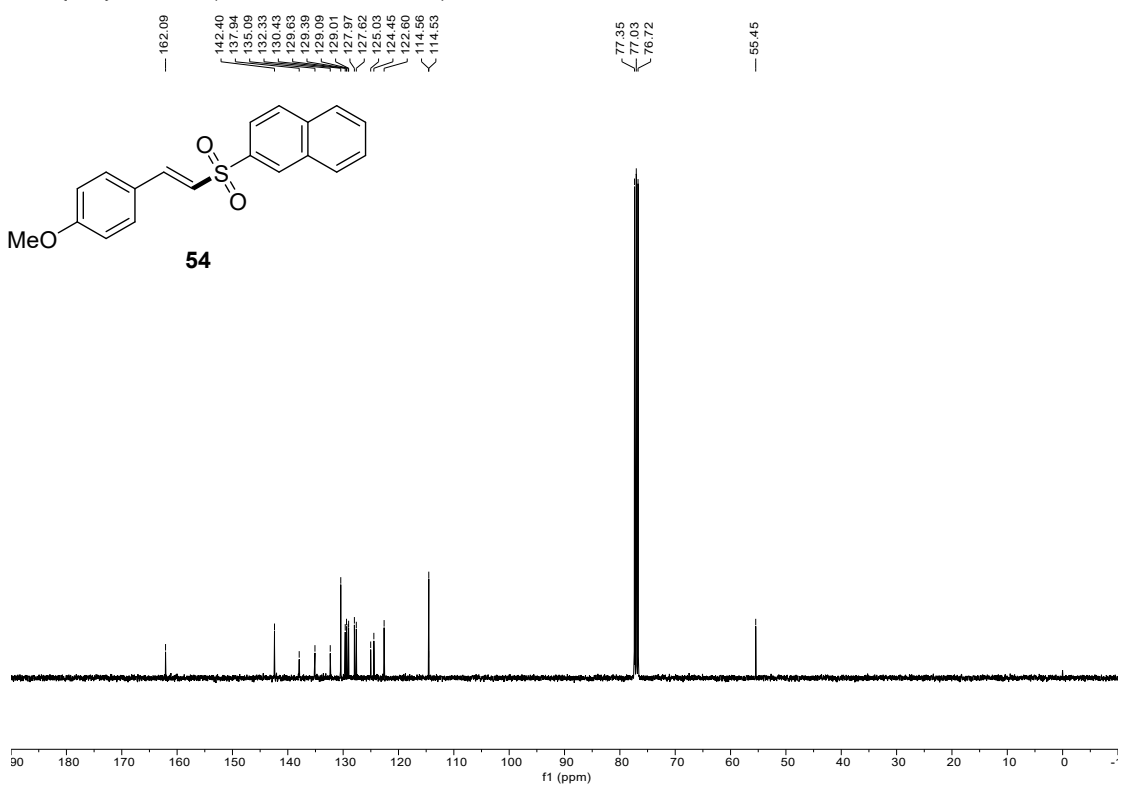

$^1\text{H}$  NMR ( $\text{CDCl}_3$ , 400 MHz) of **55**

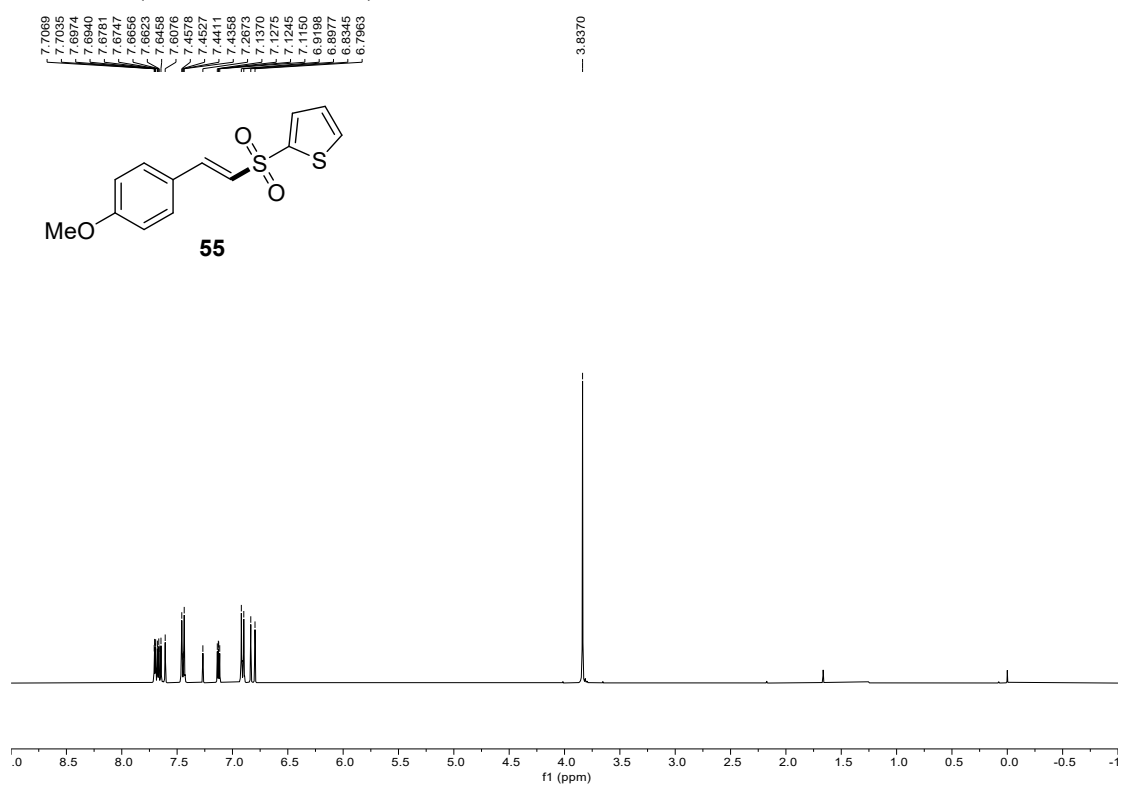

$^{13}\text{C}\{^1\text{H}\}$  NMR ( $\text{CDCl}_3$ , 100 MHz) of **55**

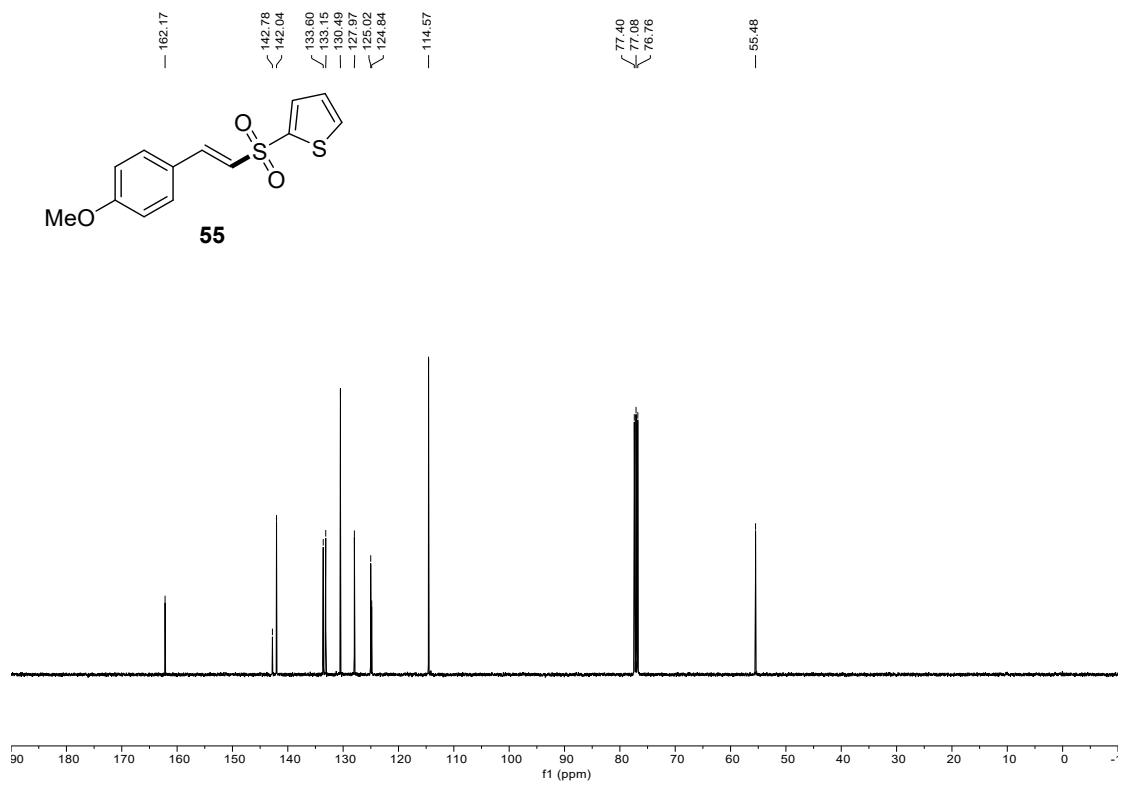

$^1\text{H}$  NMR ( $\text{CDCl}_3$ , 400 MHz) of **57**

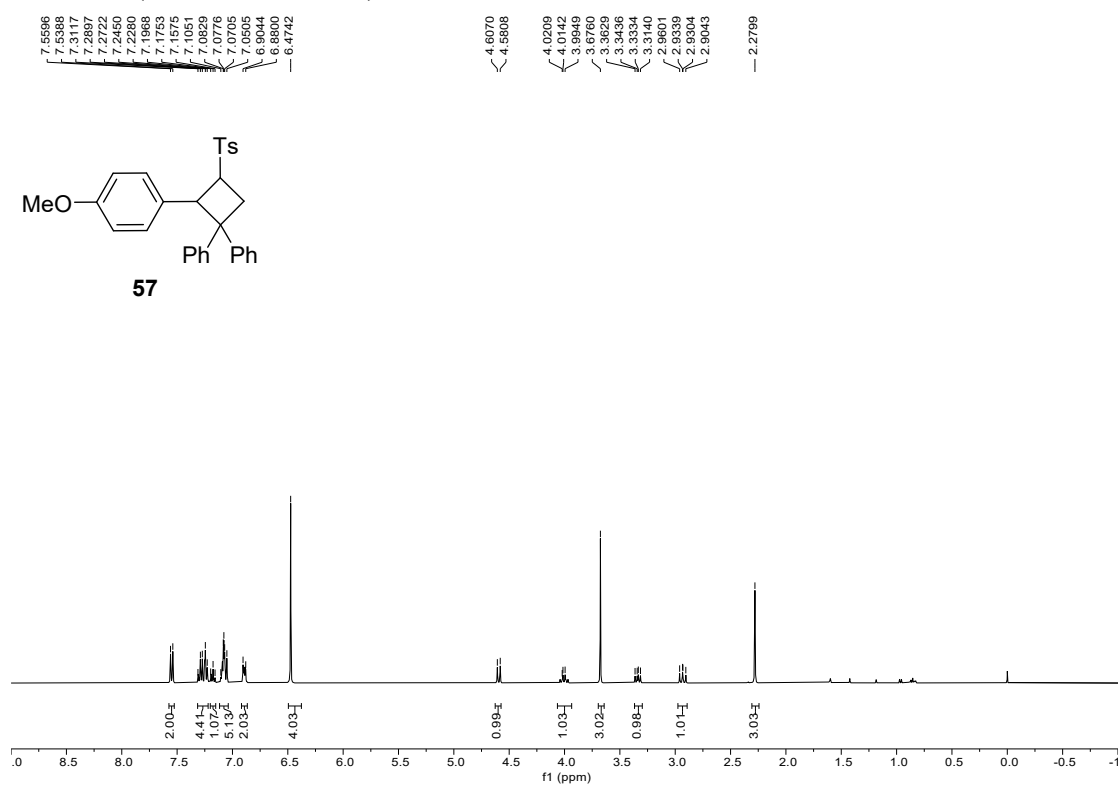

$^{13}\text{C}\{^1\text{H}\}$  NMR ( $\text{CDCl}_3$ , 100 MHz) of **57**

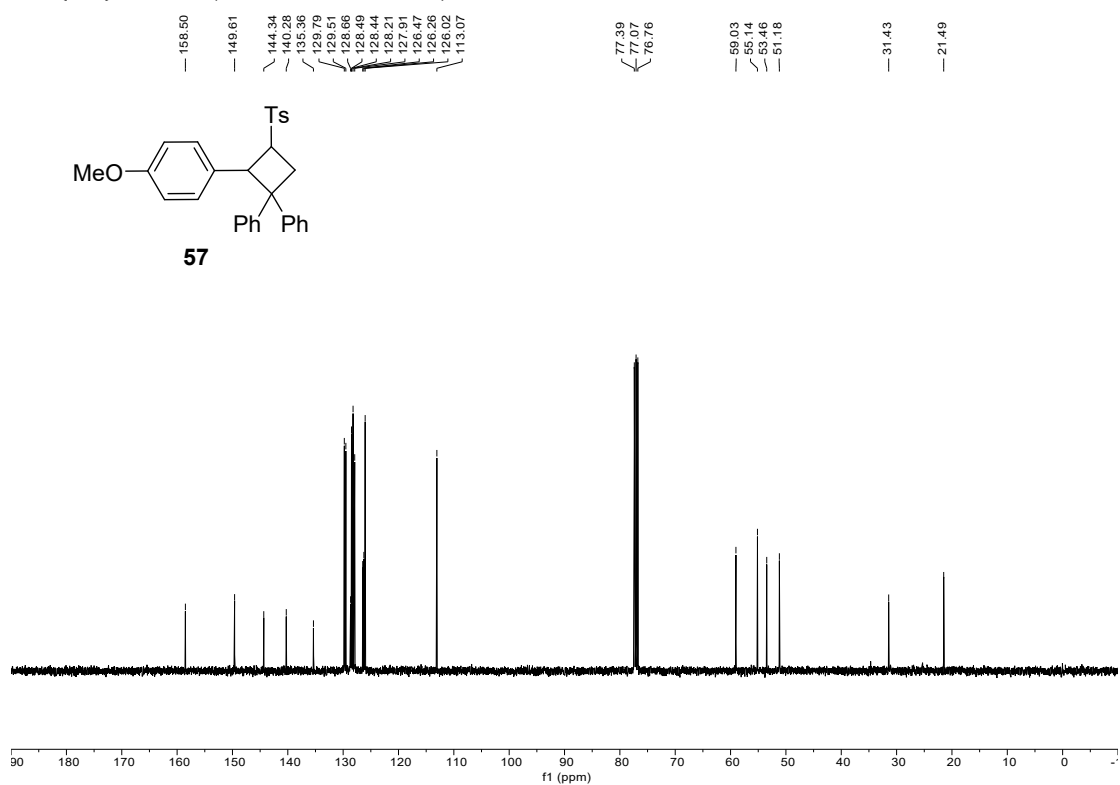

$^1\text{H}$  NMR ( $\text{CDCl}_3$ , 400 MHz) of **58**

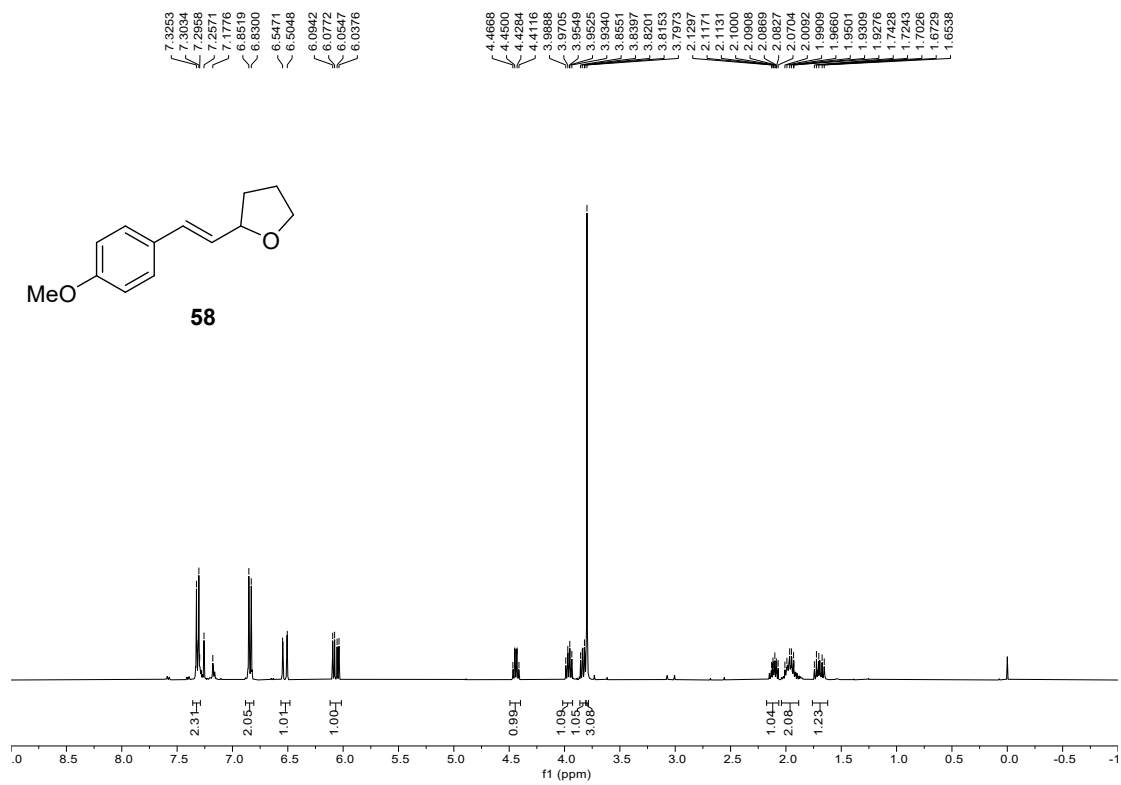

## 11. References

1. Singh, R.; Allam, B. K.; Singh, N.; Kumari, K.; Singh, S. K.; Singh, K. N., A Direct Metal-Free Decarboxylative Sulfonyl Functionalization (DSF) of Cinnamic Acids to  $\alpha,\beta$ -Unsaturated Phenyl Sulfones. *Org. Lett.* **2015**, *17*, 2656-2659.
2. Fritz, S. P.; Mumtaz, A.; Yar, M.; McGarrigle, E. M.; Aggarwal, V. K., Sulfinamides as Highly Effective Amine Protecting Groups and Their Use in the Conversion of Amino Alcohols into Morpholines. *Eur. J. Org. Chem.* **2011**, *2011*, 3156-3164.
3. Meyer, A. U.; Straková, K.; Slanina, T.; König, B., Eosin Y (EY) Photoredox-Catalyzed Sulfonylation of Alkenes: Scope and Mechanism. *Chem. Eur. J.* **2016**, *22*, 8694-8699.
4. Chatalova-Sazepin, C.; Wang, Q.; Sammis, G. M.; Zhu, J., Copper-Catalyzed Intermolecular Carboetherification of Unactivated Alkenes by Alkyl Nitriles and Alcohols. *Angew. Chem. Int. Ed.* **2015**, *54*, 5443-5446.
5. Wang, Z.; Zhang, Z.; Zhao, W.; Sivaguru, P.; Zanoni, G.; Wang, Y.; Anderson, E. A.; Bi, X., Synthetic exploration of sulfinyl radicals using sulfinyl sulfones. *Nat. Commun.* **2021**, *12*, 5244.
6. Hu, F.; Lei, X., Synthesis of Diaryl Sulfones at Room Temperature: Cu-Catalyzed Cross-Coupling of Arylsulfonyl Chlorides with Arylboronic Acids. *ChemCatChem* **2015**, *7*, 1539-1542.
7. Gui, Q.; Han, K.; Liu, Z.; Su, Z.; He, X.; Jiang, H.; Tian, B.; Li, Y., *E*-Selective synthesis of vinyl sulfones *via* silver-catalyzed sulfonylation of styrenes. *Org. Biomol. Chem.* **2018**, *16*, 5748-5751.
8. Kadari, L.; Palakodety, R. K.; Yallapragada, L. P., Iodine-Catalyzed Facile Approach to Sulfones Employing TosMIC as a Sulfonylating Agent. *Org. Lett.* **2017**, *19*, 2580-2583.
9. Ge, Q.-Q.; Qian, J.-S.; Xuan, J., Electron Donor–Acceptor Complex Enabled Decarboxylative Sulfonylation of Cinnamic Acids under Visible-Light Irradiation. *J. Org. Chem.* **2019**, *84*, 8691-8701.
10. Saavedra-Olavarría, J.; Hermosilla-Ibáñez, P.; Almodóvar, I.; Pérez, E. G., Fast Heating-Assisted One-Pot Copper-Catalyzed Sulfonylation and Sulfochlorination of Styrenes. *Eur. J. Org. Chem.* **2022**, *2022*, e202101526.
11. Wang, Y.-C.; Chen, X.; Alvey, G. R.; Shatskiy, A.; Liu, J.-Q.; Kärkäs, M. D.; Wang, X.-S., Copper-assisted Wittig-type olefination of aldehydes with *p*-toluenesulfonylmethyl isocyanide. *Org. Chem. Front.* **2022**, *9*, 4158-4163.
12. Zhan, Z.; Ma, H.; Wei, D.; Pu, J.; Zhang, Y.; Huang, G., Metal-free catalyzed synthesis of the (*E*)-vinyl sulfones *via* aromatic olefins with arylsulfonyl hydrazides. *Tetrahedron Lett.* **2018**, *59*, 1446-1450.
13. Terent'ev, A. O.; Mulina, O. M.; Pirgach, D. A.; Ilovaisky, A. I.; Syroeshkin, M. A.; Kapustina, N. I.; Nikishin, G. I., Electrosynthesis of vinyl sulfones from alkenes and sulfonyl hydrazides mediated by KI: An electrochemical mechanistic study. *Tetrahedron.* **2017**, *73*, 6871-6879.
14. Reeves, D. C.; Rodriguez, S.; Lee, H.; Haddad, N.; Krishnamurthy, D.;

- Senanayake, C. H., Palladium-catalyzed coupling of vinyl tosylates with arylsulfinate salts. *Tetrahedron Lett.* **2009**, *50*, 2870-2873.
15. Zhang, G.; Fu, J.-G.; Zhao, Q.; Zhang, G.-S.; Li, M.-Y.; Feng, C.-G.; Lin, G.-Q., Silver-promoted synthesis of vinyl sulfones from vinyl bromides and sulfonyl hydrazides in water. *Chem. Commun.* **2020**, *56*, 4688-4691.
16. Takaki, H.; Yoshihiro, S.; Takashi, O.; Takahiro, A.; Hideki, K.; Hitoshi, S.; Katsuhiko, I., “Syn-Effect” in the Conversion of (*E*)-Vinyl Sulfones to the Corresponding Allylic Sulfones. *Bull. Chem. Soc. Jpn.* **1992**, *65*, 75-96.
17. Signore, G.; Malanga, C.; Menicagli, R., Pyridine and triphenylphosphine oxide activation of sulfonyl chlorides in the syntheses of (*E*) alk-1-enyl sulfones. *Tetrahedron.* **2008**, *64*, 11218-11223.
18. Nandi, G. C., An efficient Cu-catalyzed microwave-assisted synthesis of diaryl sulfones. *Synth. Commun.* **2017**, *47*, 319-323.
19. Chawla, R.; Kapoor, R.; Singh, A. K.; Yadav, L. D. S., A one-pot regioselective synthetic route to vinyl sulfones from terminal epoxides in aqueous media. *Green Chem.* **2012**, *14*, 1308-1313.
20. Ding, X.; Wen, J.; Wang, J.; Yu, J.; Li, J.-H., Synthesis of Vinyl Sulfoxides Using Sulfinyl Chlorides and Olefins. *J. Chem. Res.* **2015**, *39*, 282-285.
21. Feldman, K. S.; Wroblewski, M. L., Alkynyliodonium Salts in Organic Synthesis. Dihydrofuran Formation via a Formal Stevens Shift of a Carbon Substituent within a Disubstituted-Carbon Oxonium Ylide. *J. Org. Chem.* **2000**, *65*, 8659-8668.
22. Medel, R.; Monterde, M. I.; Plumet, J.; Rojas, J. K., Total Stereochemical Control in the Addition of Thiols to *p*-Toluenesulfonylacetylene. Synthesis of *Z*- and *E*-2-Sulfanylvinylsulfonyl Derivatives. *J. Org. Chem.* **2005**, *70*, 735-738.
23. Wang, X.; Jiang, N.; Zhao, S.; Xi, S.; Wang, J.; Jing, T.; Zhang, W.; Guo, M.; Gong, P.; Zhai, X., Design, synthesis and biological evaluation of novel 4-(2-fluorophenoxy)quinoline derivatives as selective c-Met inhibitors. *Bioorg. Med. Chem.* **2017**, *25*, 886-896.
24. Zhang, J.; Li, Y.; Xu, R.; Chen, Y., Donor–Acceptor Complex Enables Alkoxy Radical Generation for Metal-Free C(sp<sup>3</sup>)–C(sp<sup>3</sup>) Cleavage and Allylation/Alkenylation. *Angew. Chem., Int. Ed.* **2017**, *56*, 12619-12623.
25. Alkan-Zambada, M.; Hu, X., Cu-Catalyzed Photoredox Chlorosulfonation of Alkenes and Alkynes. *J. Org. Chem.* **2019**, *84*, 4525-4533.
26. Lei, T.; Zhou, C.; Huang, M.-Y.; Zhao, L.-M.; Yang, B.; Ye, C.; Xiao, H.; Meng, Q.-Y.; Ramamurthy, V.; Tung, C.-H.; Wu, L.-Z., General and Efficient Intermolecular [2+2] Photodimerization of Chalcones and Cinnamic Acid Derivatives in Solution through Visible-Light Catalysis. *Angew. Chem., Int. Ed.* **2017**, *56*, 15407-15410.
27. Paul, S.; Guin, J., Radical C(sp<sup>3</sup>)–H alkenylation, alkynylation and allylation of ethers and amides enabled by photocatalysis. *Green Chem.* **2017**, *19*, 2530-2534.
28. Zhang, M.; Yang, L.; Yang, H.; An, G.; Li, G., Visible Light Mediated C(sp<sup>3</sup>)-H Alkenylation of Cyclic Ethers Enabled by Aryl Ketone. *ChemCatChem* **2019**, *11*, 1606-1609.
